# Supplementary material for: Oxidative aromatic C–N bond formation: convenient synthesis of N-amino-3-nitrile-indoles via FeBr3-mediated intramolecular cyclization
Source: Royal Society of Chemistry journal article supplement (doi:10.1039/c1ob05069a), 2011-01-01
Supplement: c1ob05069a.pdf [file c1ob05069a.pdf]

Supporting Information for

**Oxidative Aromatic C-N Bond Formation:**  
**Convenient Synthesis of *N*-Aminoindole-3-carbonitriles via**  
**FeBr<sub>3</sub>-Mediated Intramolecular Cyclization**

Zisheng Zheng, Lina Tang, Yanfeng Fan, Xiuxiang Qi, Yunfei Du\* and Daisy  
Zhang-Negrerie\*

*Tianjin Key Laboratory for Modern Drug Delivery & High-Efficiency, School of  
Pharmaceutical Science and Technology, Tianjin University, Tianjin 300072, P. R. of China*

E-mail: [duyunfeier@tju.edu.cn](mailto:duyunfeier@tju.edu.cn), [daisy\\_negrerie@tju.edu.cn](mailto:daisy_negrerie@tju.edu.cn)

Fax: +86-22-27404031 Tel: +86-22-27404031

**Supplementary Material**

|     |                                                                                                  | Page    |
|-----|--------------------------------------------------------------------------------------------------|---------|
| I   | <sup>1</sup> H and <sup>13</sup> C NMR spectra of the Substrates <b>1</b>                        | S2-S20  |
| II  | <sup>1</sup> H and <sup>13</sup> C NMR spectra of <i>N</i> -aminoindole-3-carbonitriles <b>2</b> | S21-S39 |
| III | <sup>1</sup> H and <sup>13</sup> C NMR spectra of 5-aminopyrazole compounds <b>4</b>             | S40-S42 |
| IV  | X-ray Structure and Data of Product <b>2a</b>                                                    | S43-S55 |

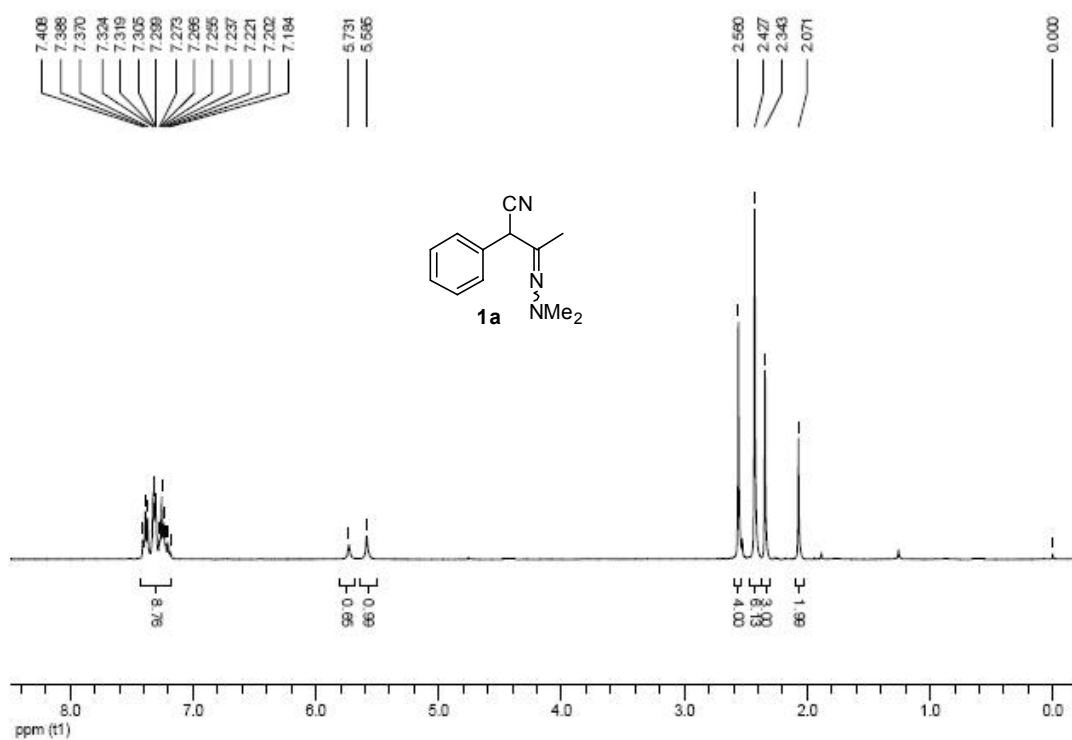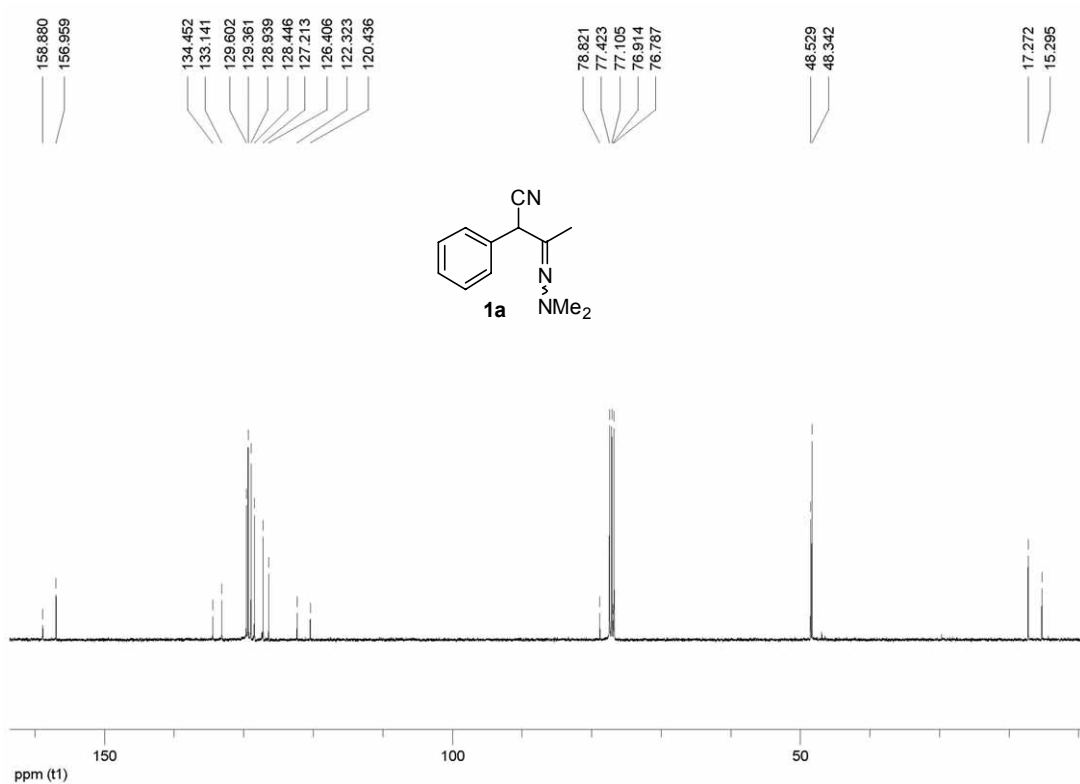

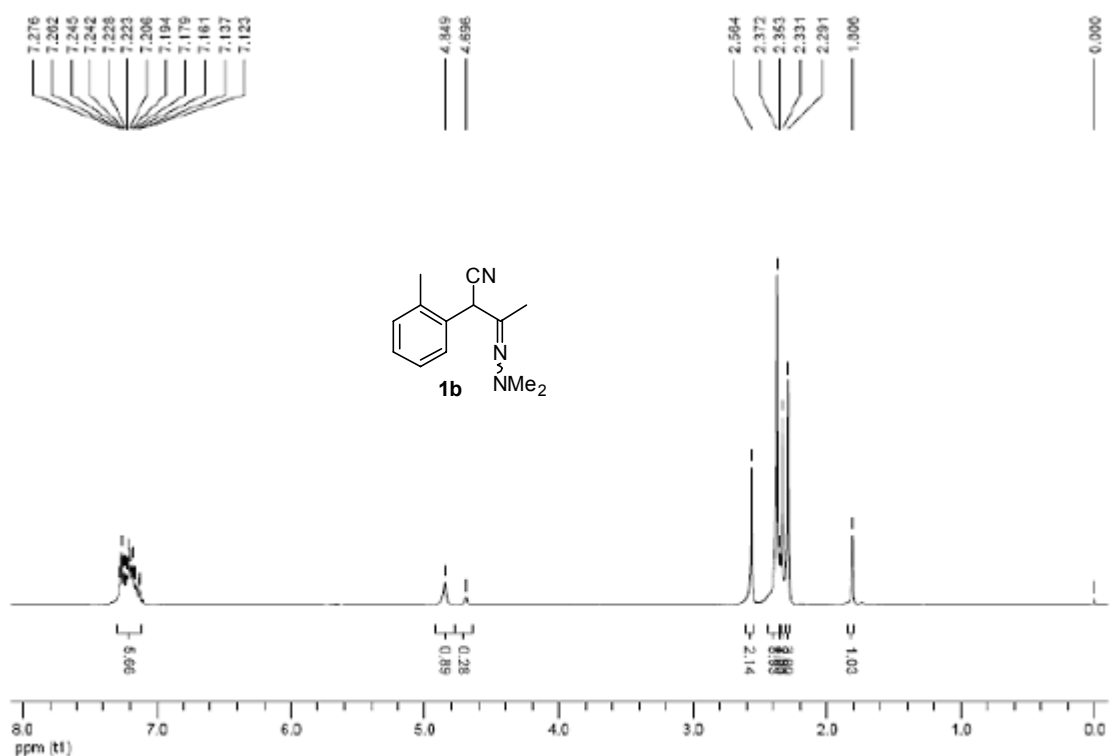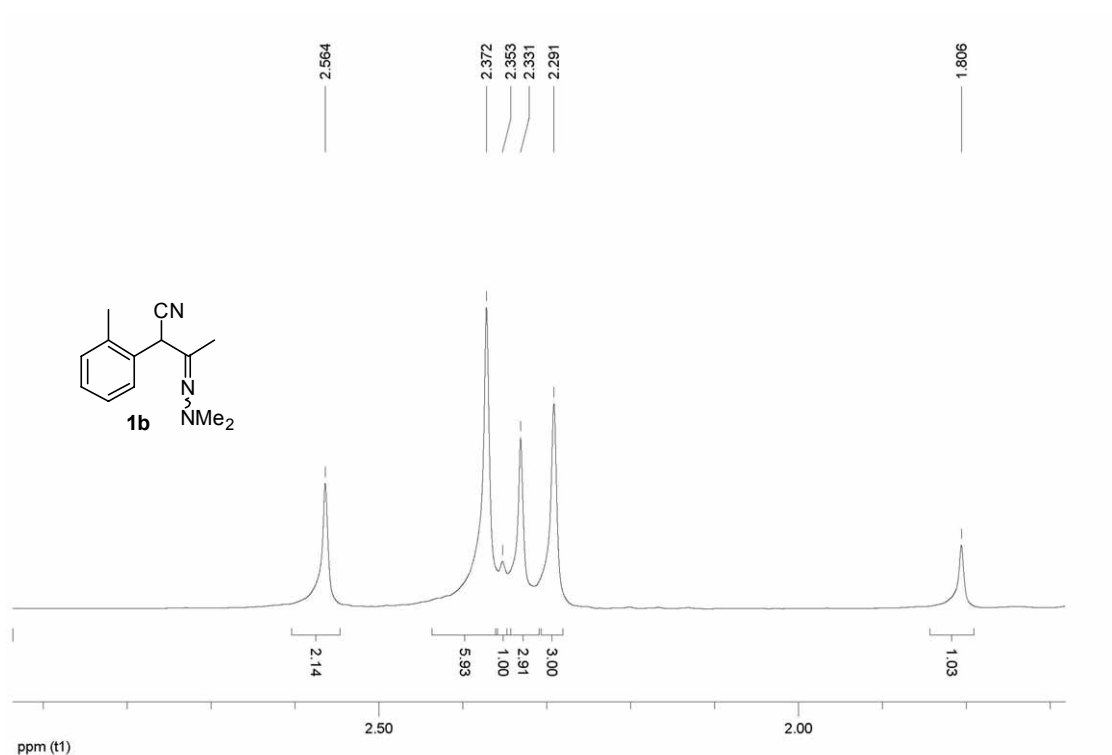

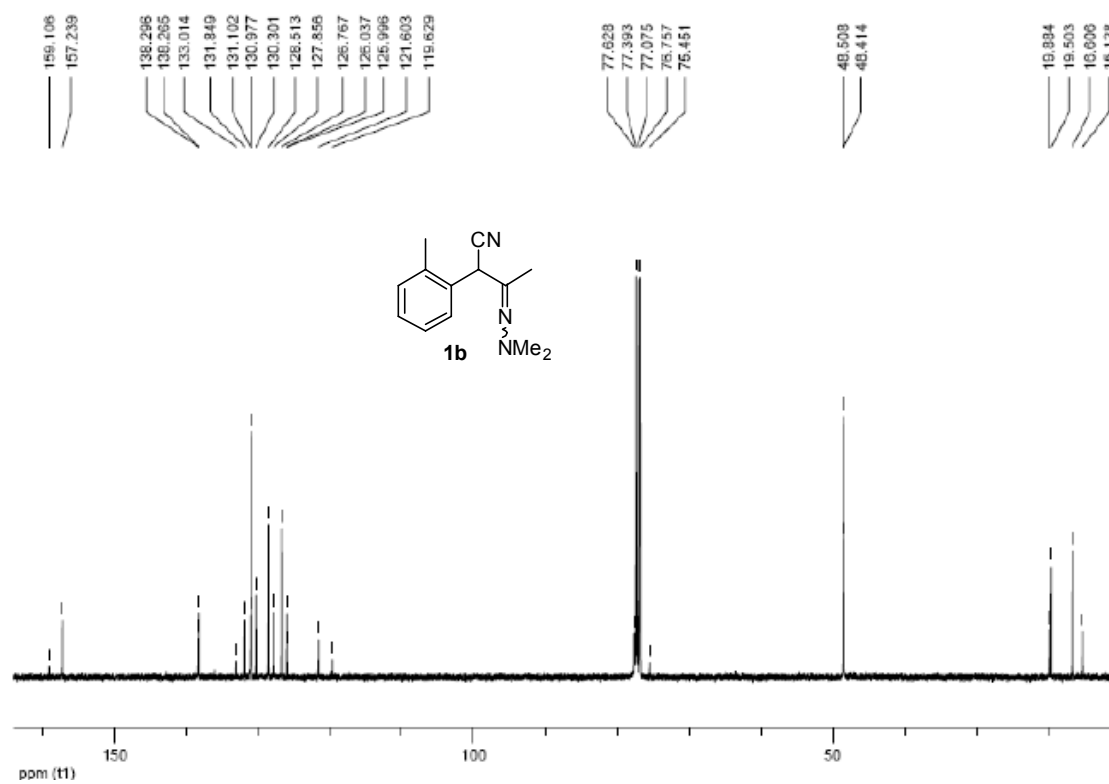

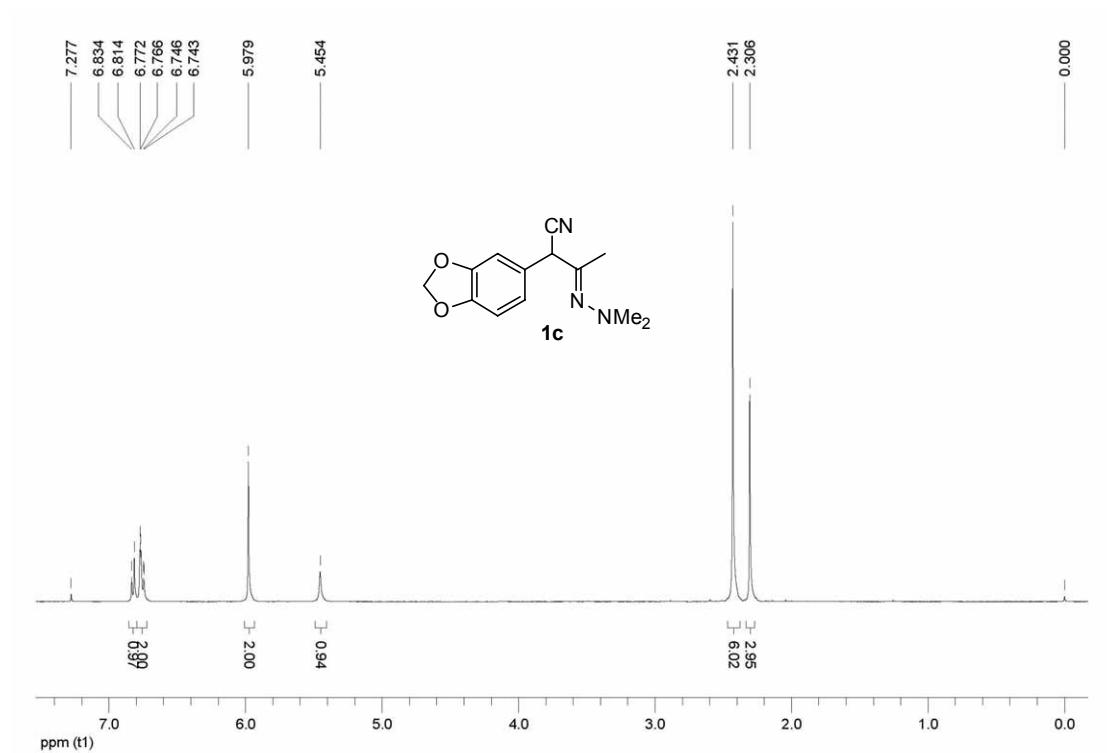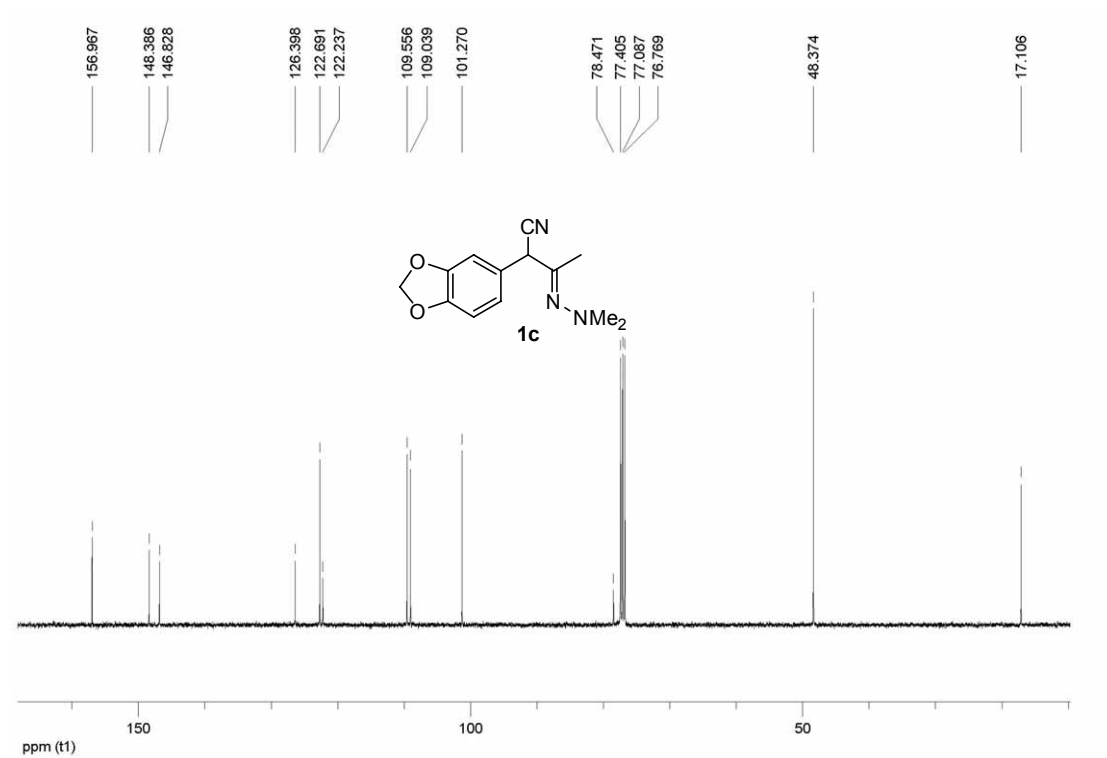

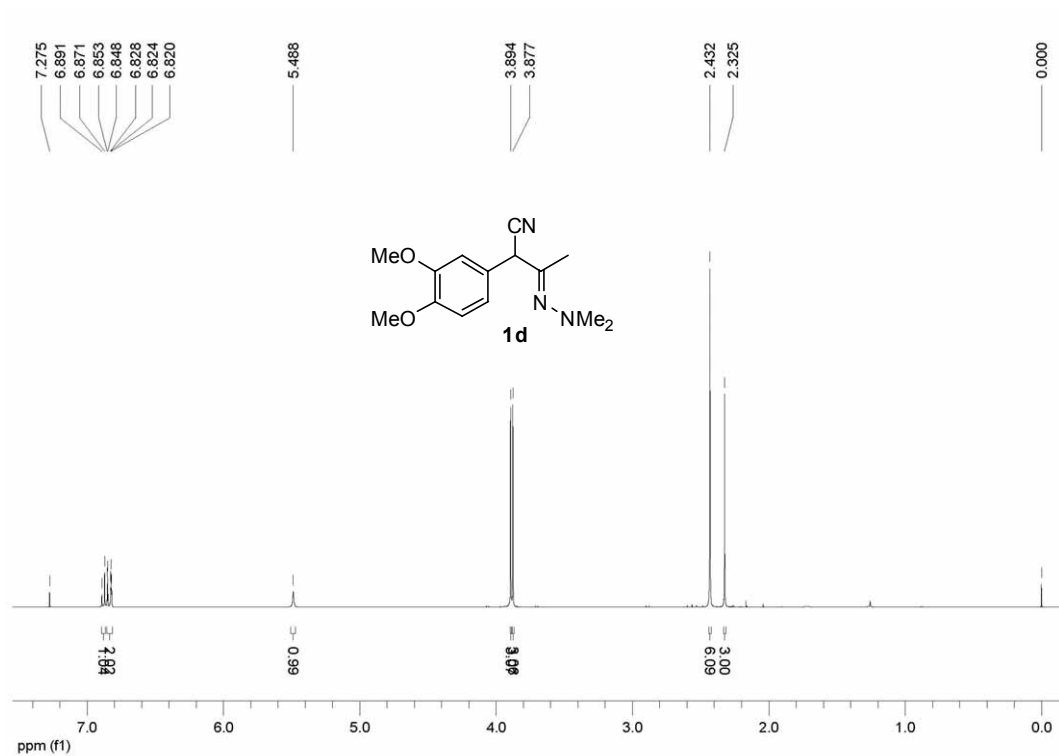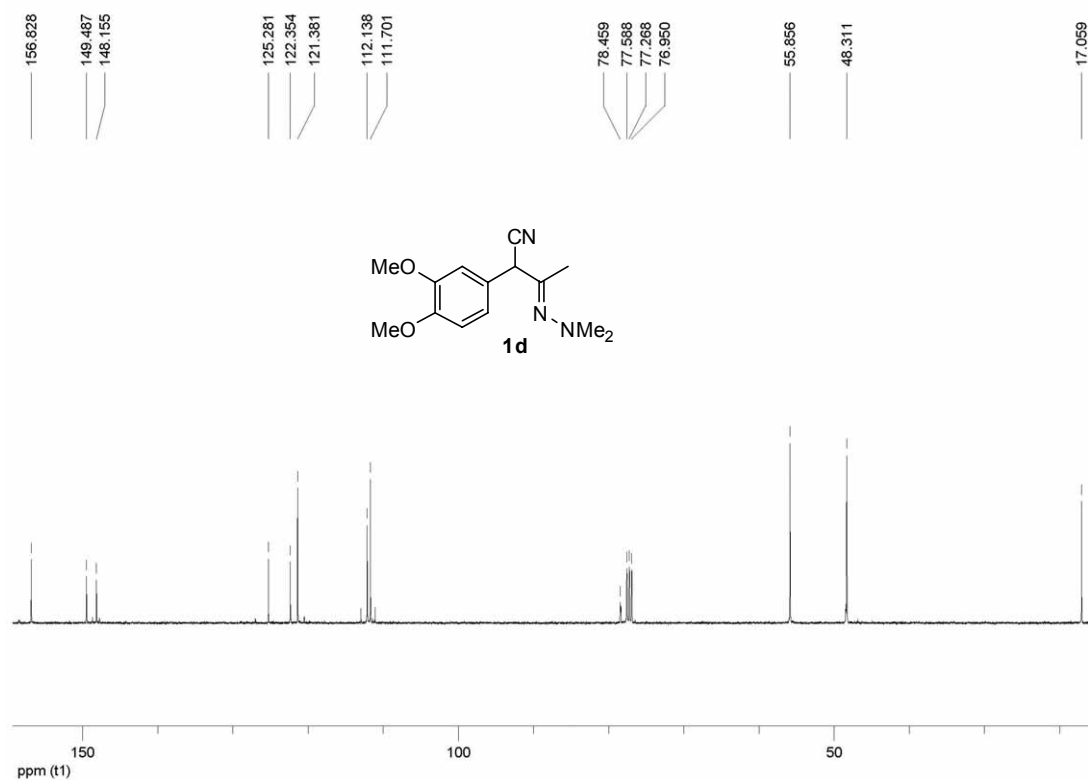

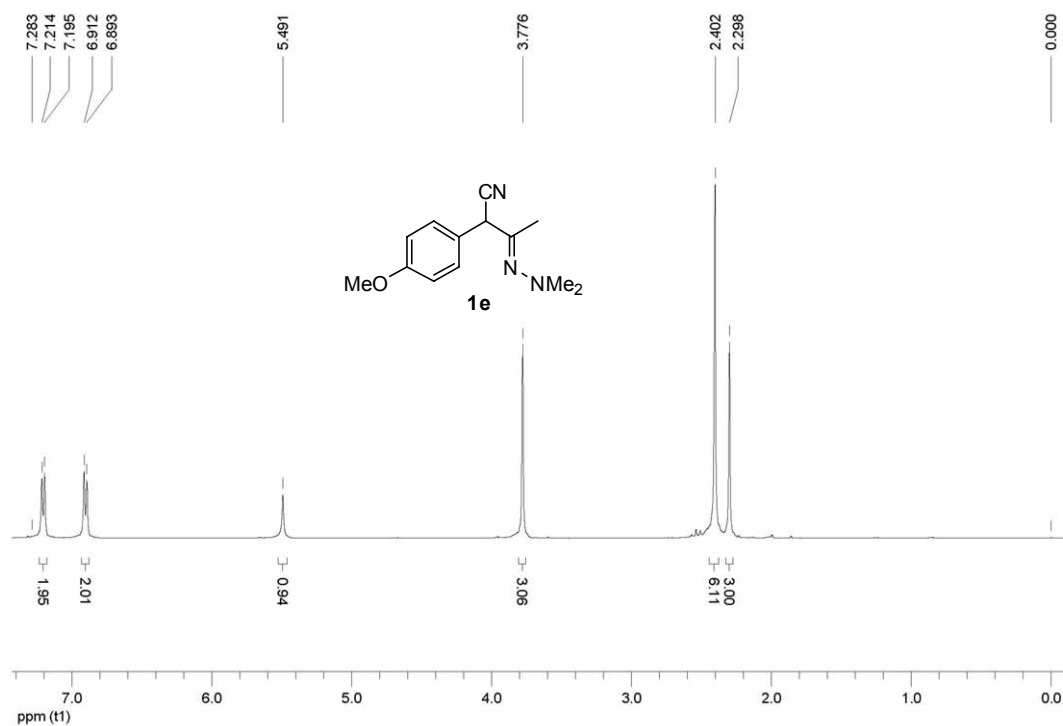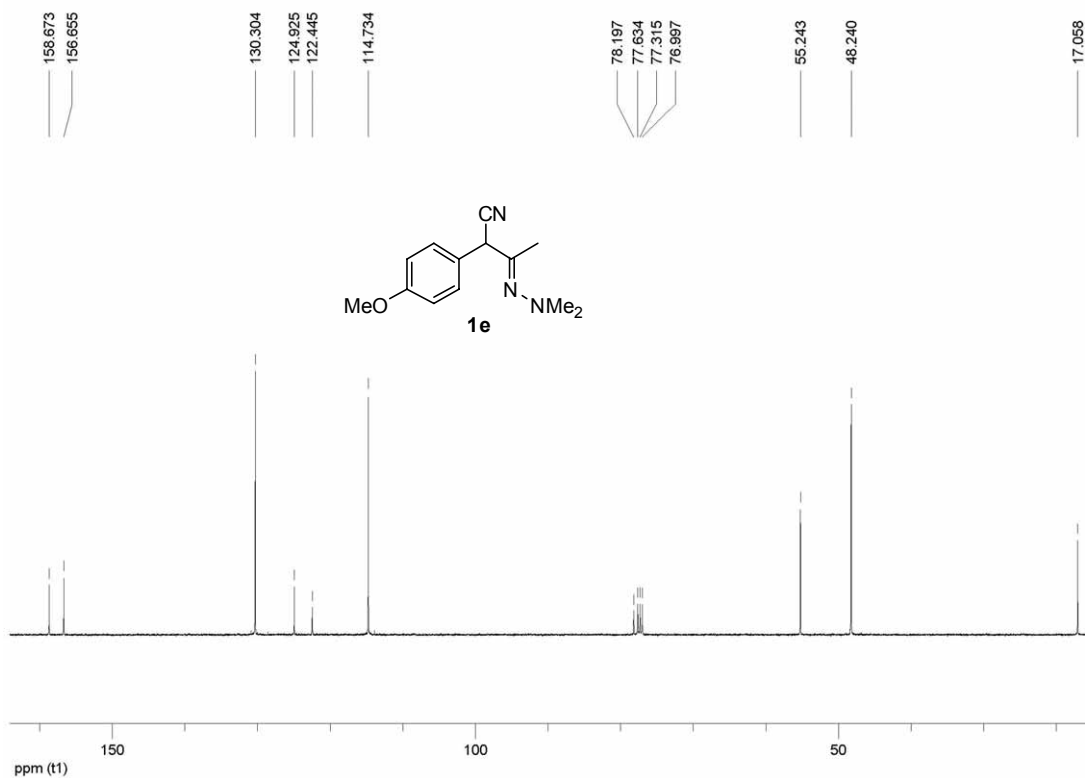

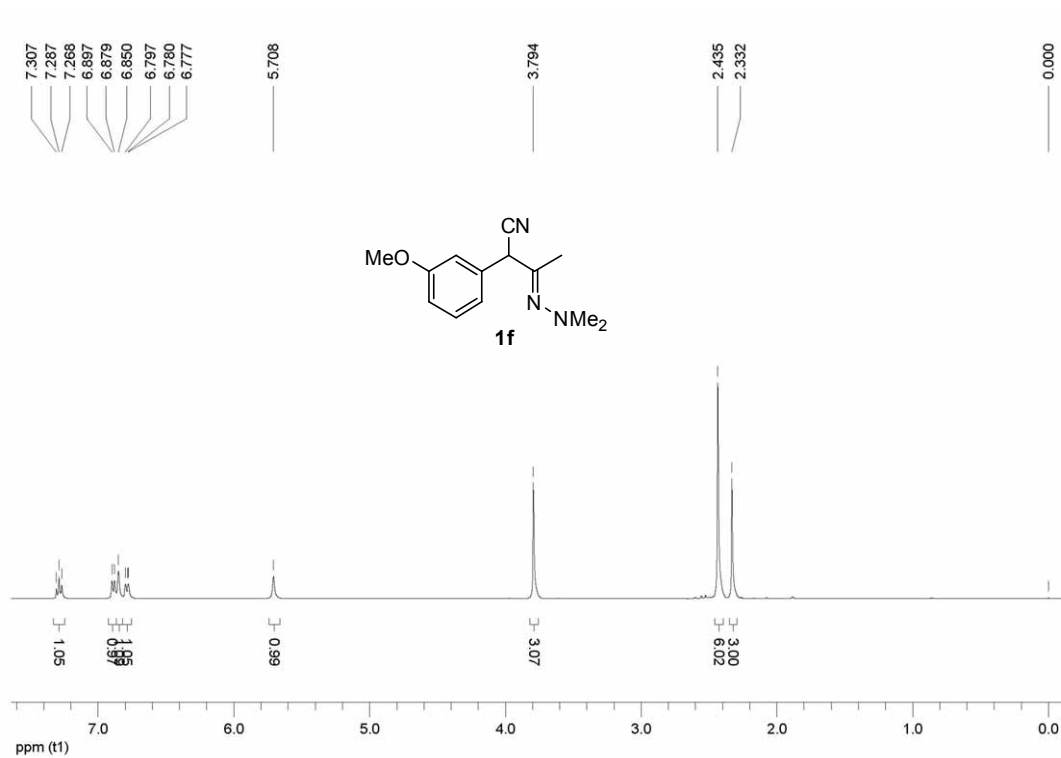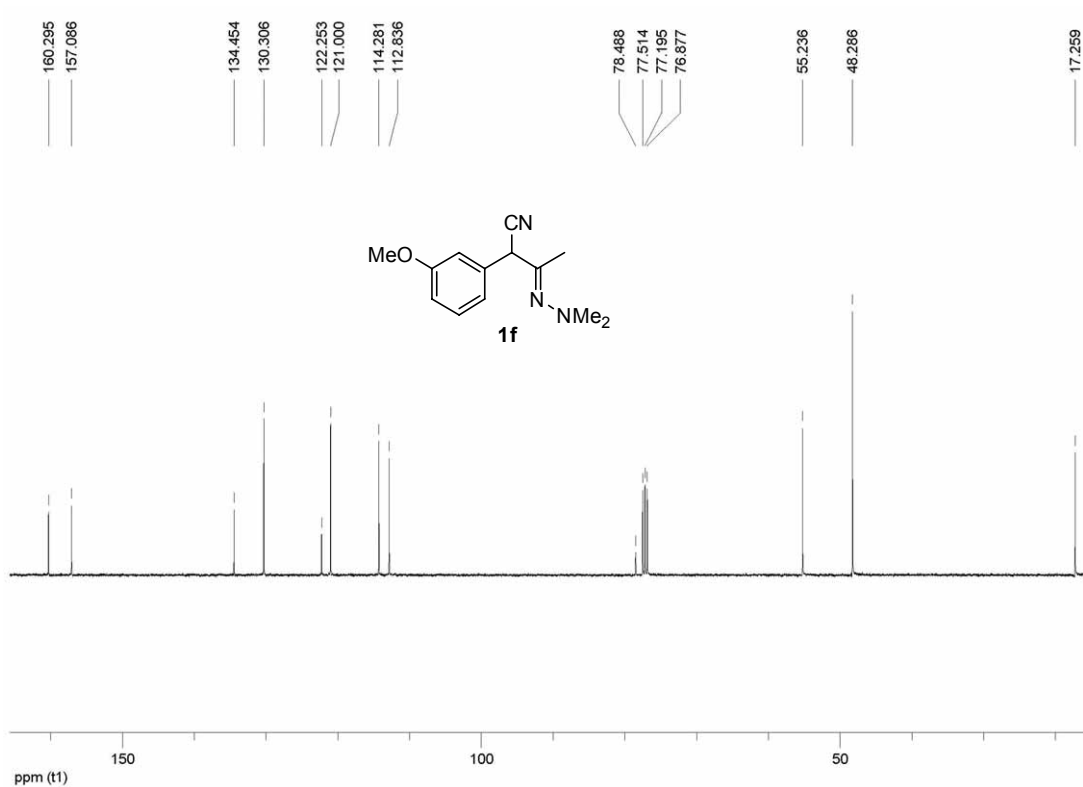



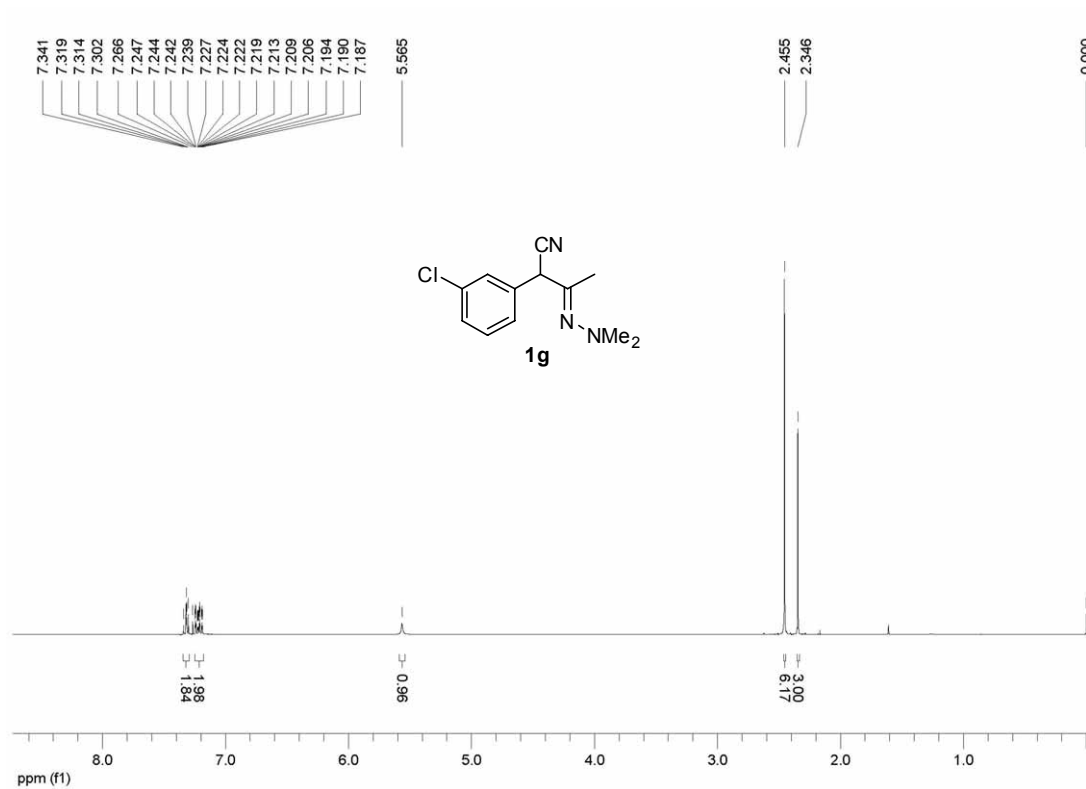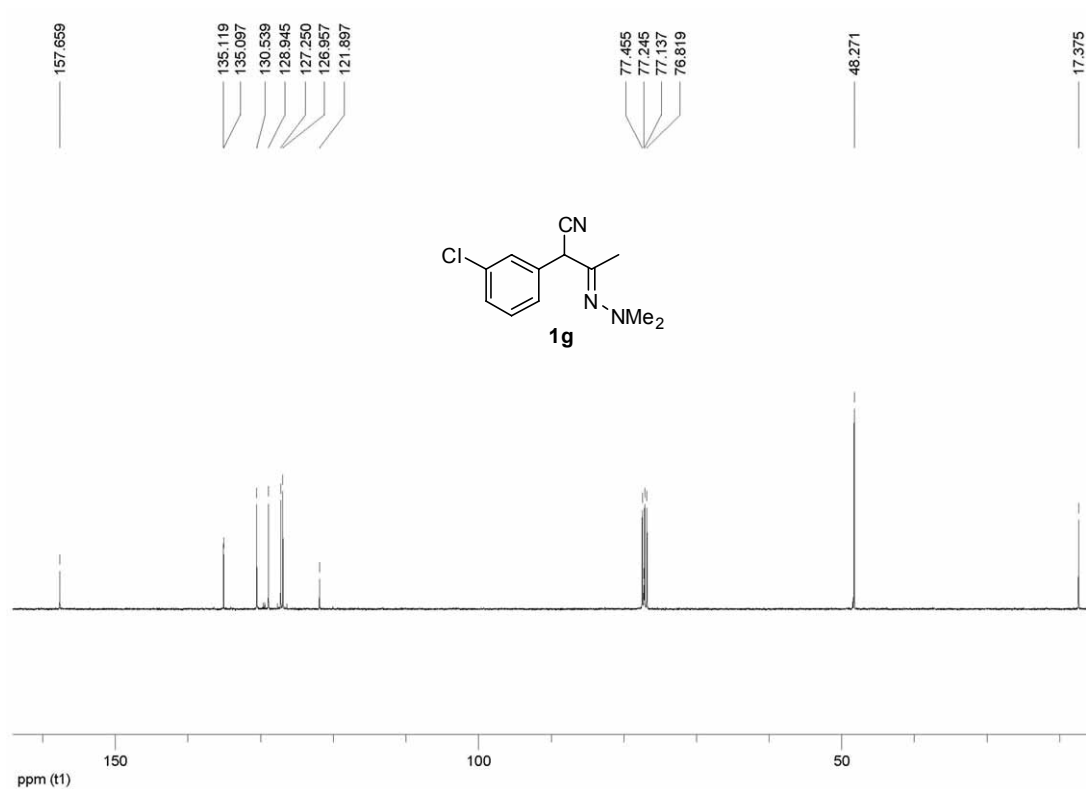

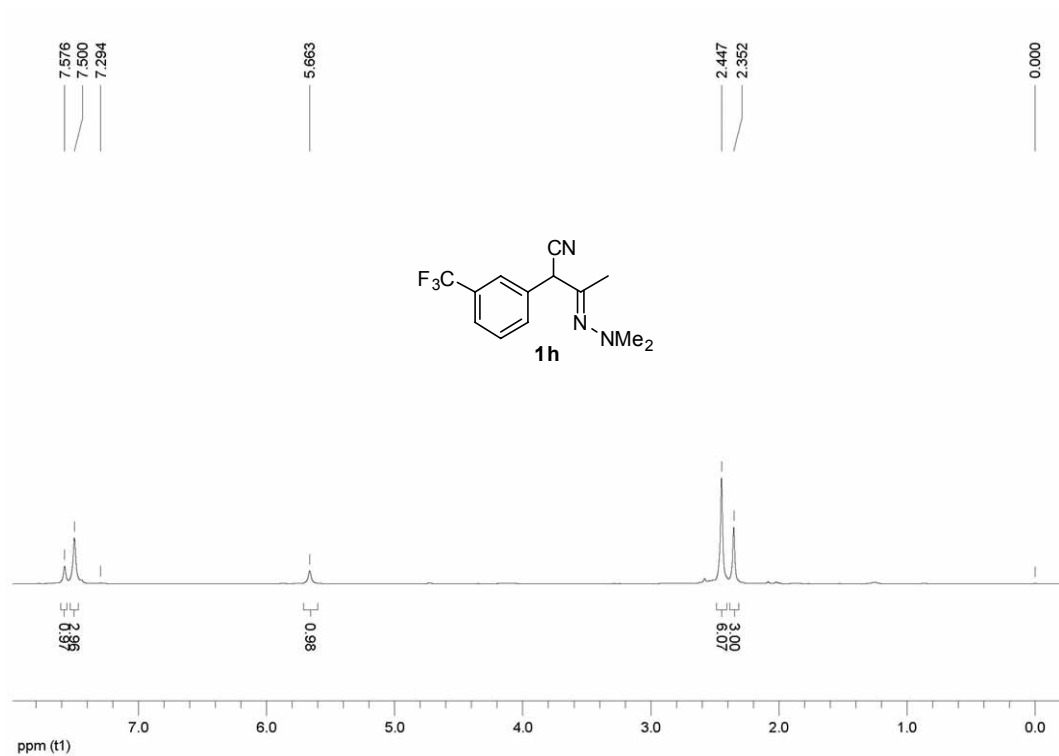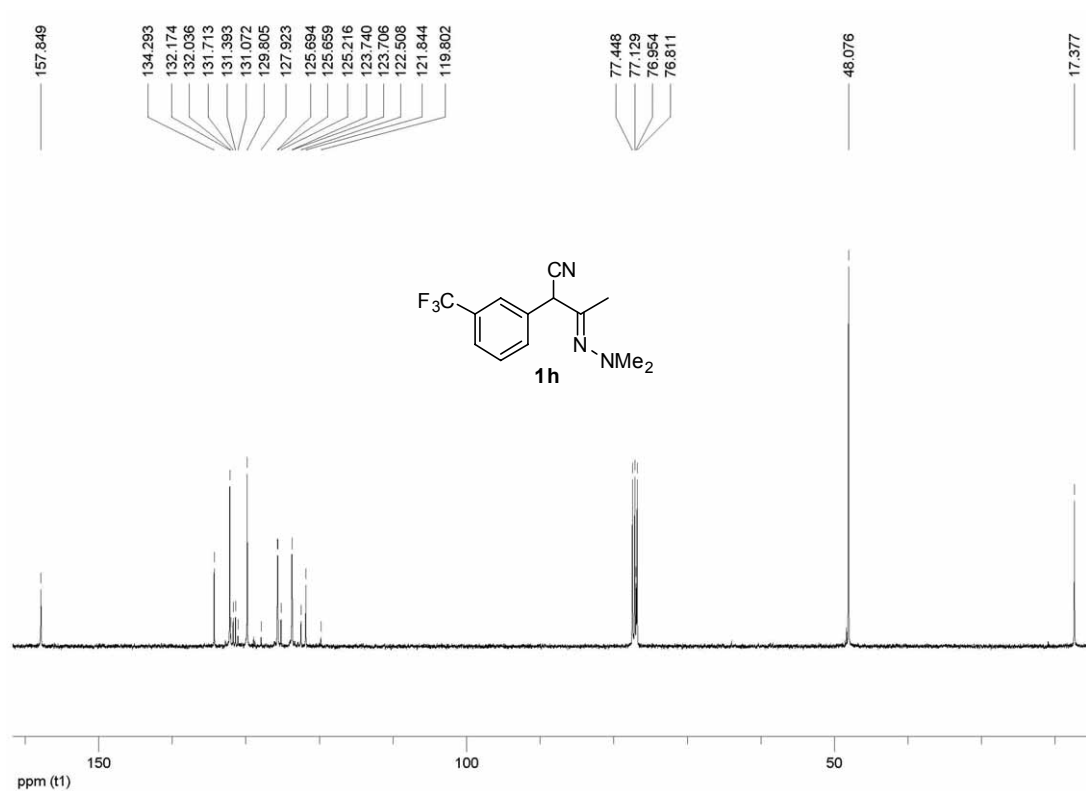

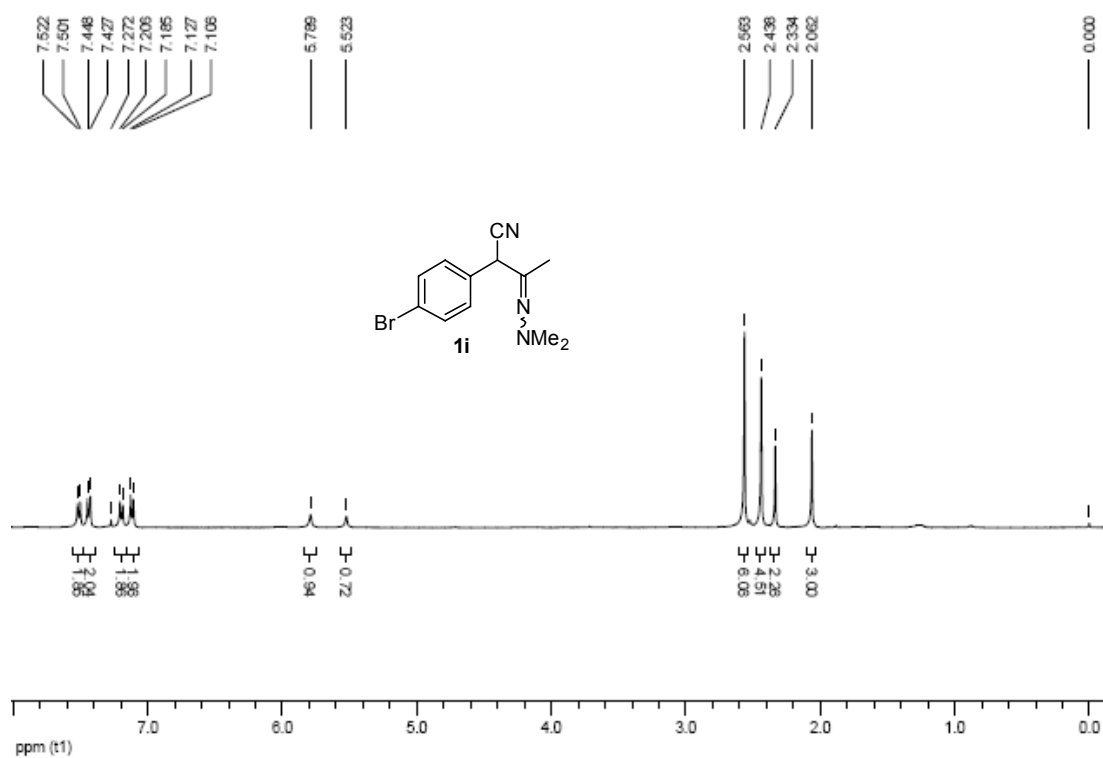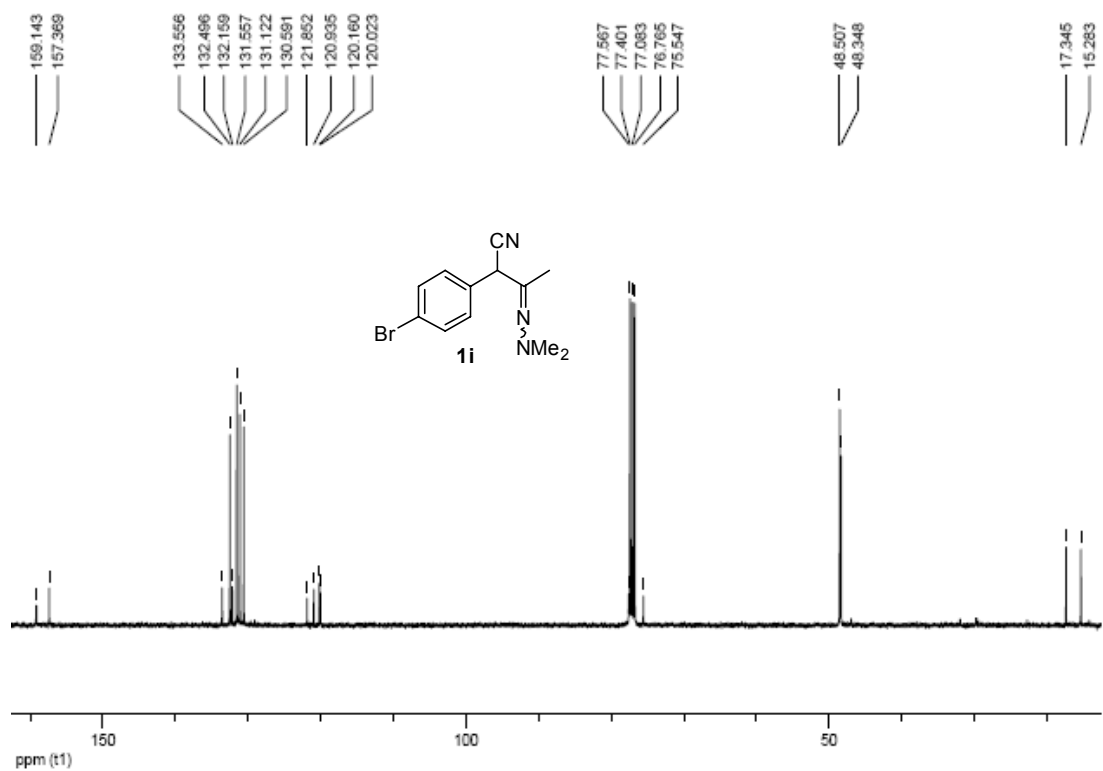

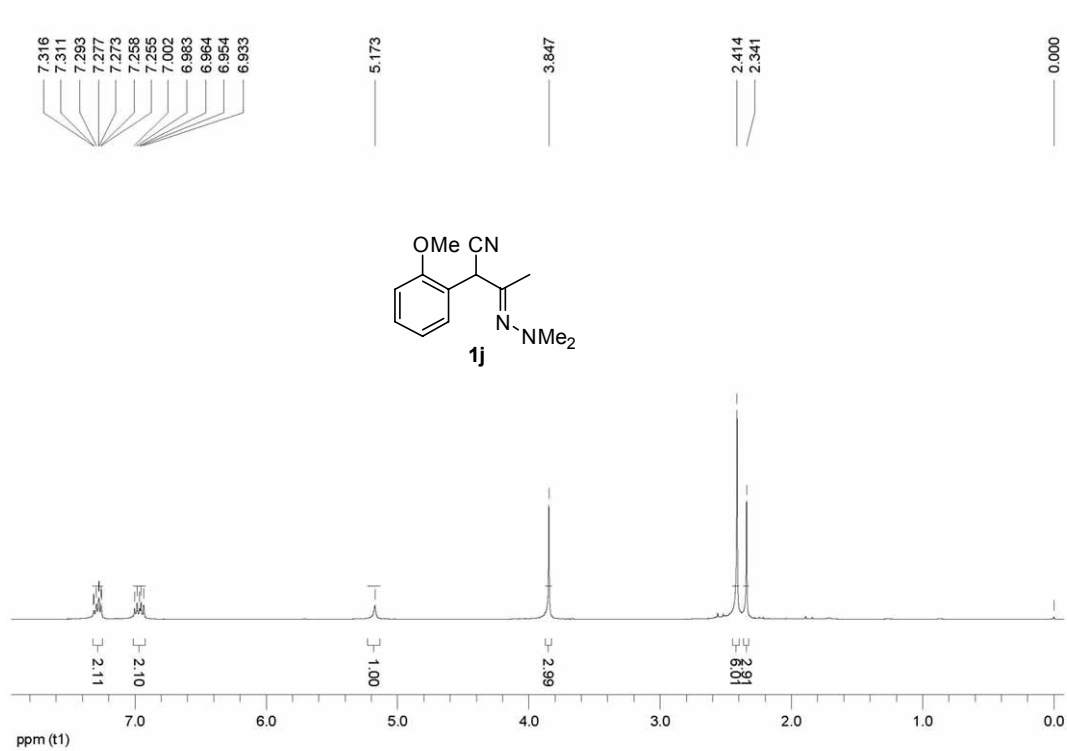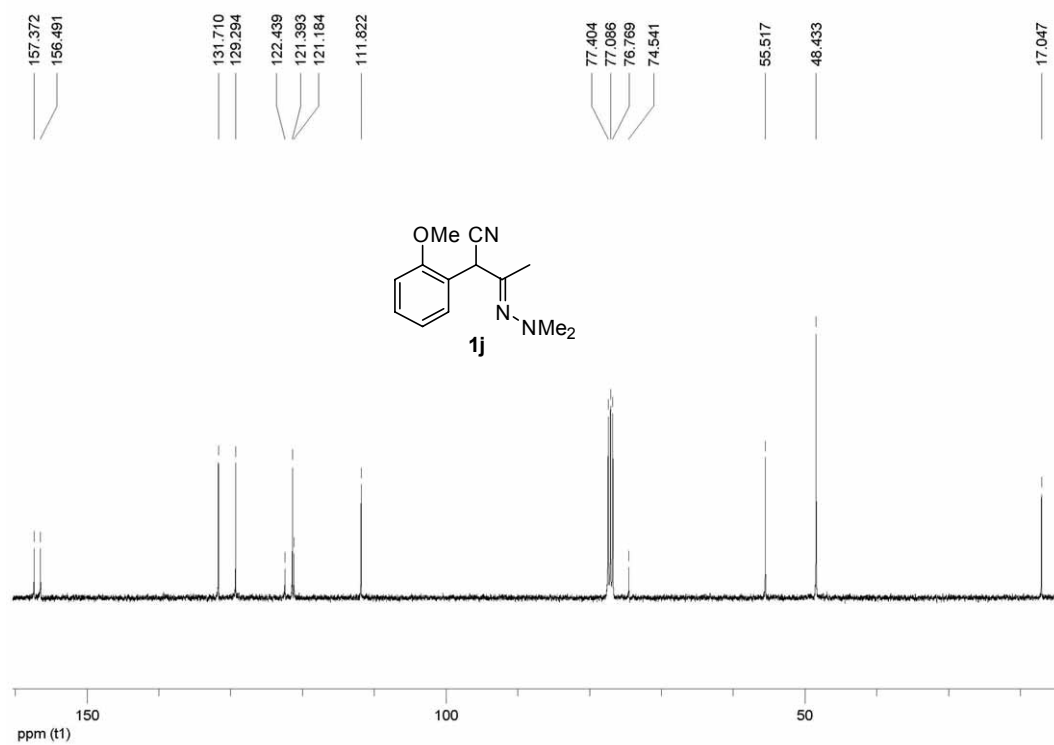

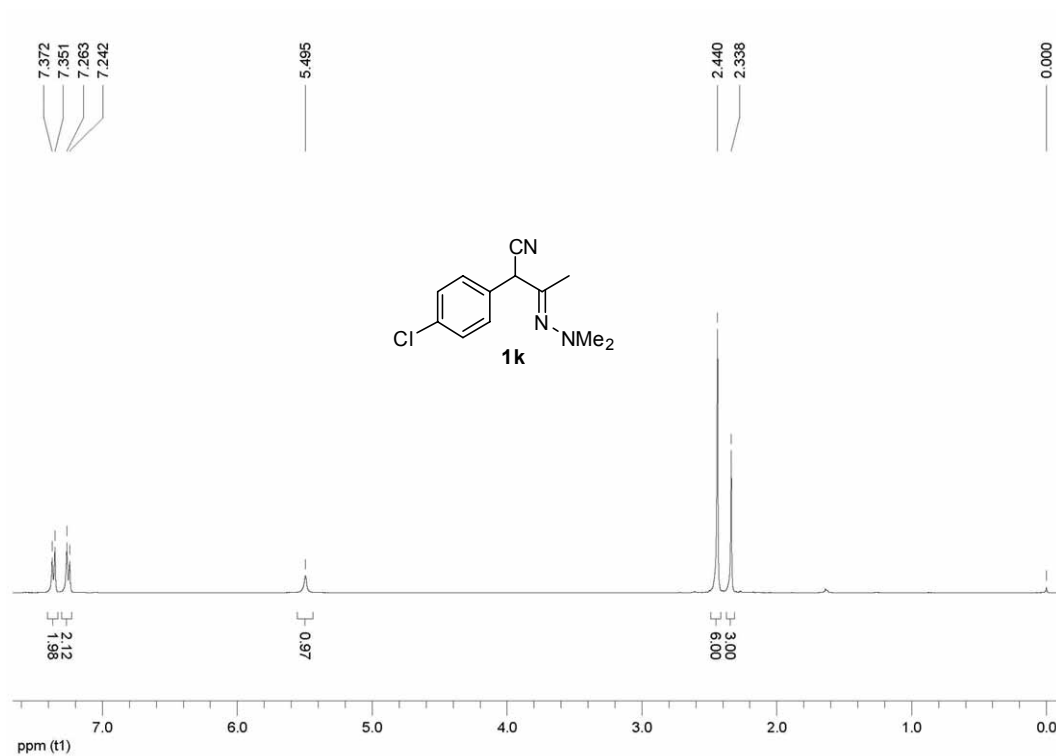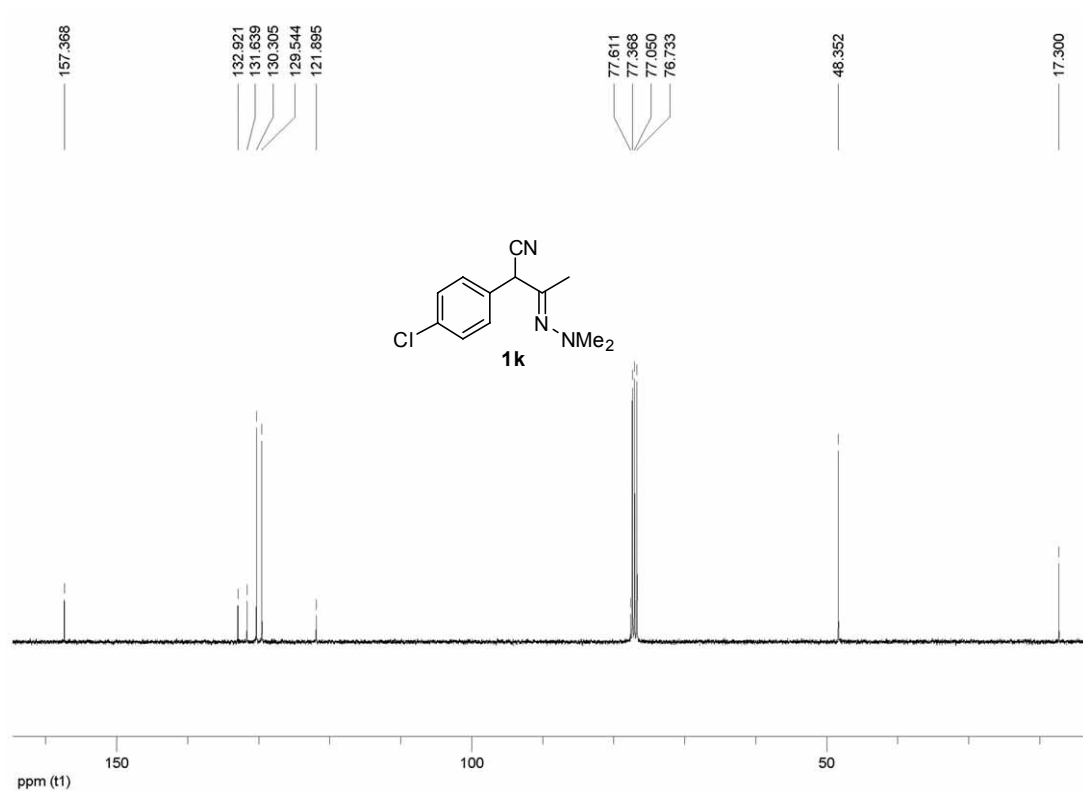

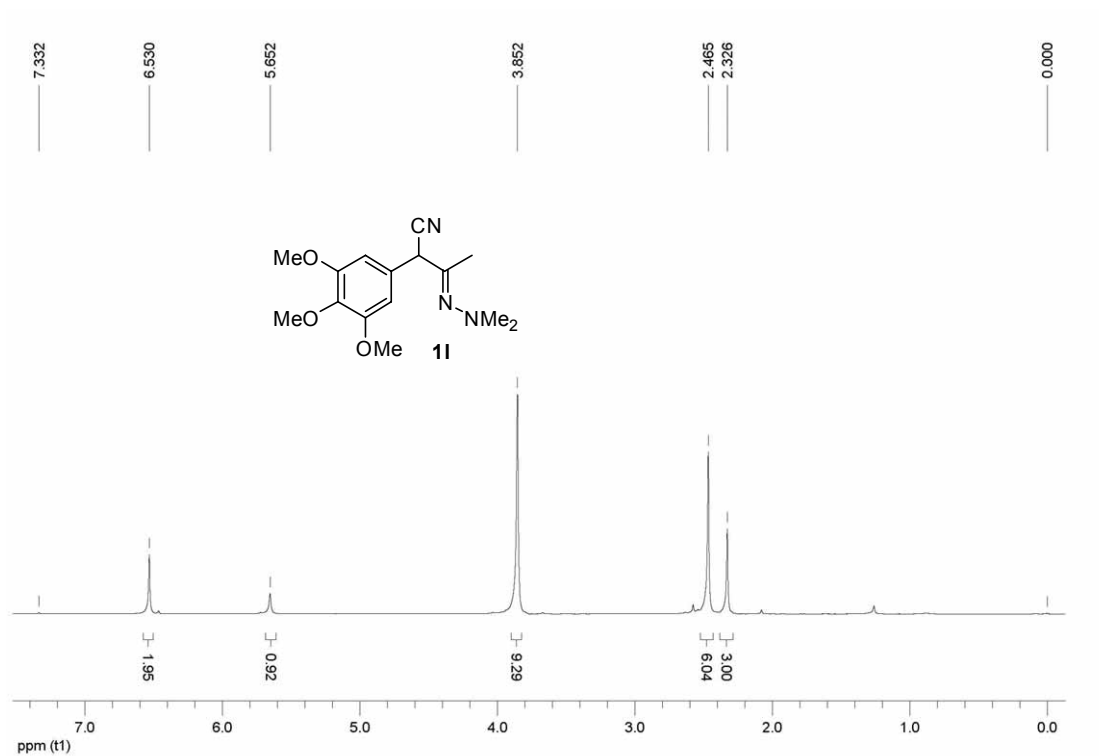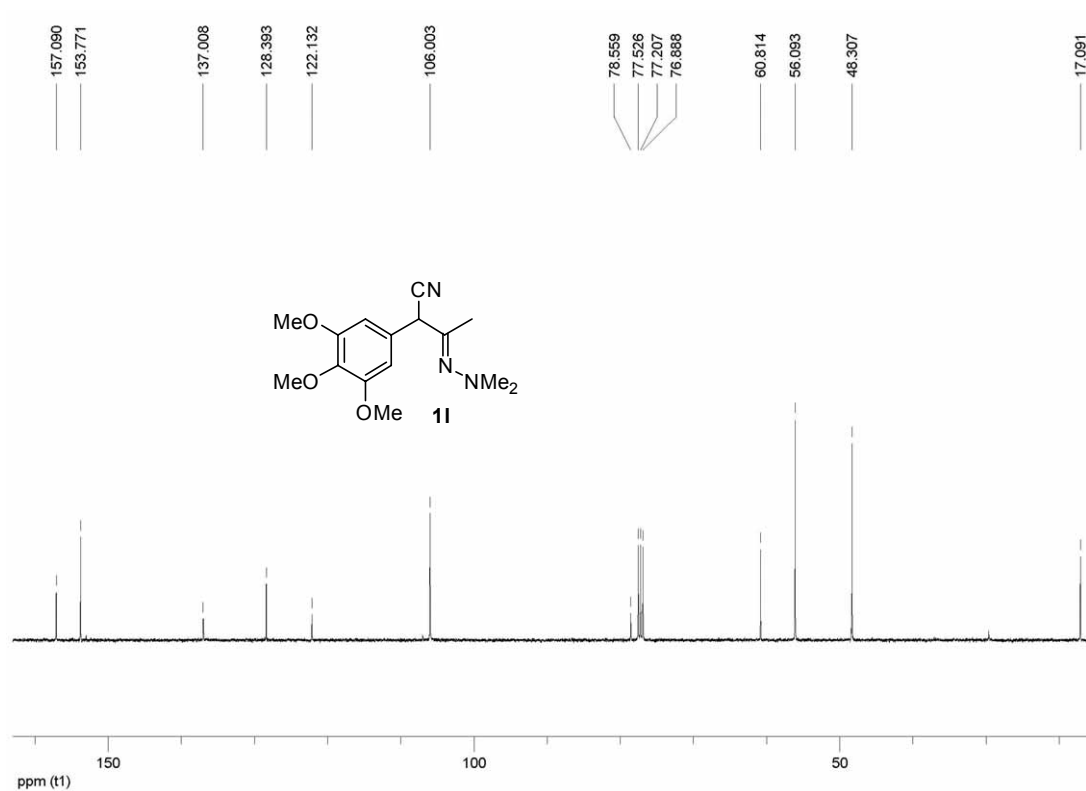

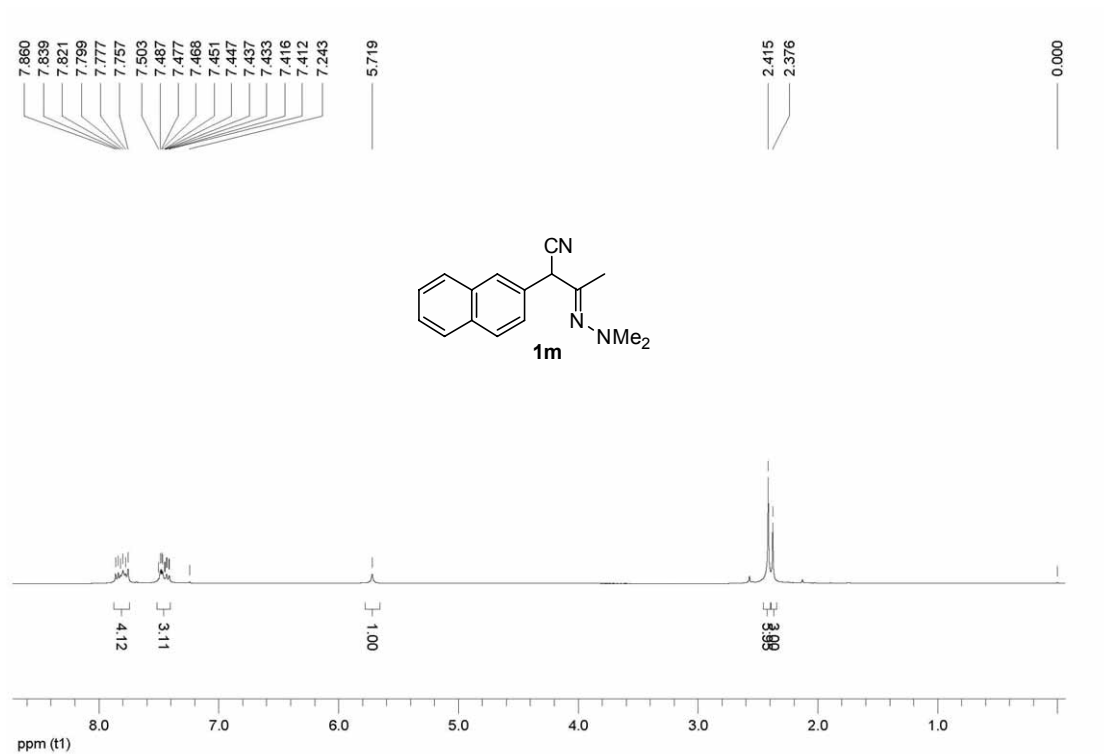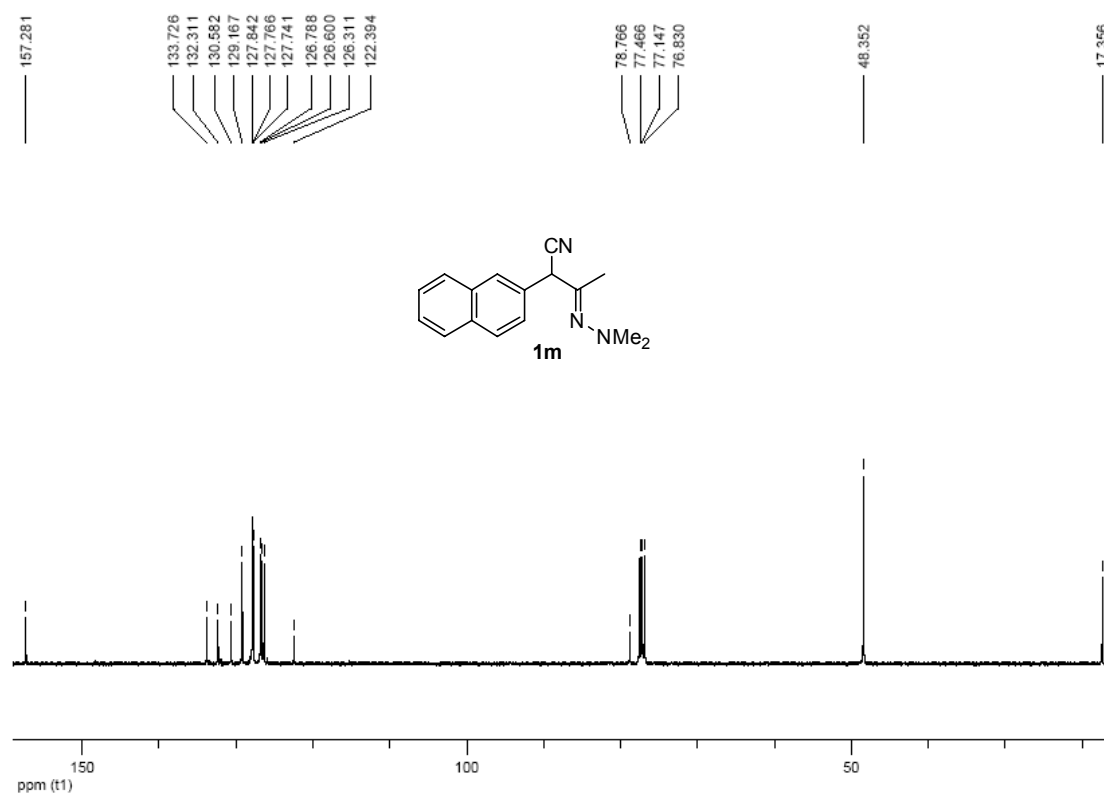

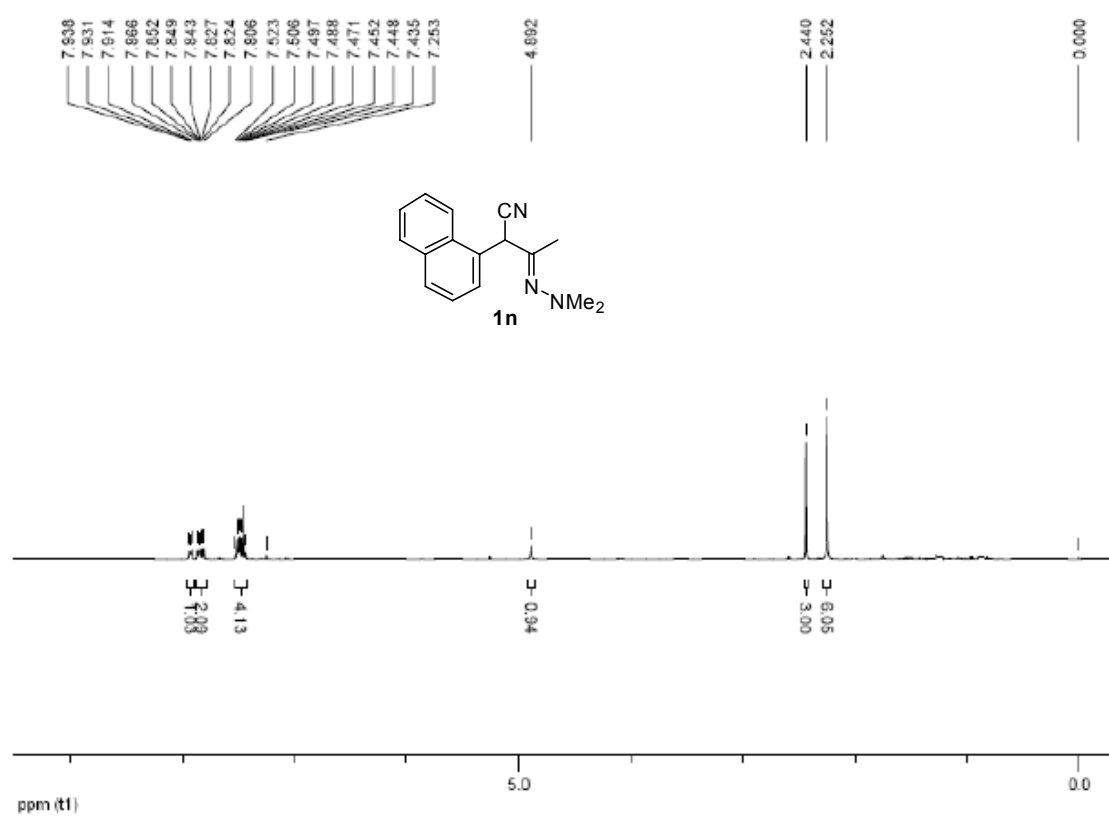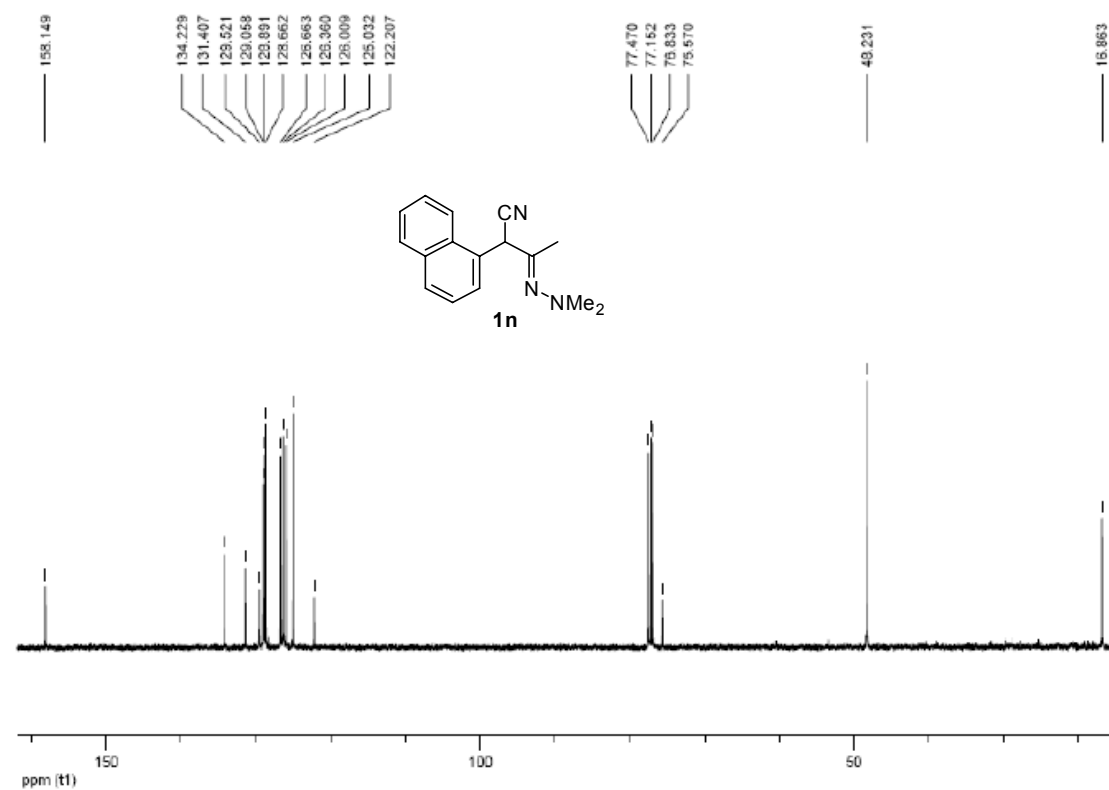



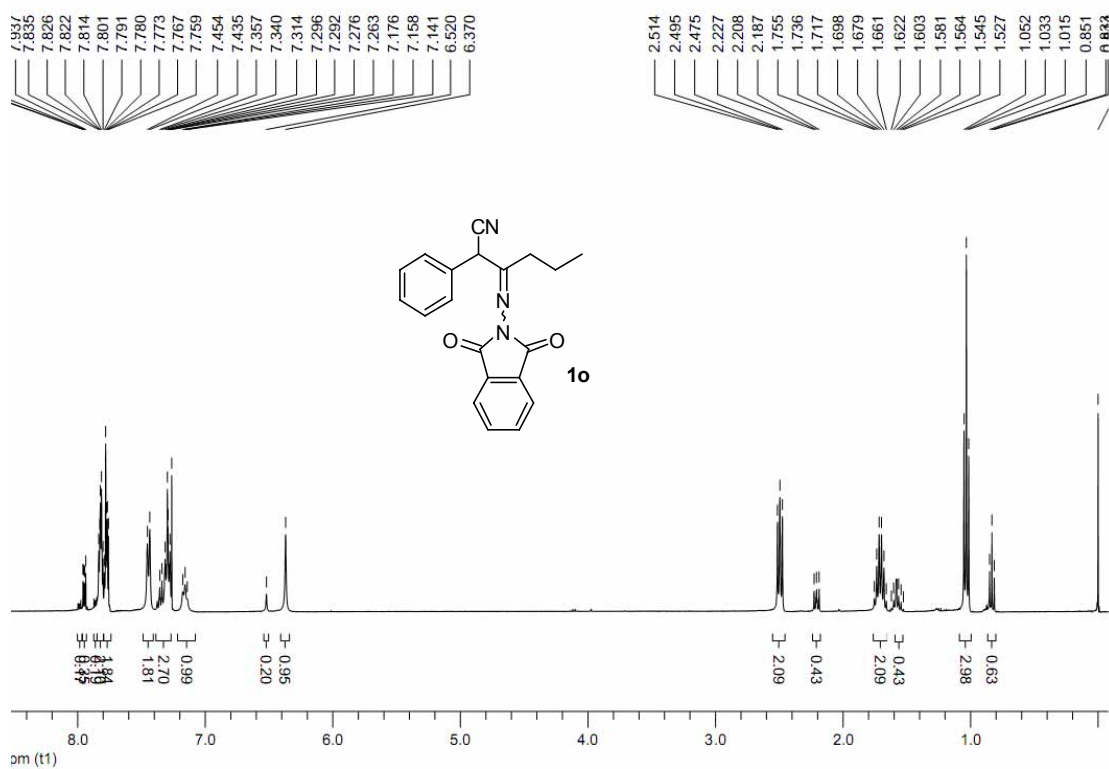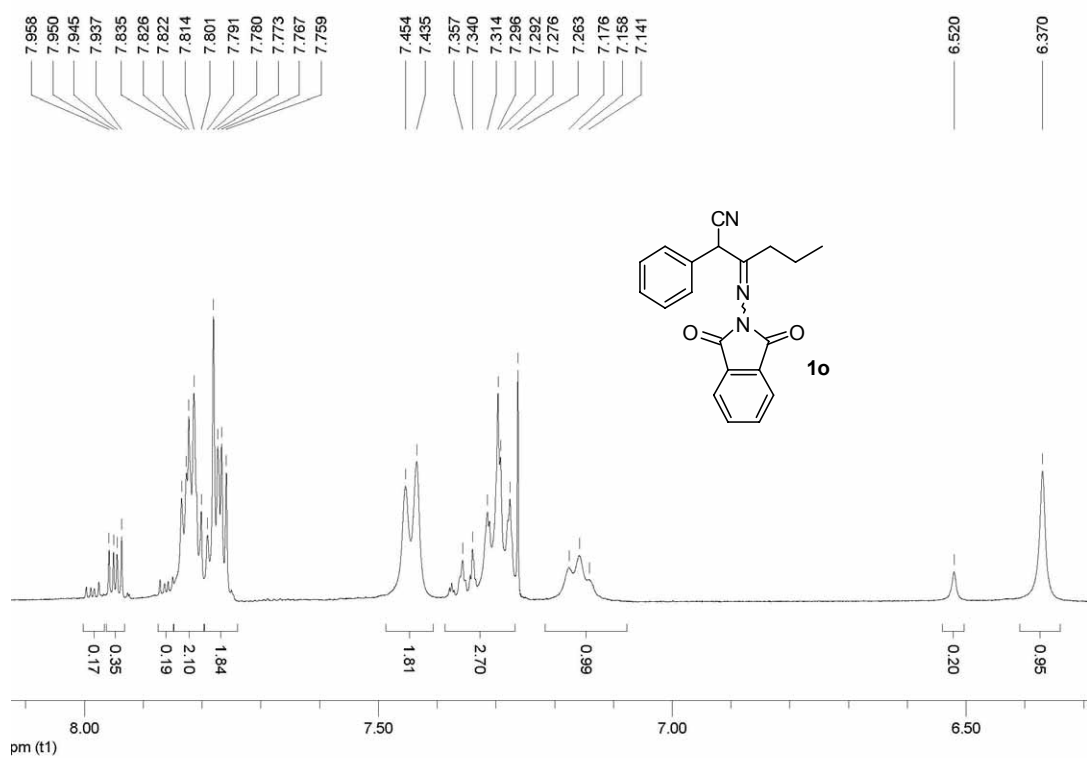

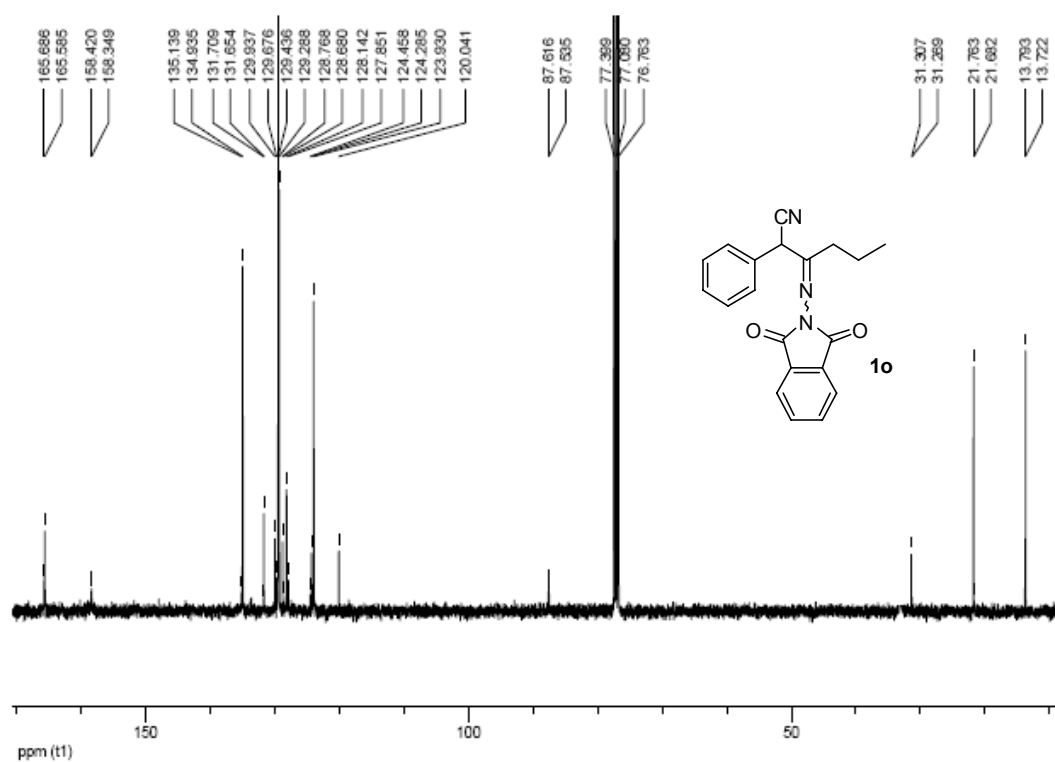

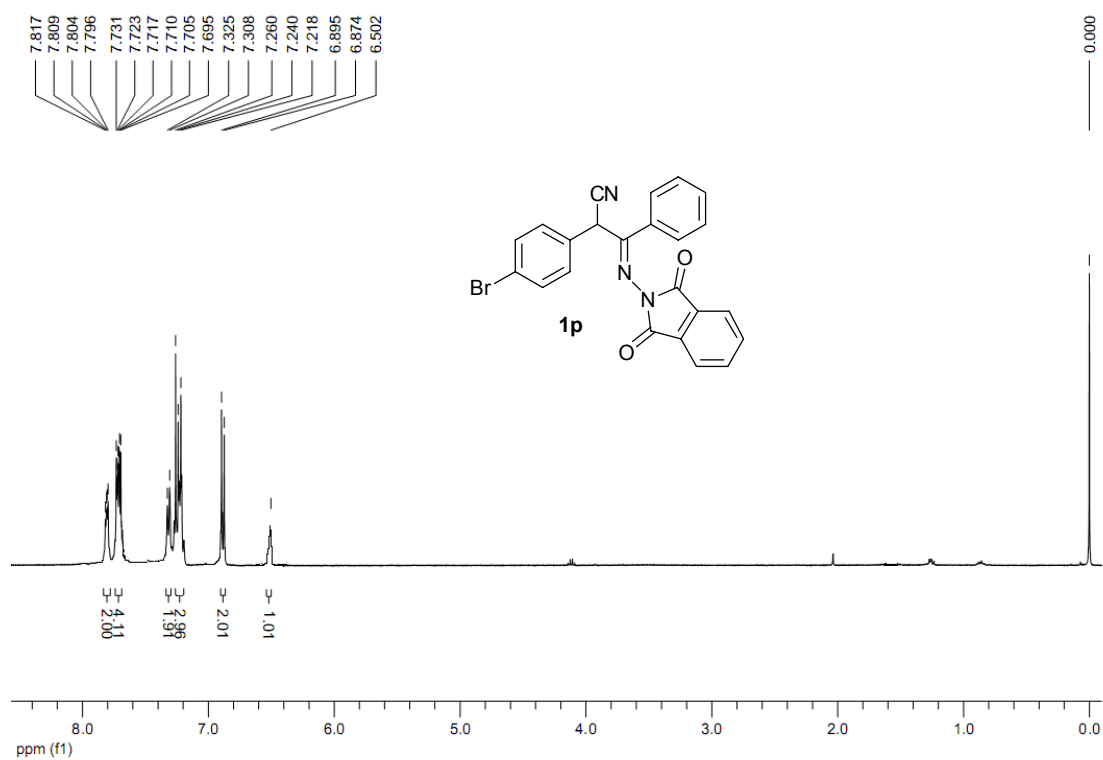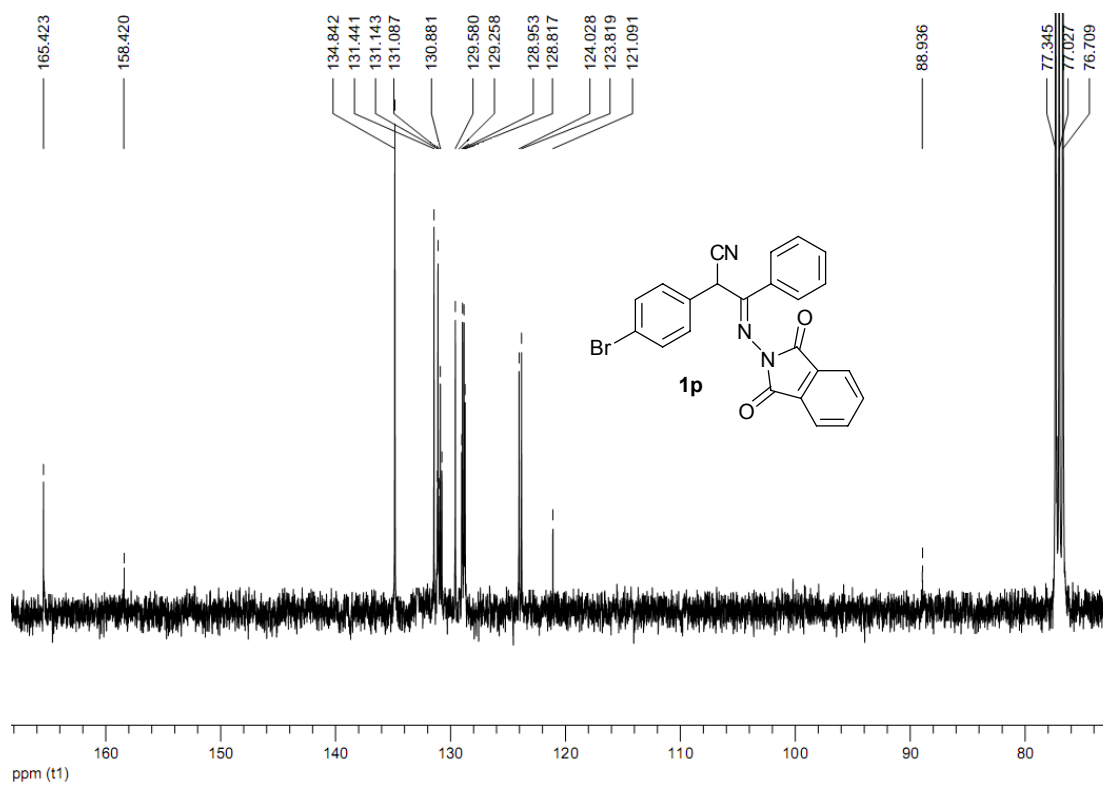

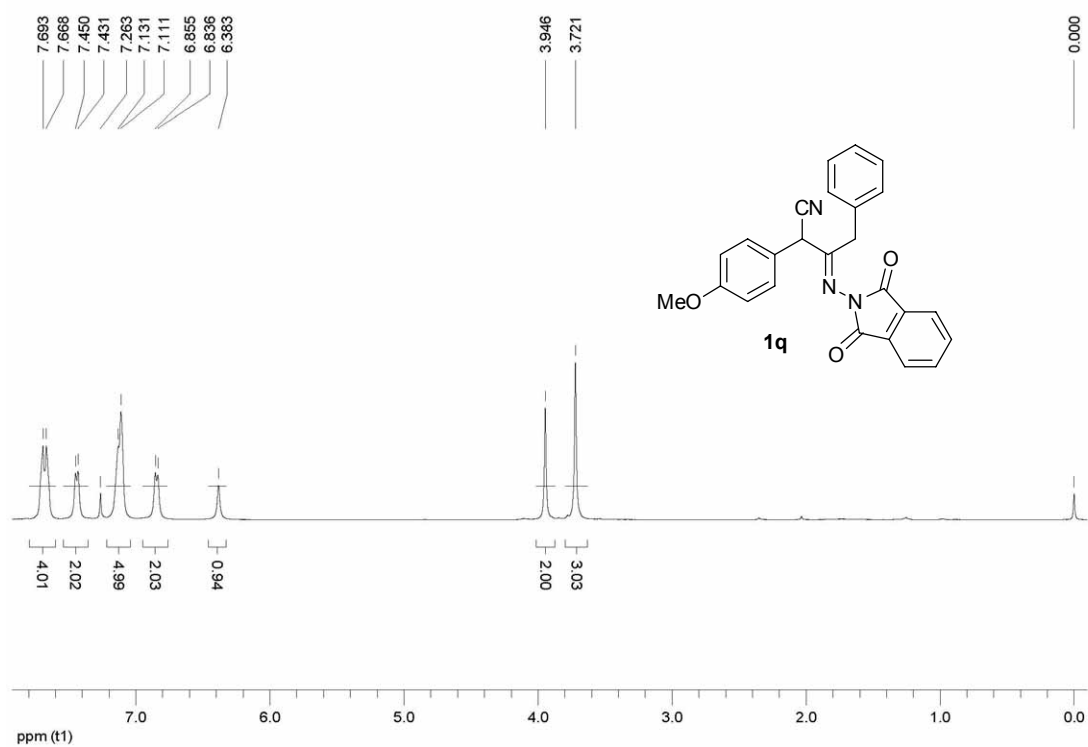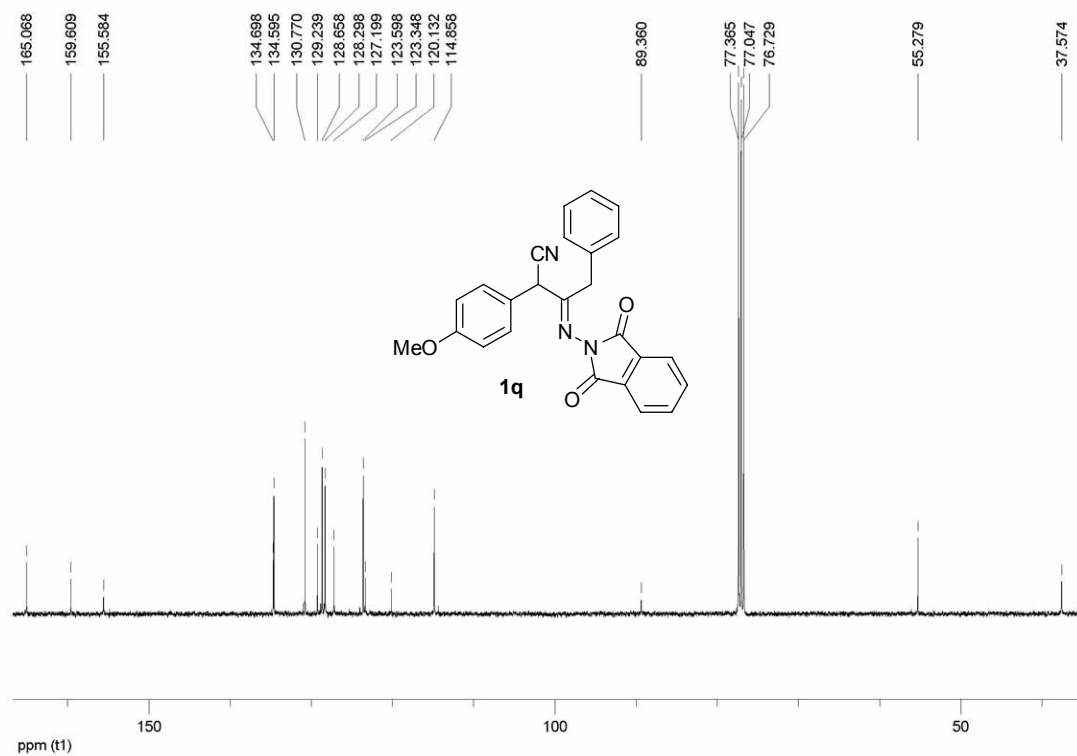

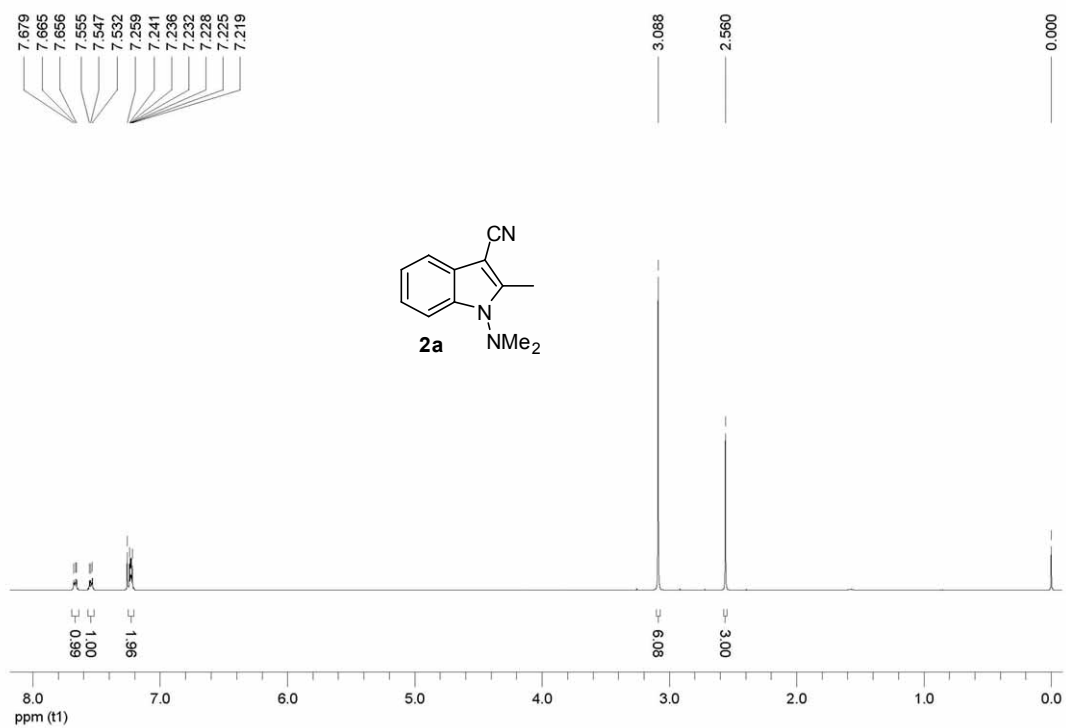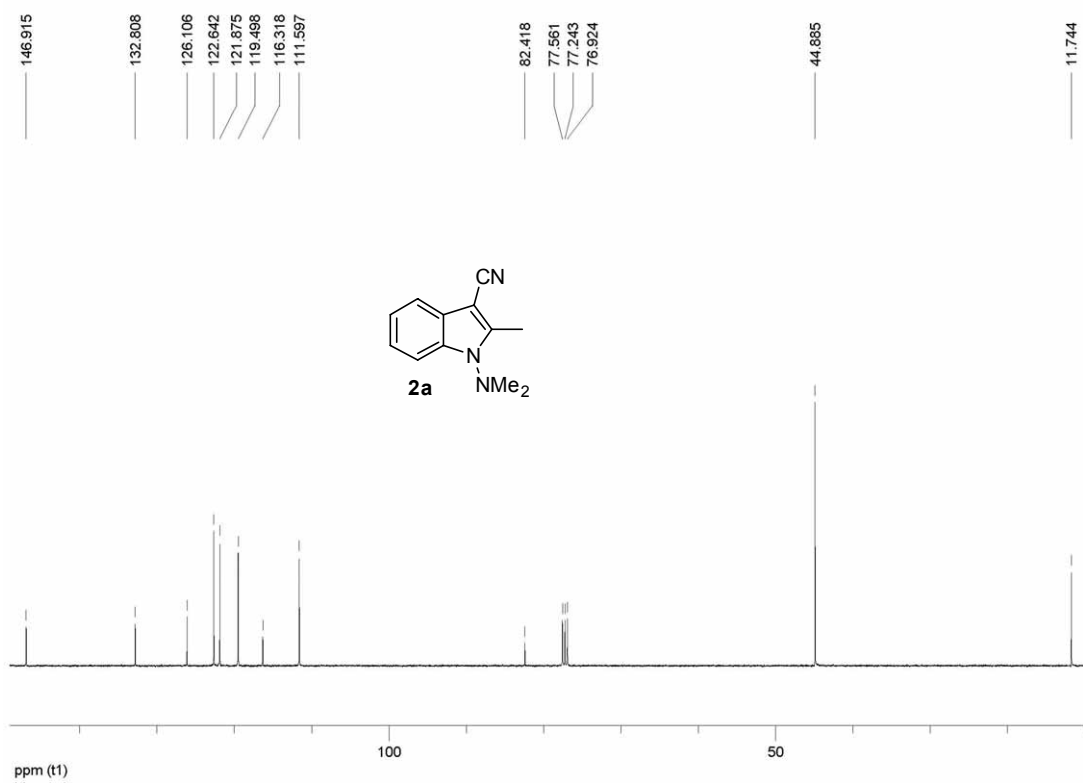

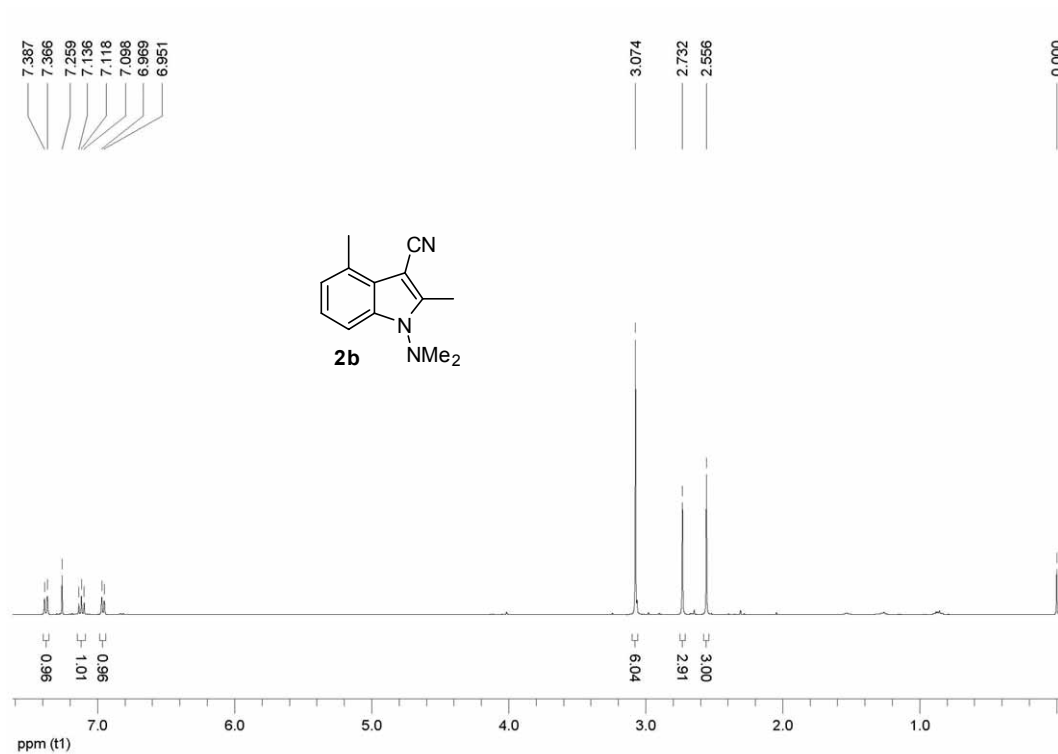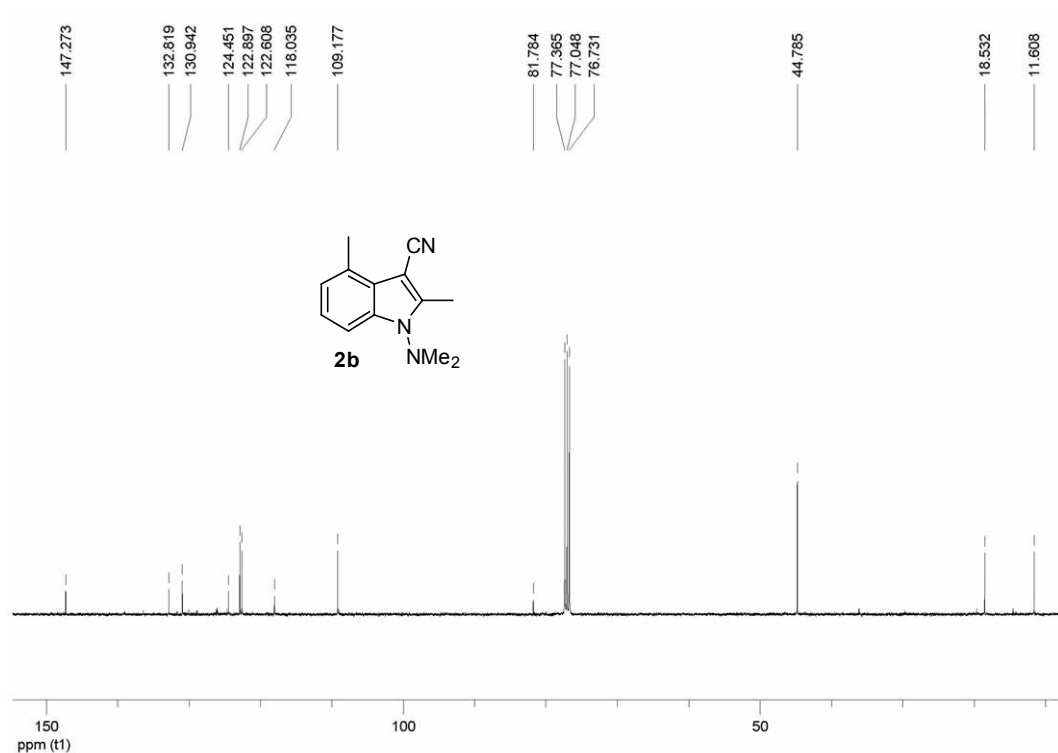

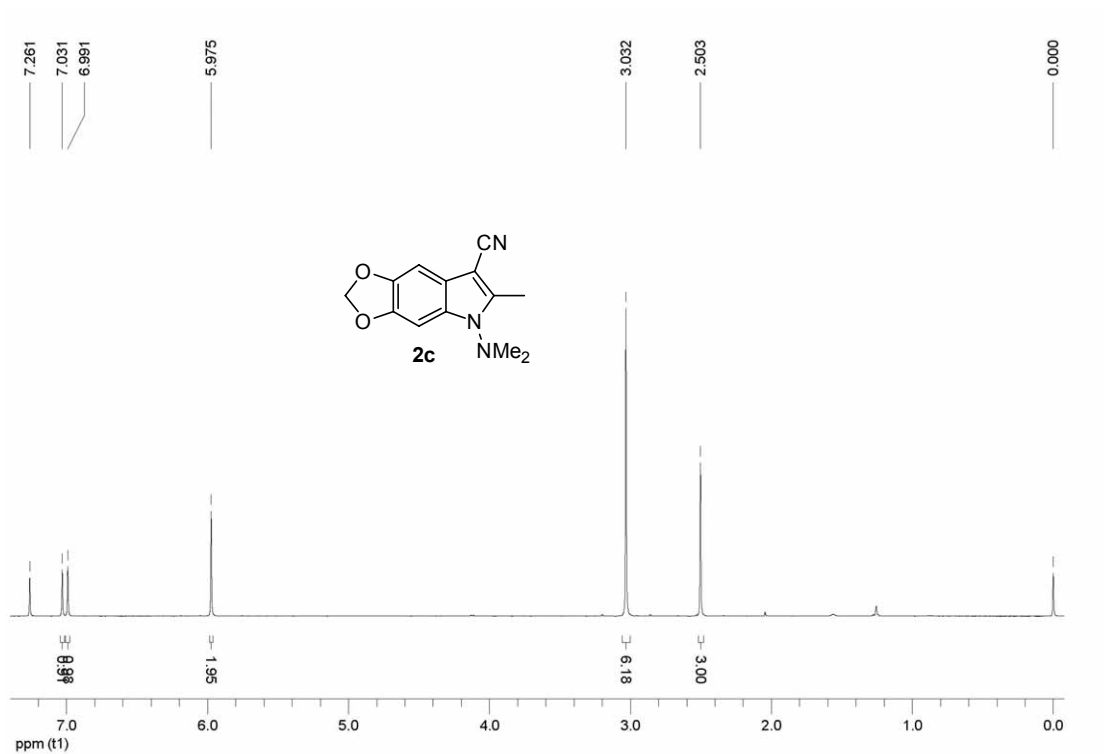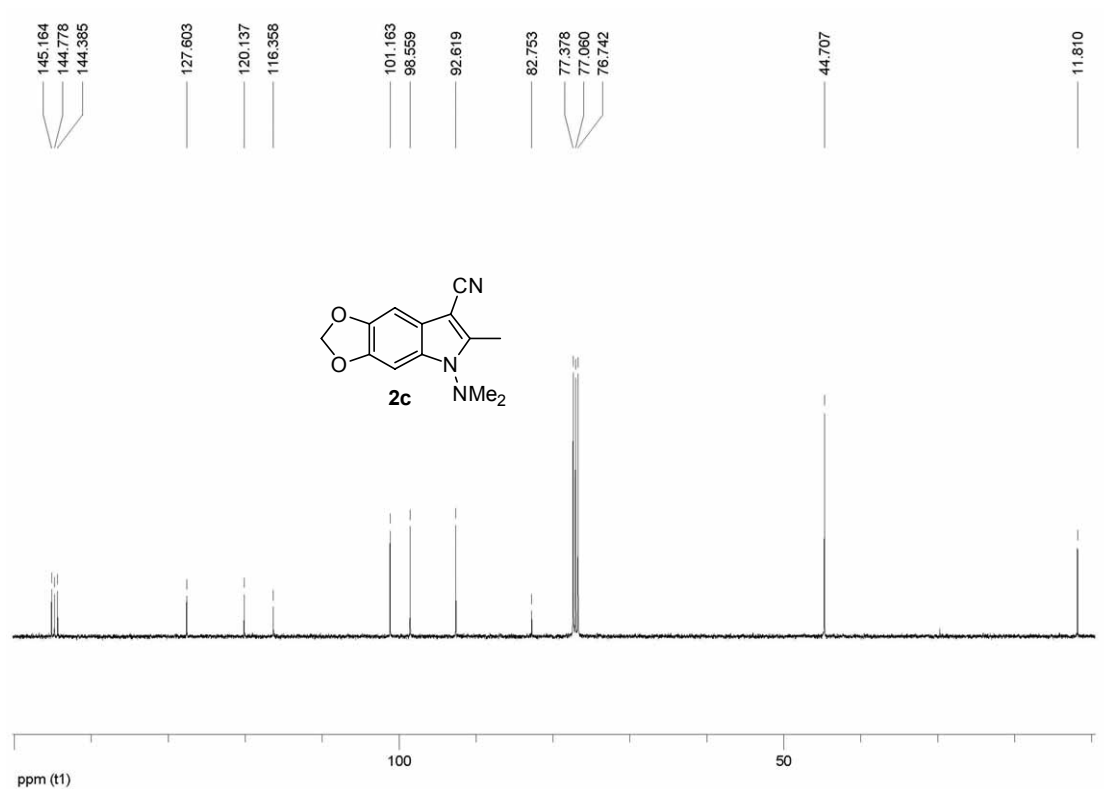

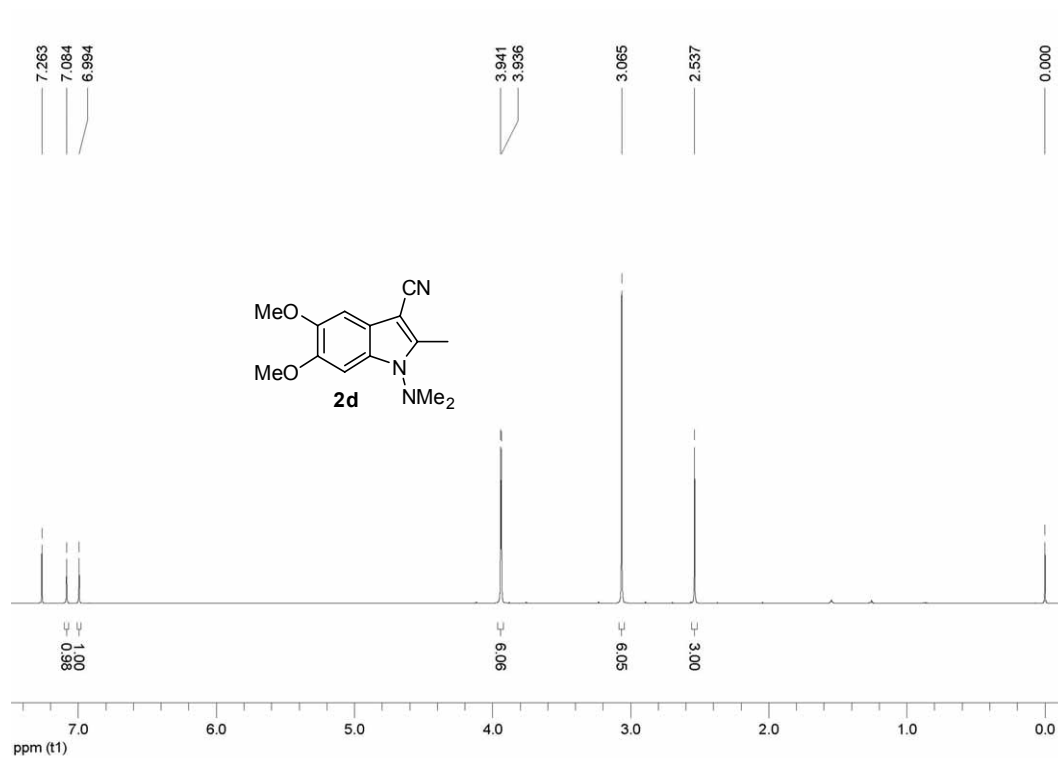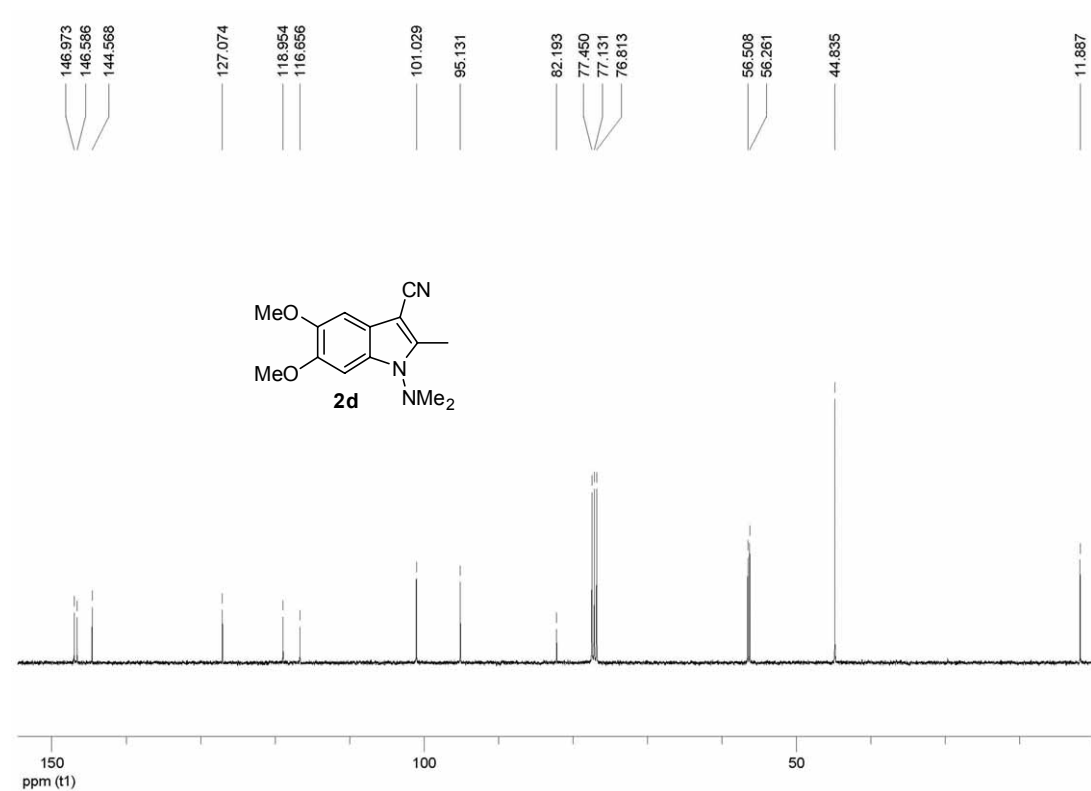



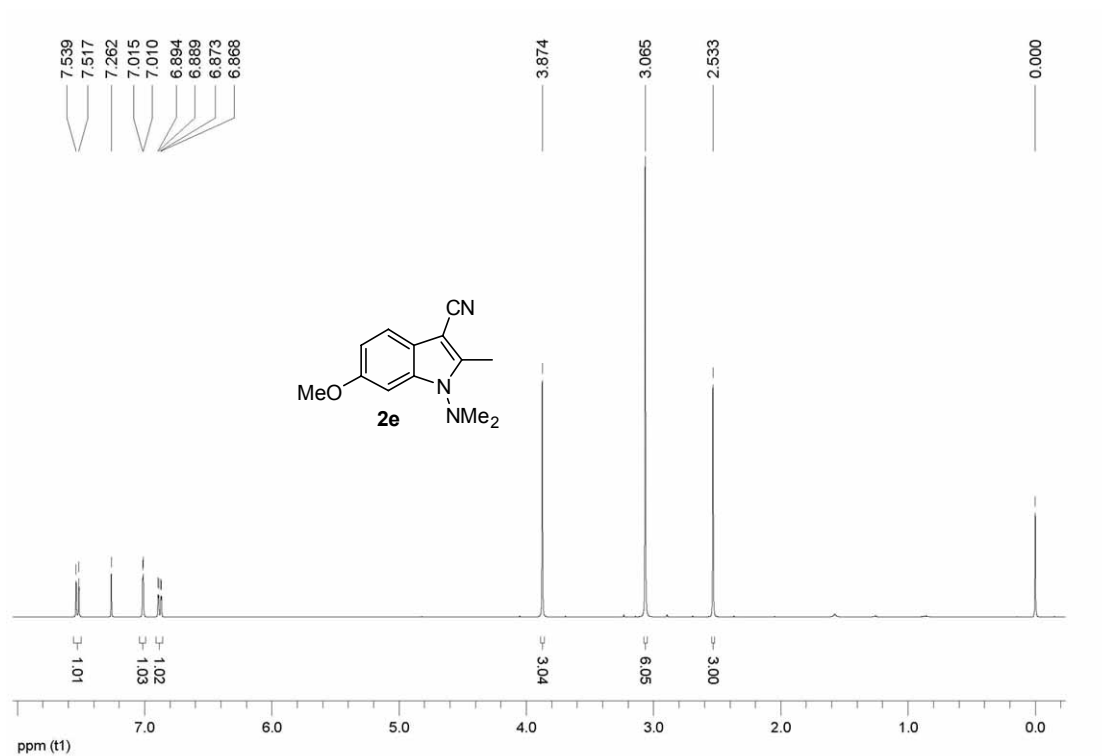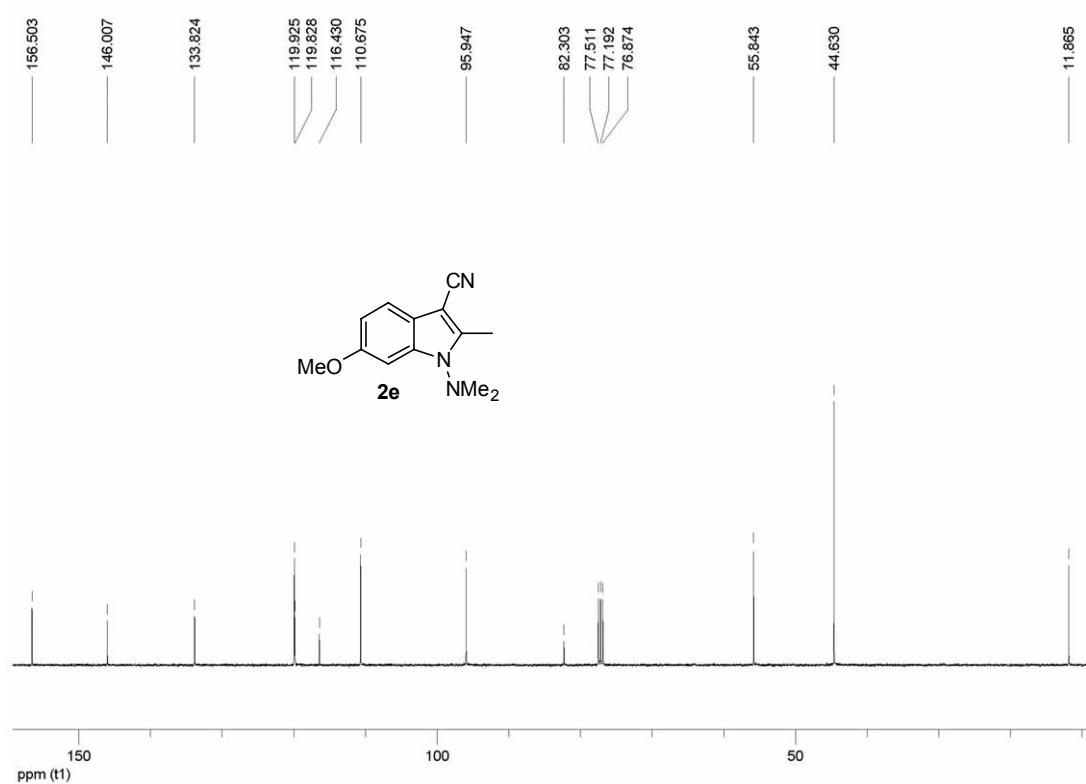

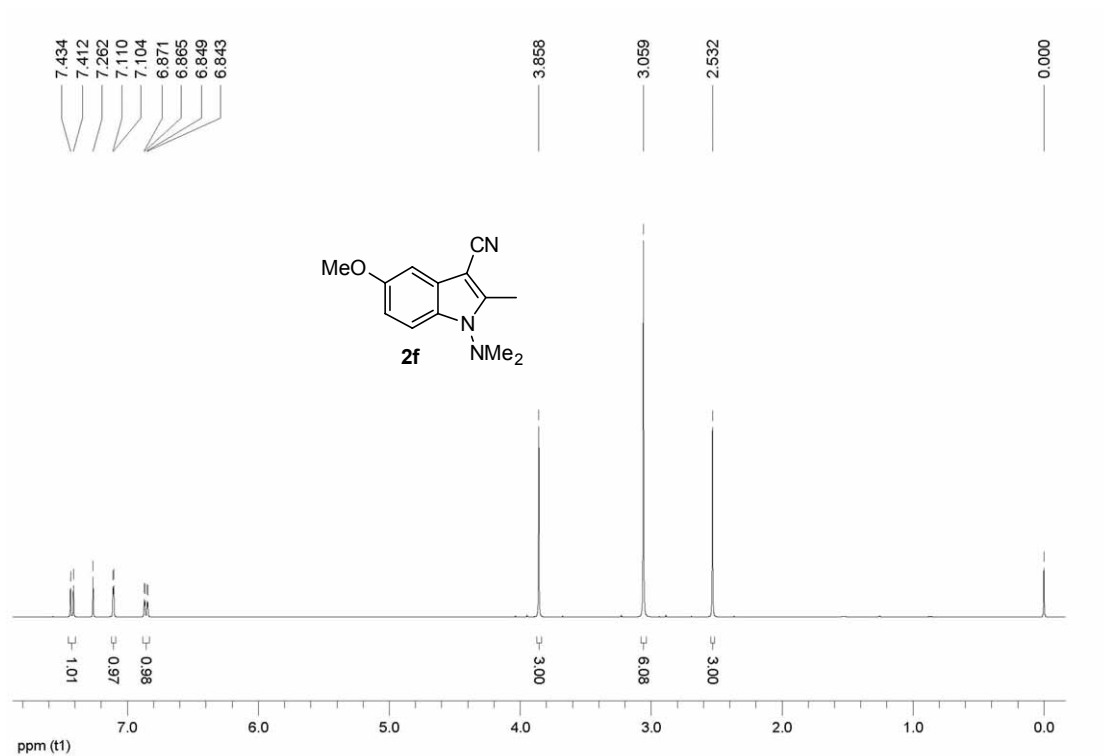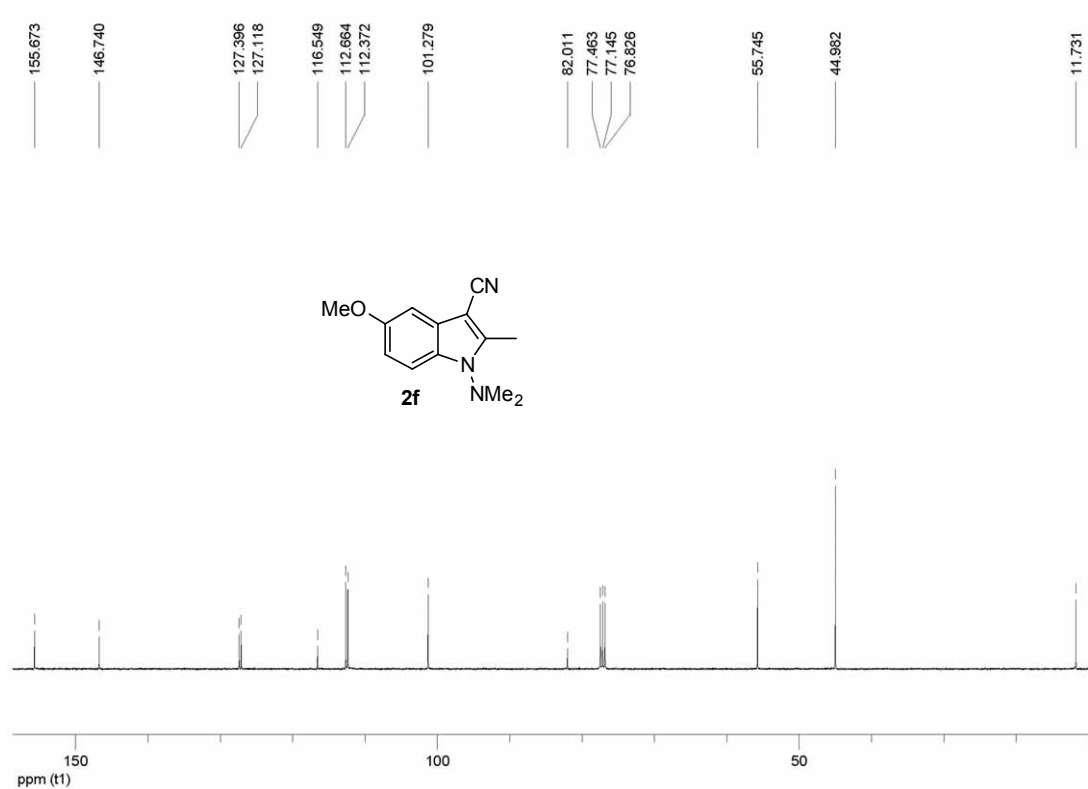

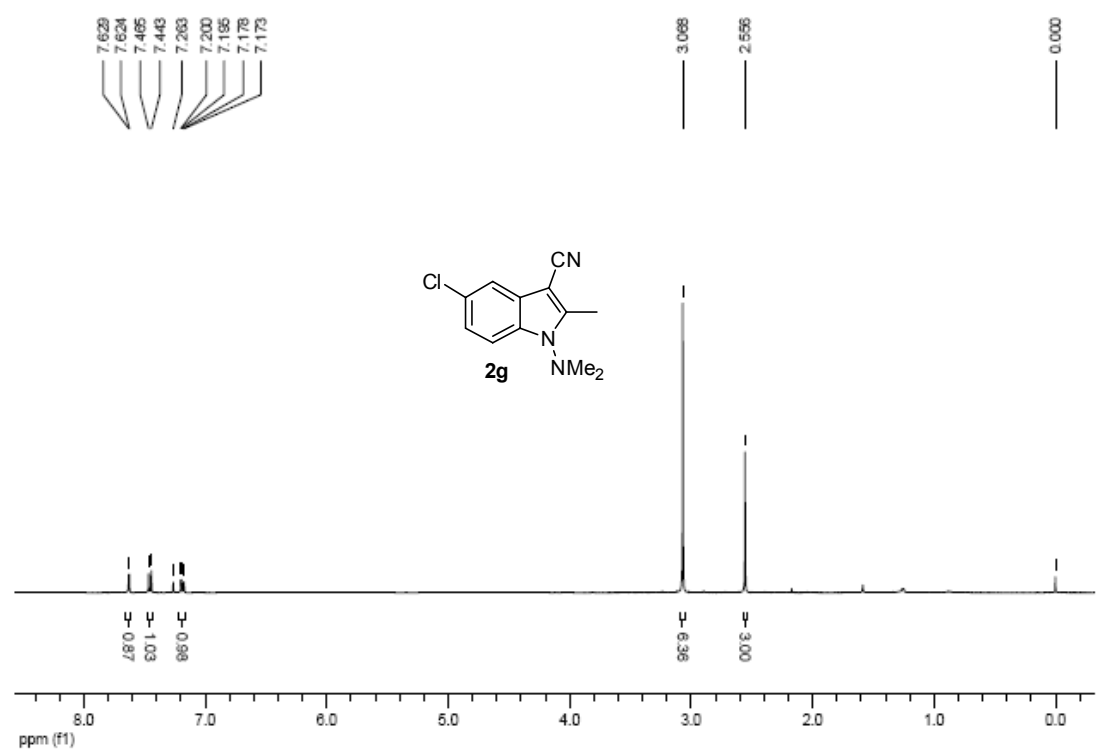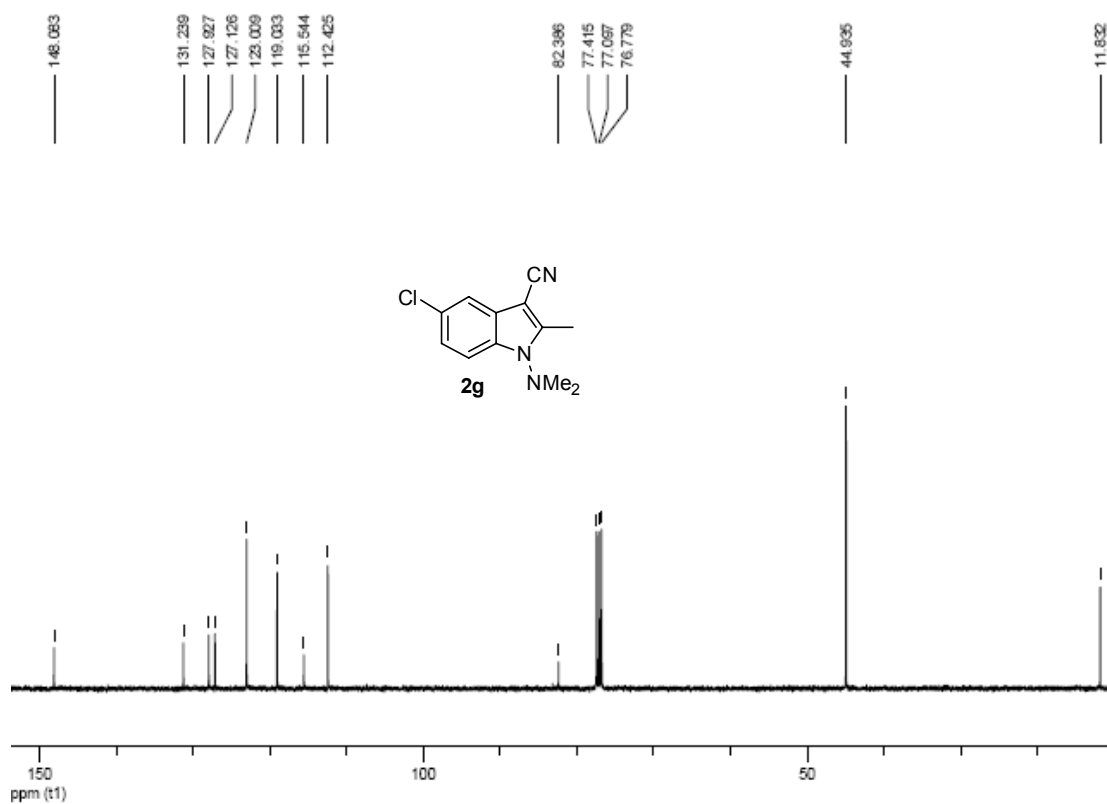

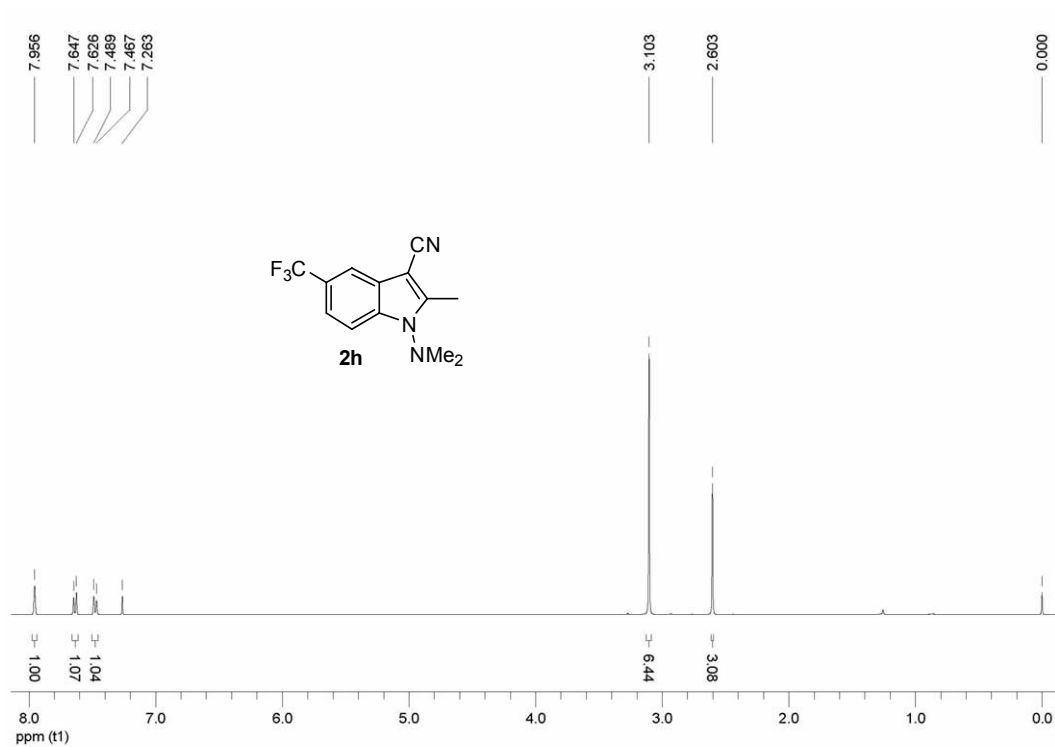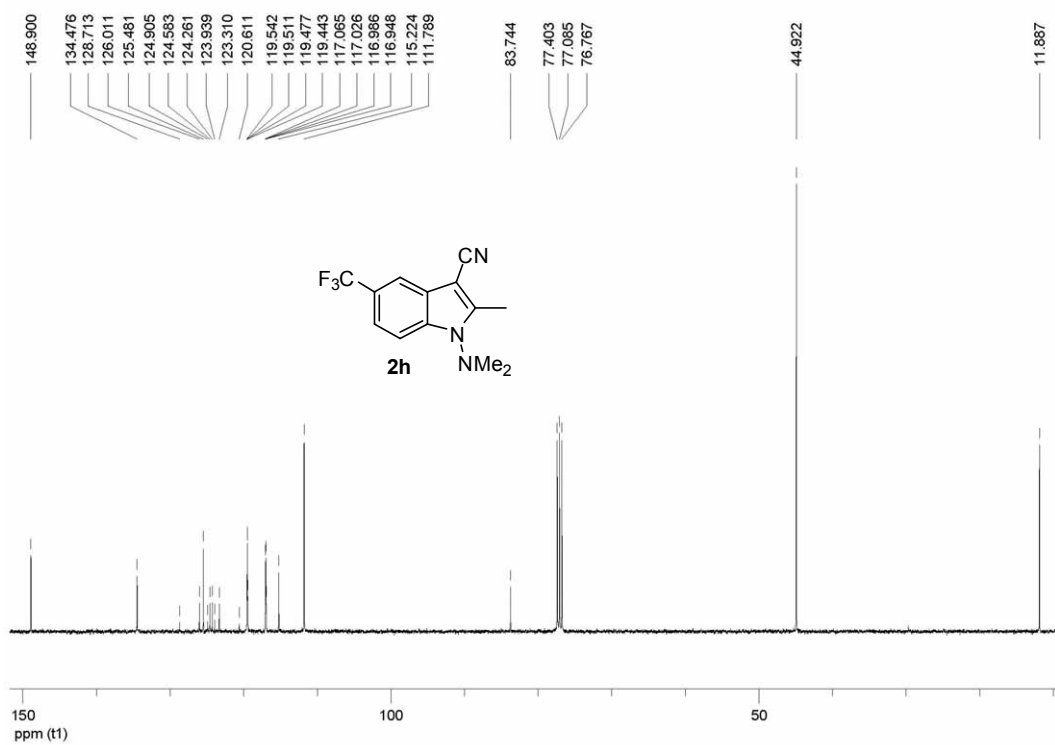

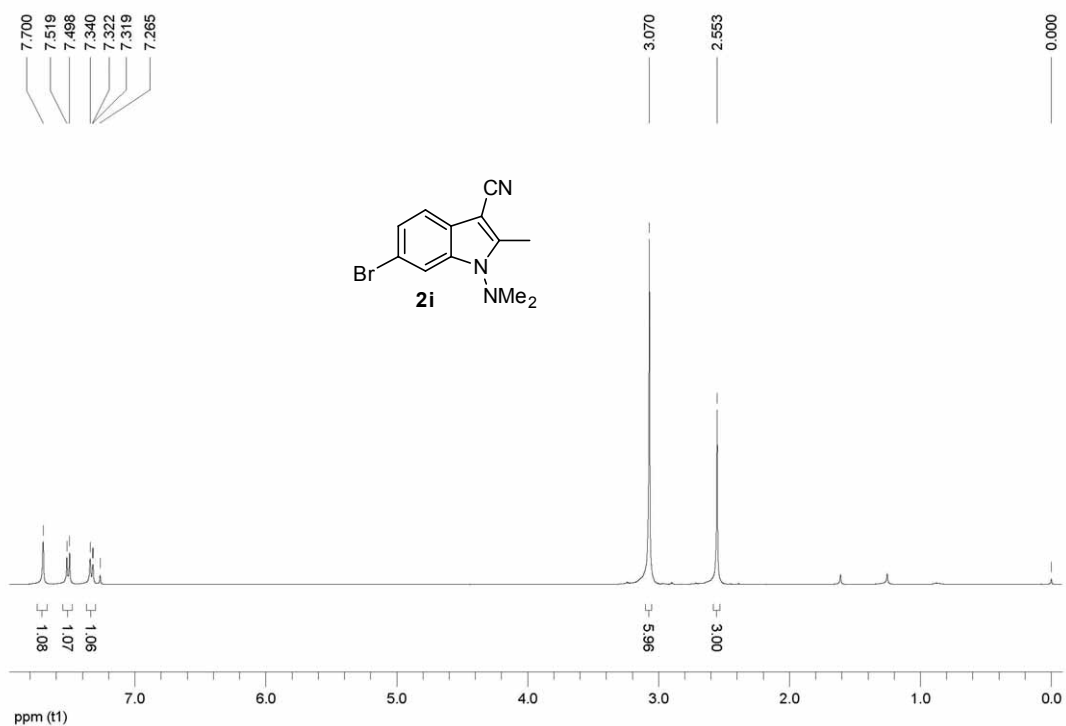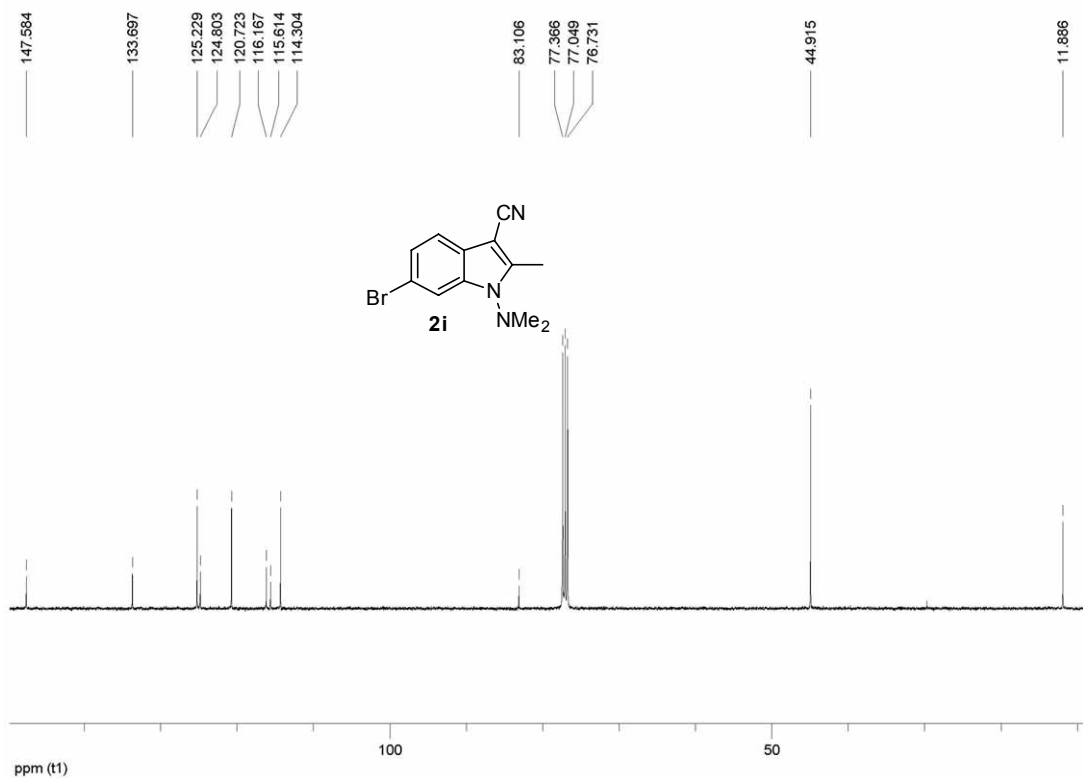

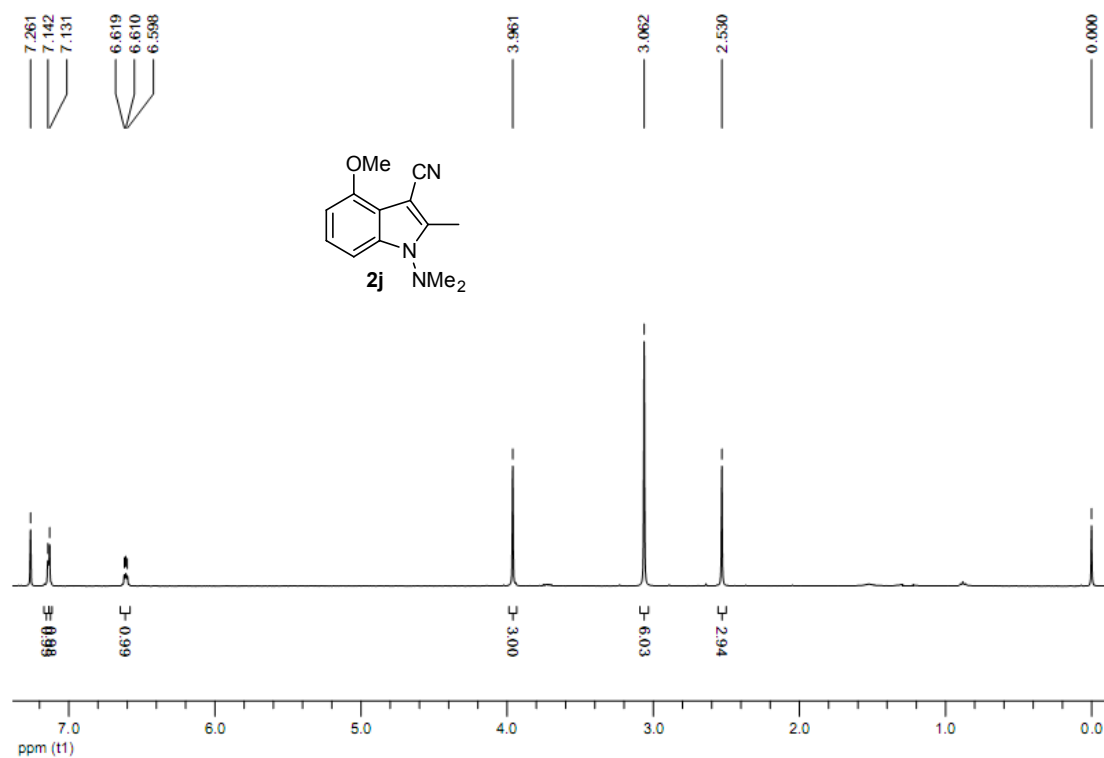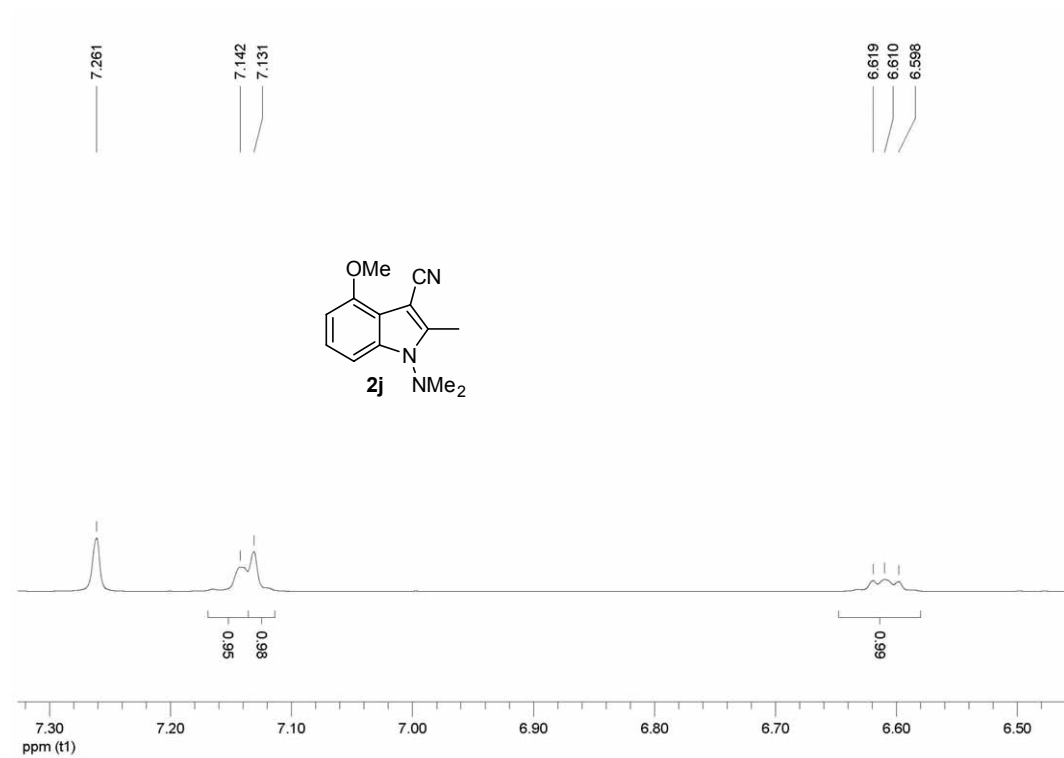

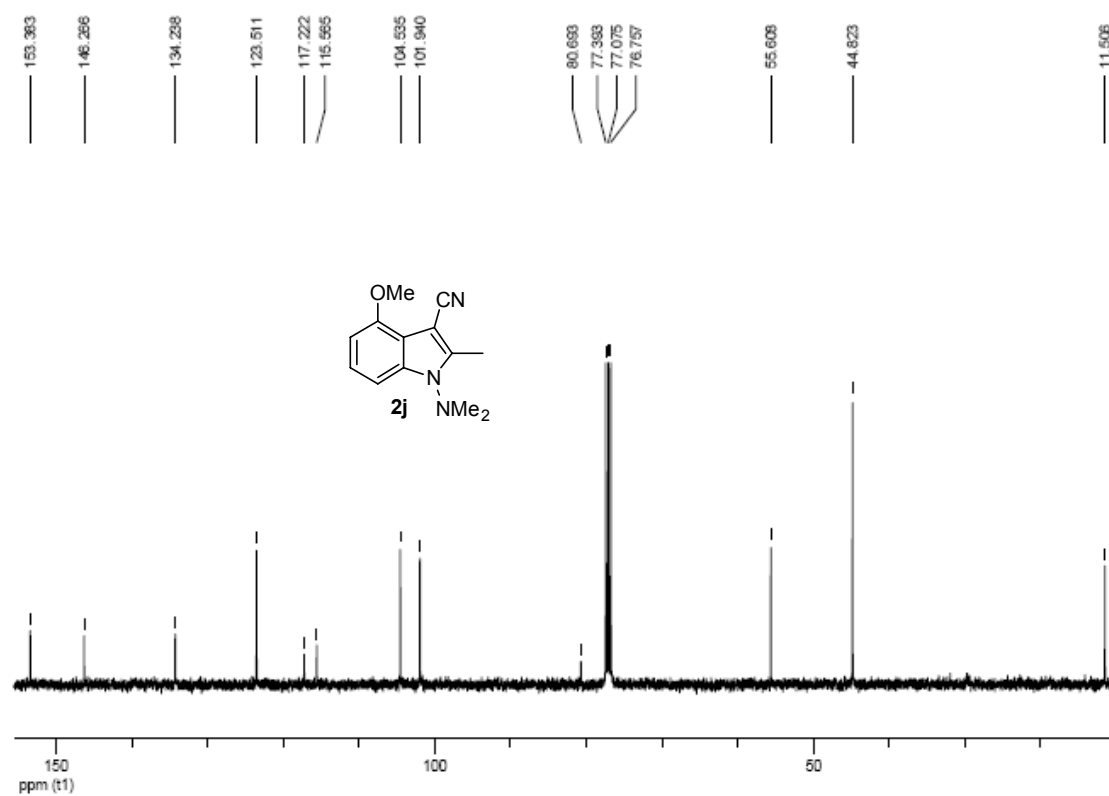

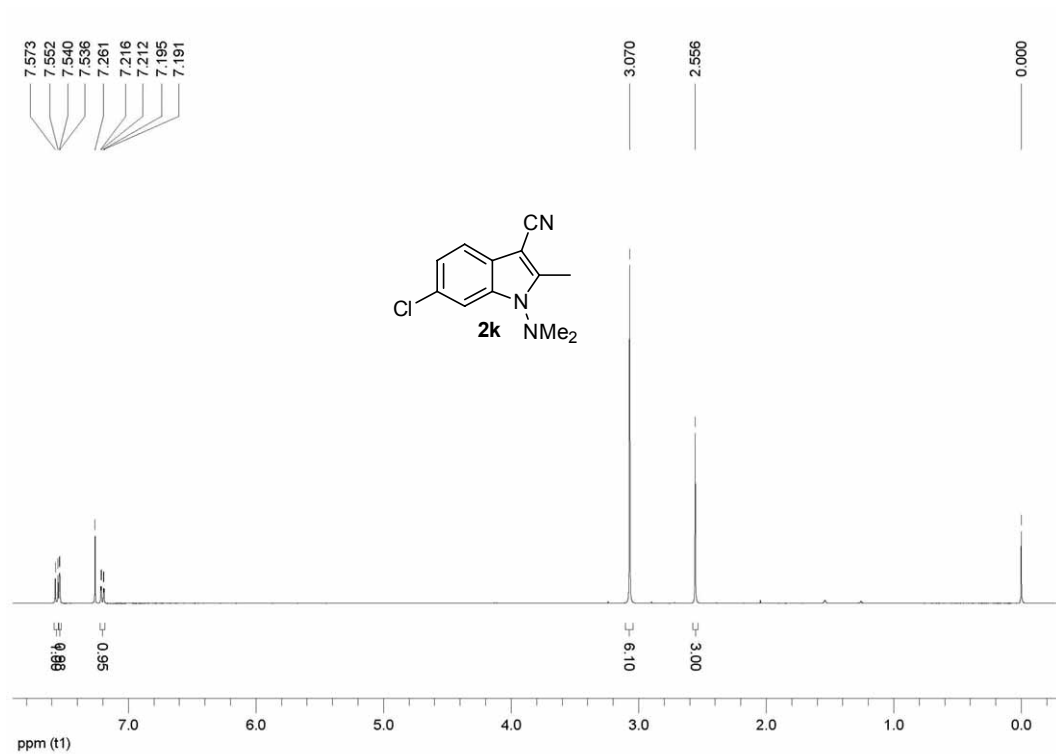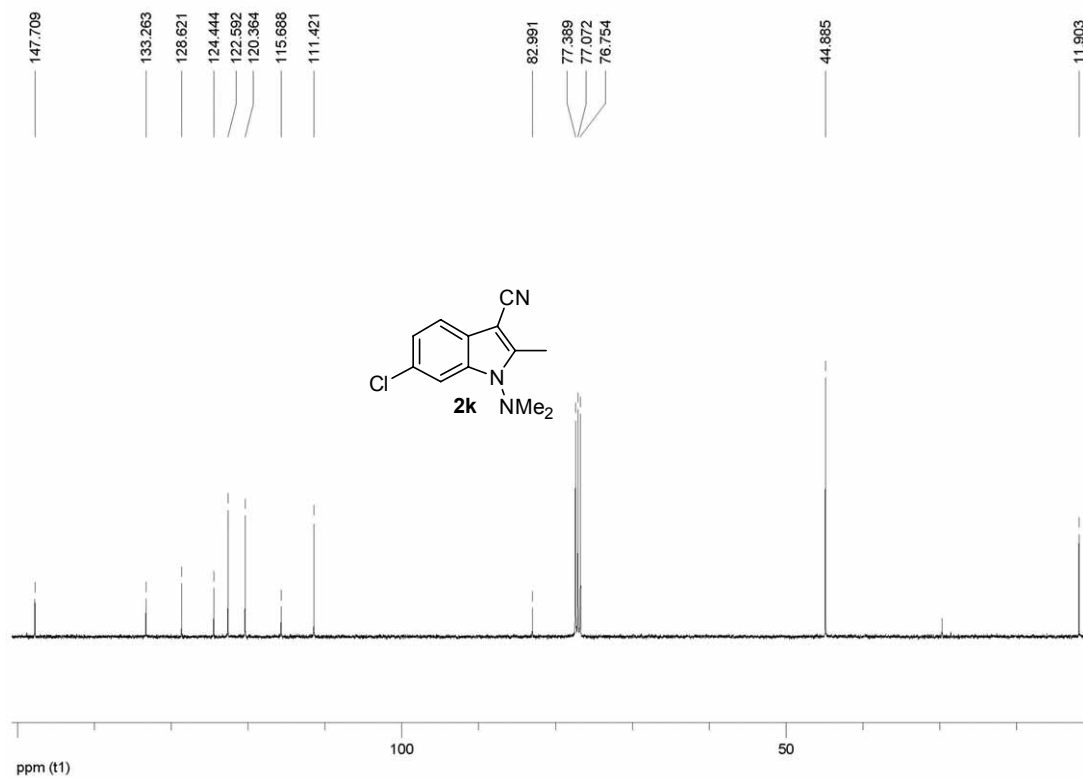



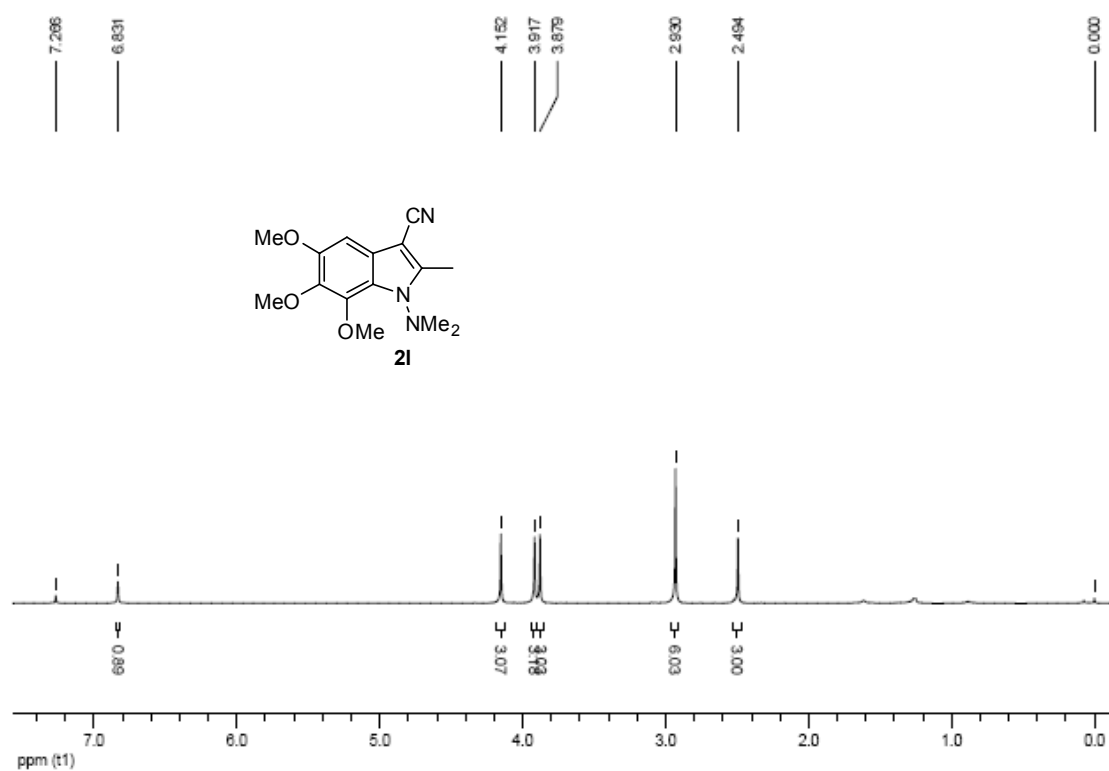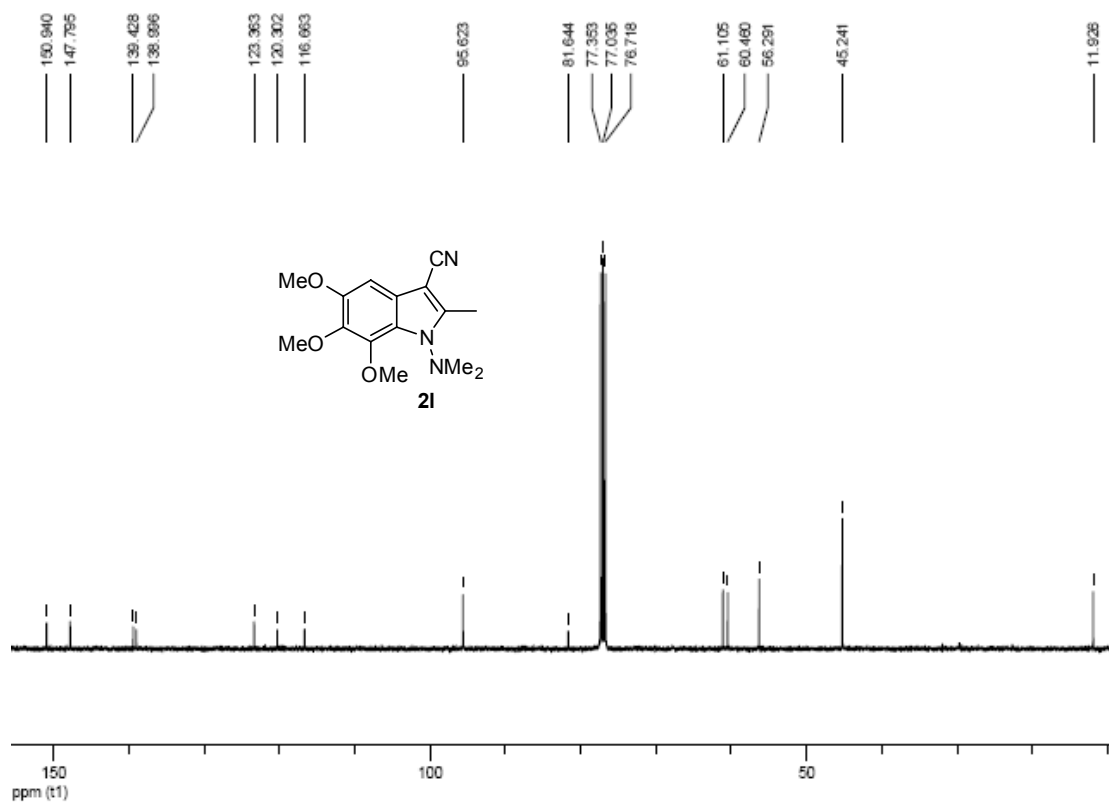

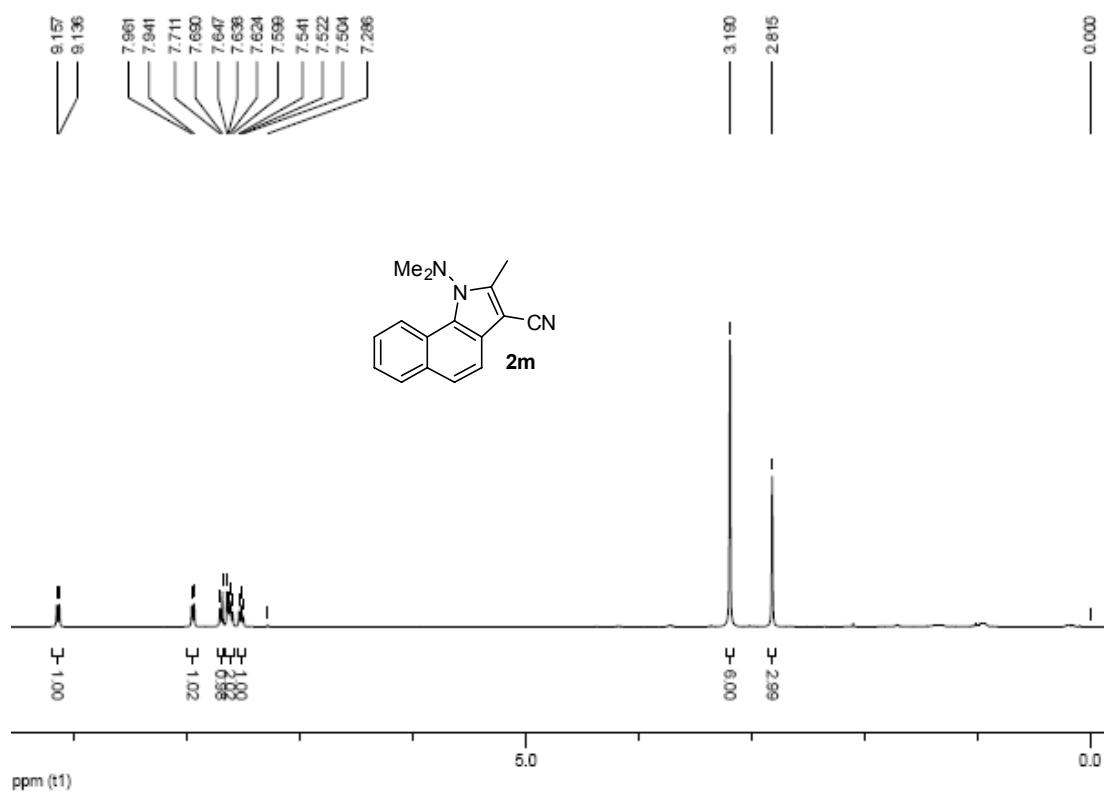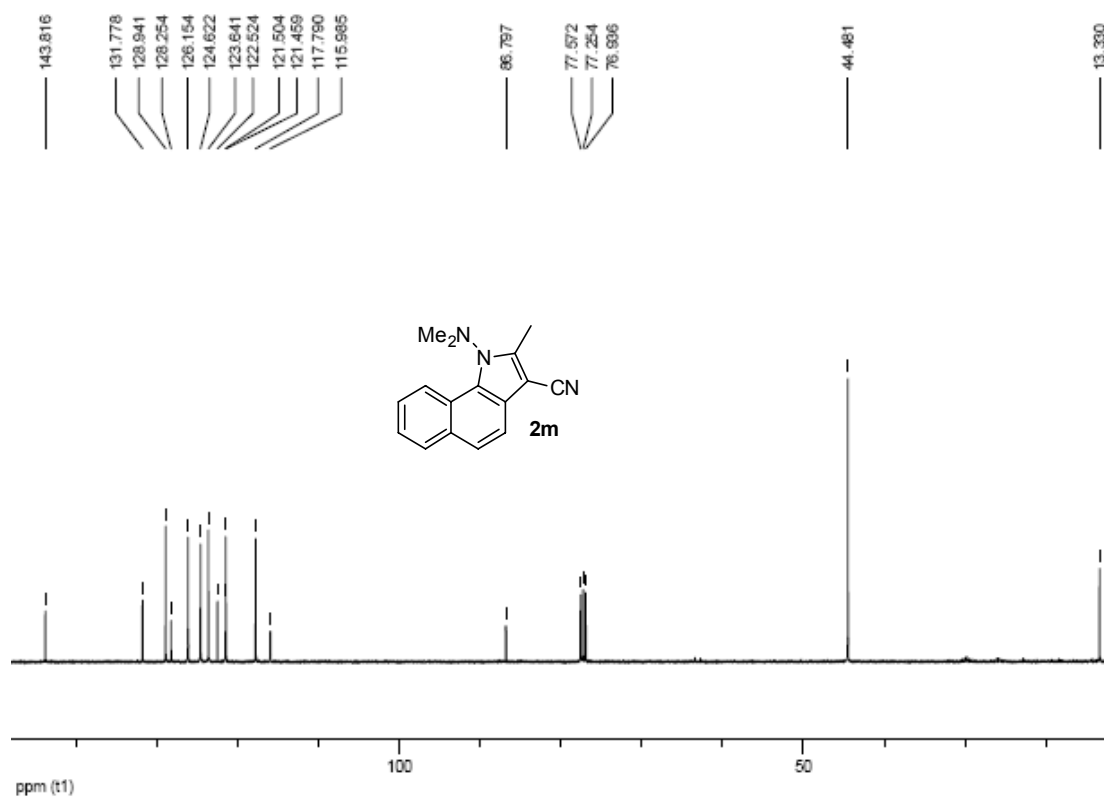

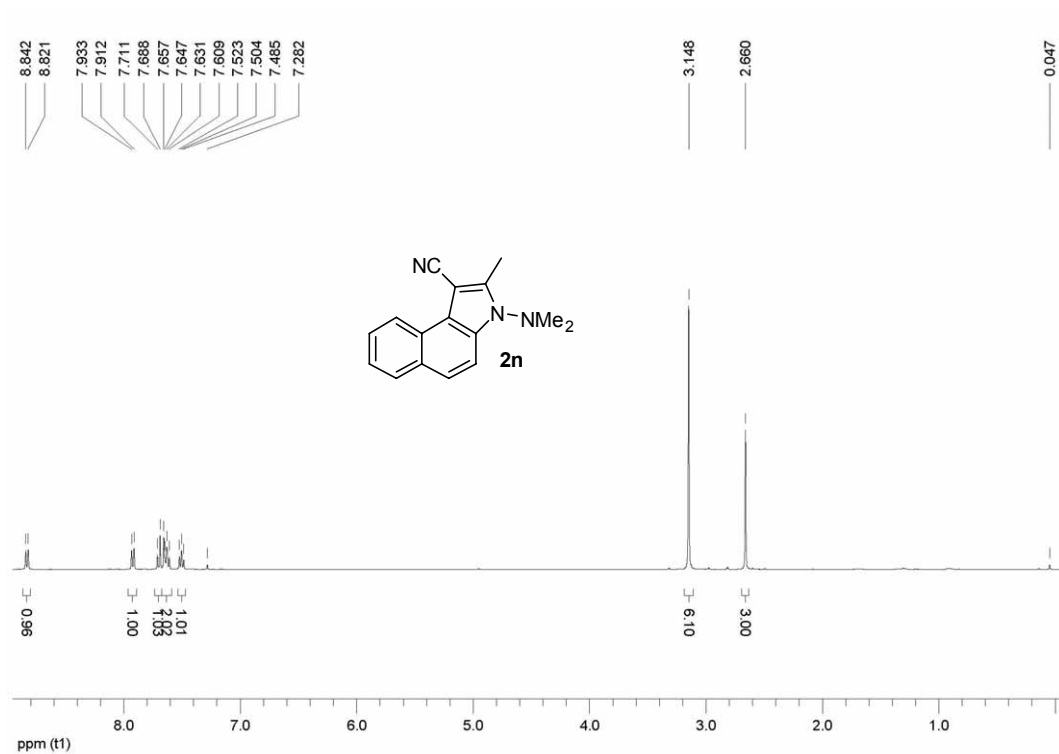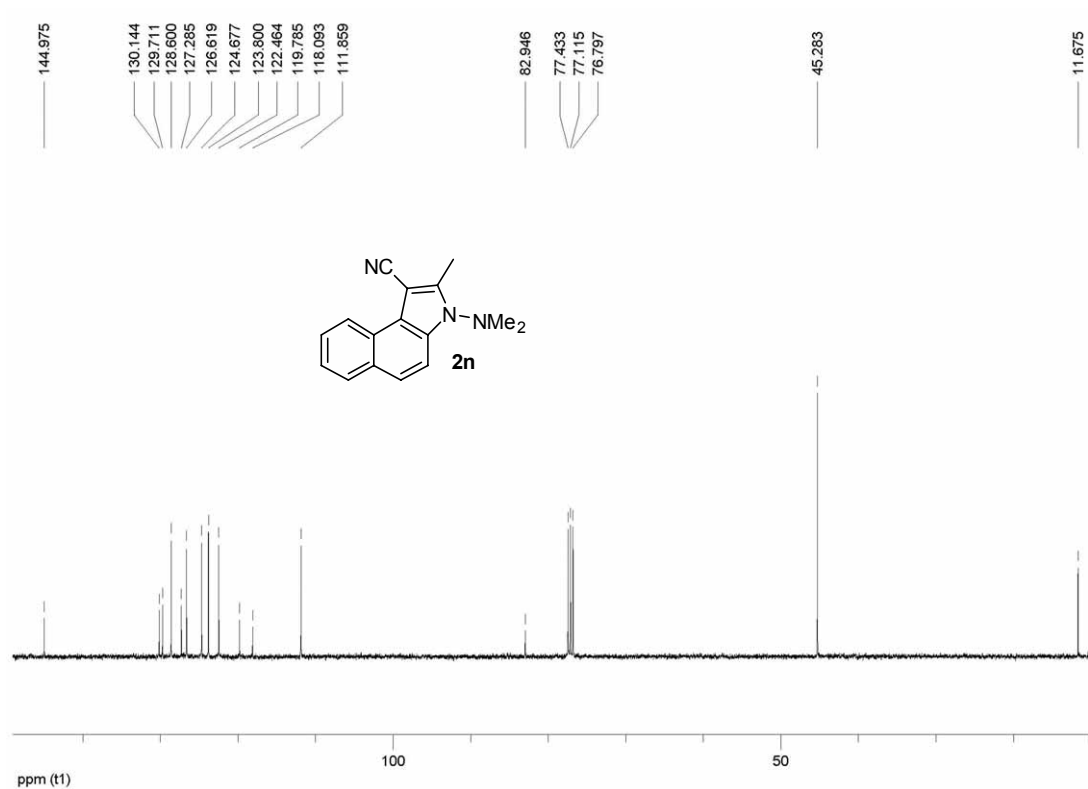

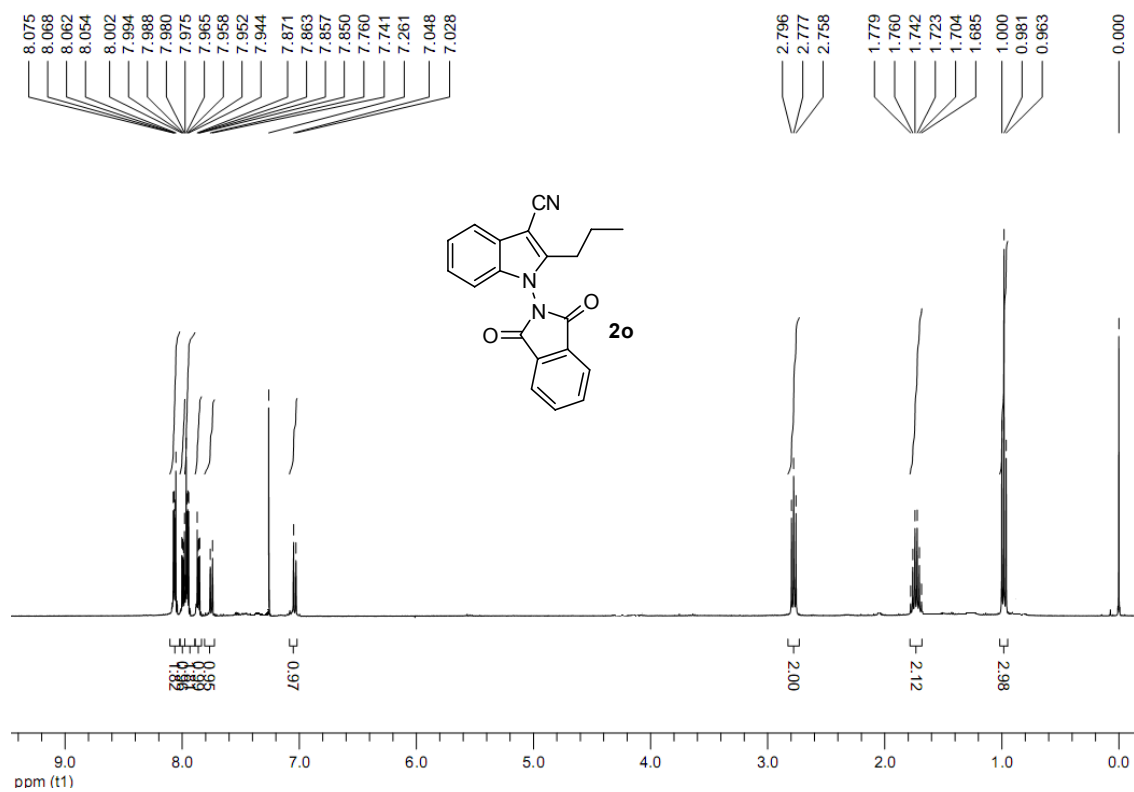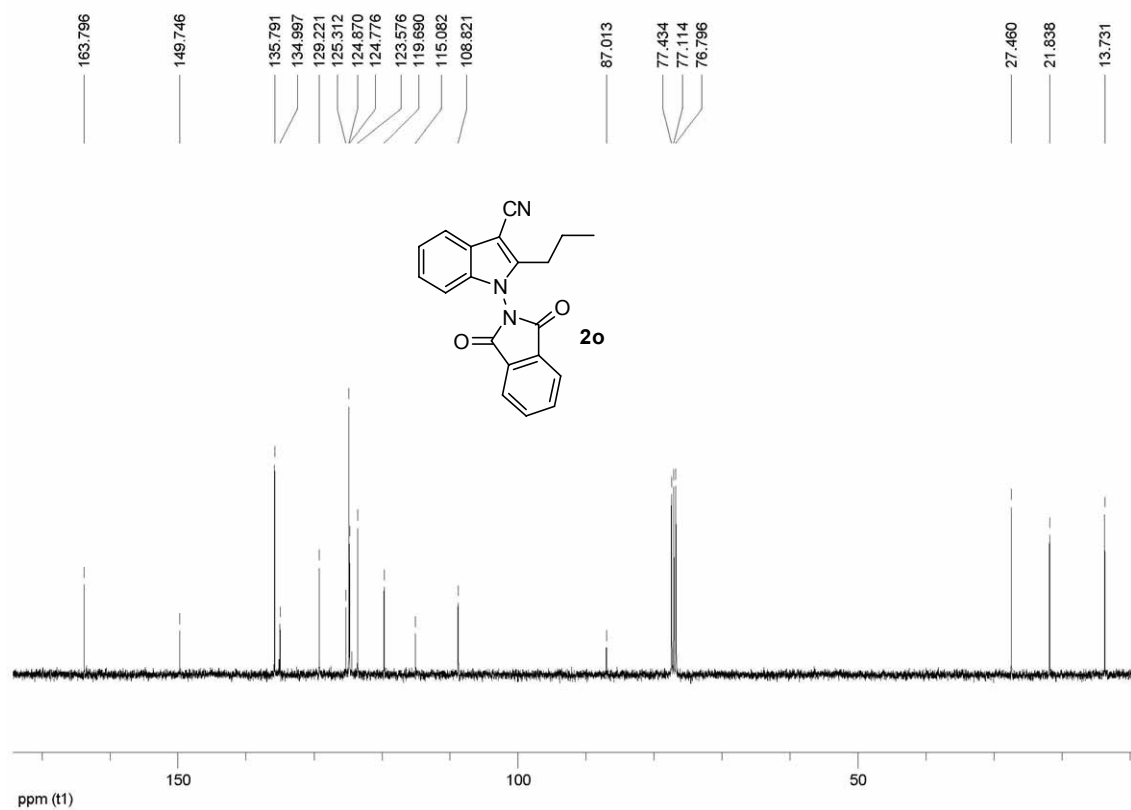

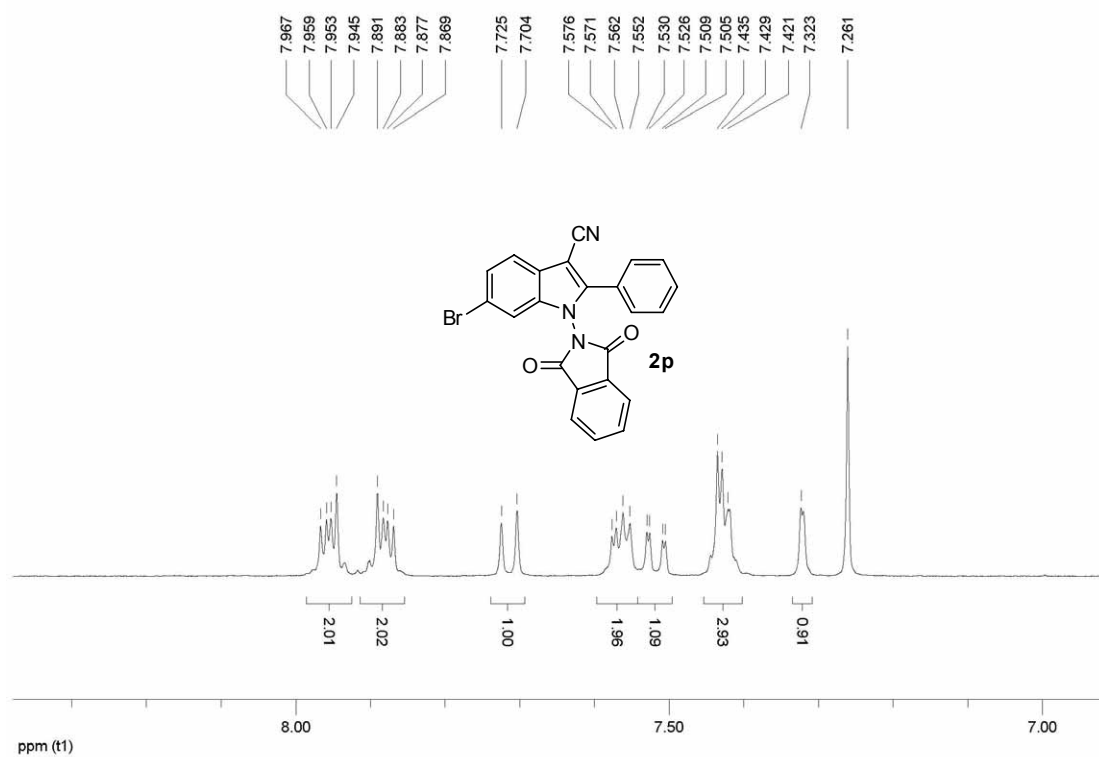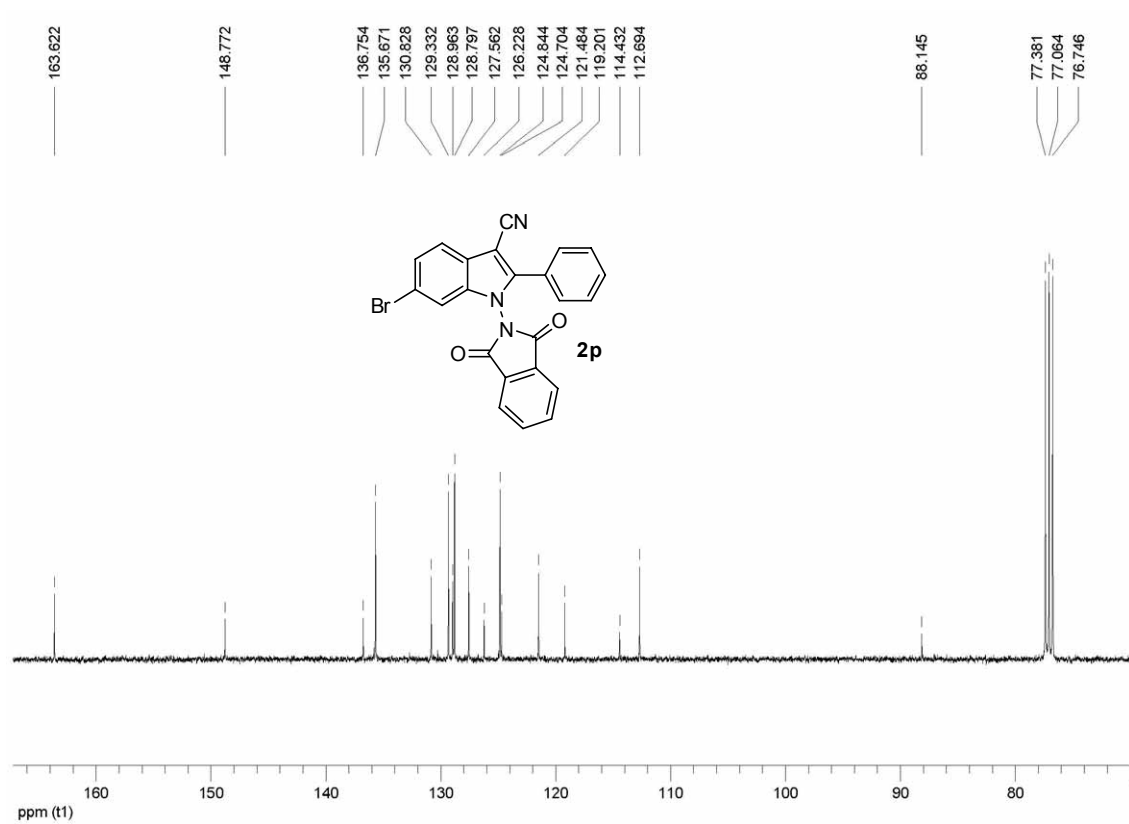

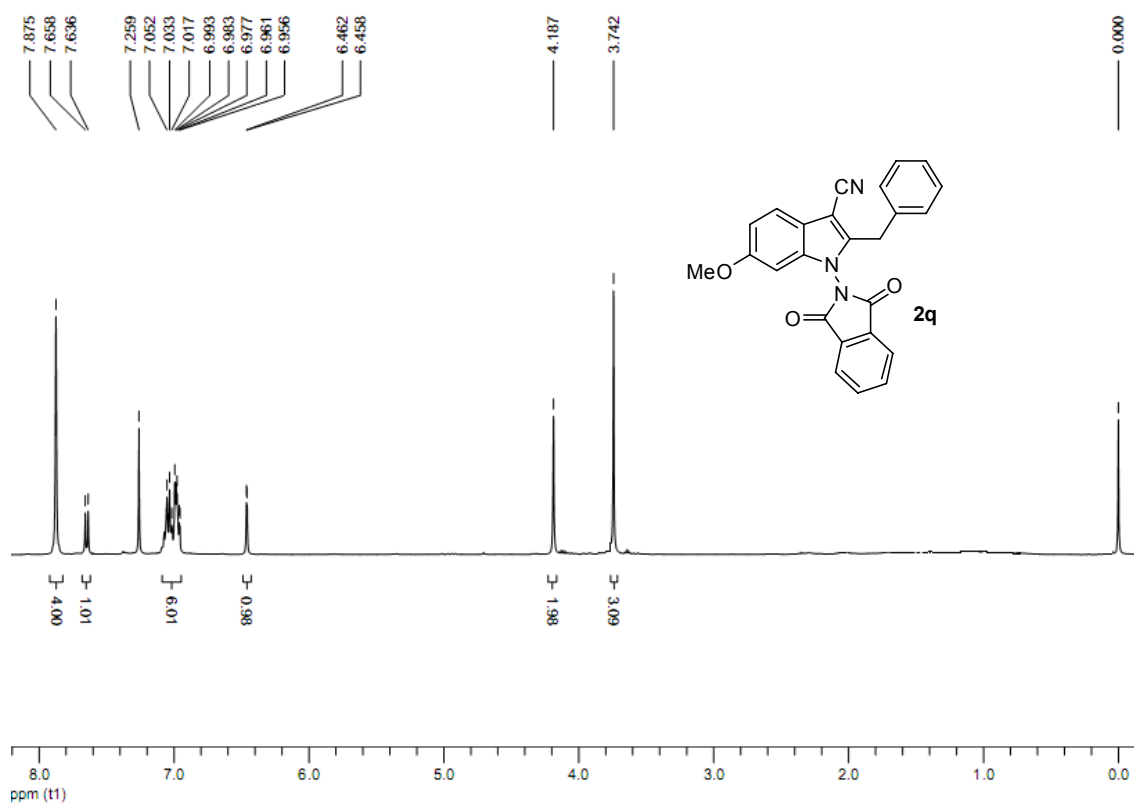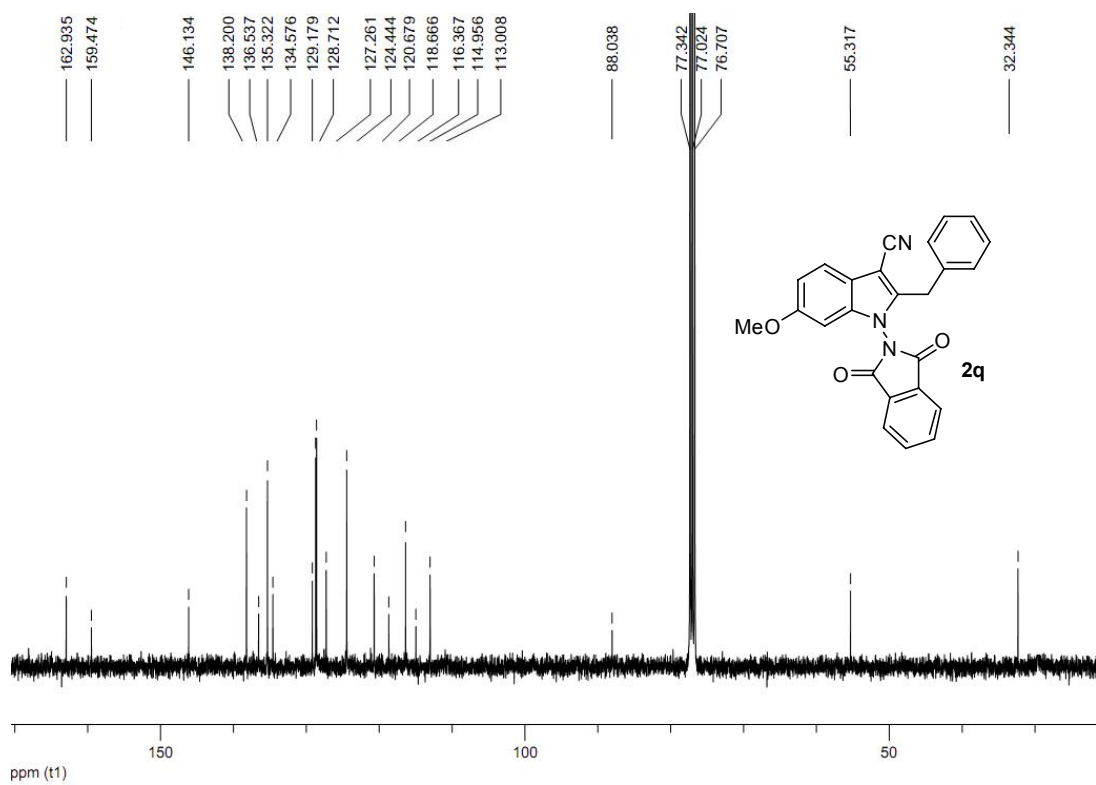

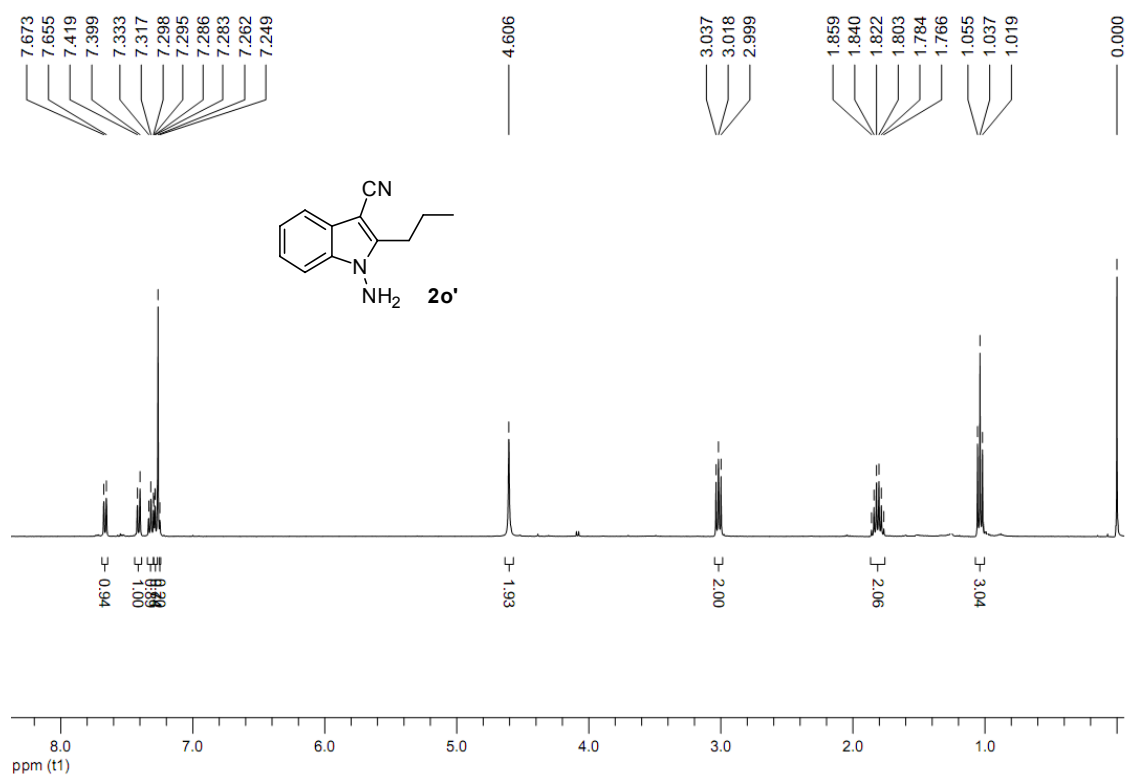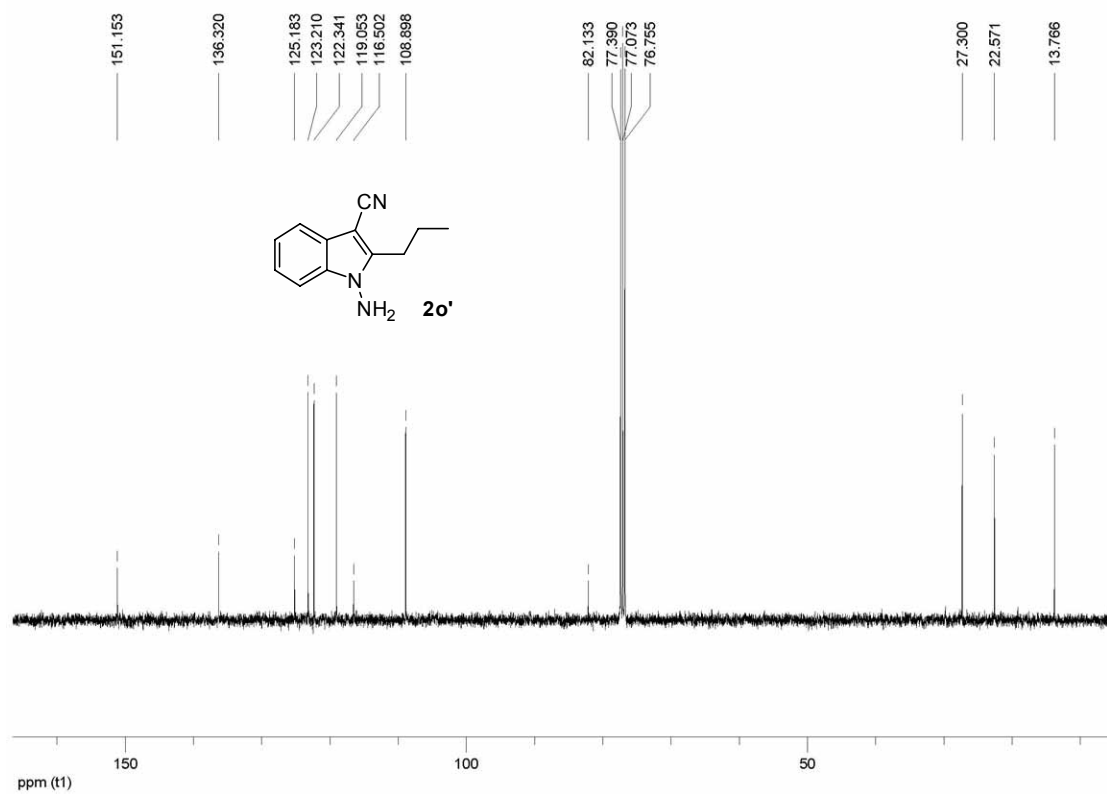

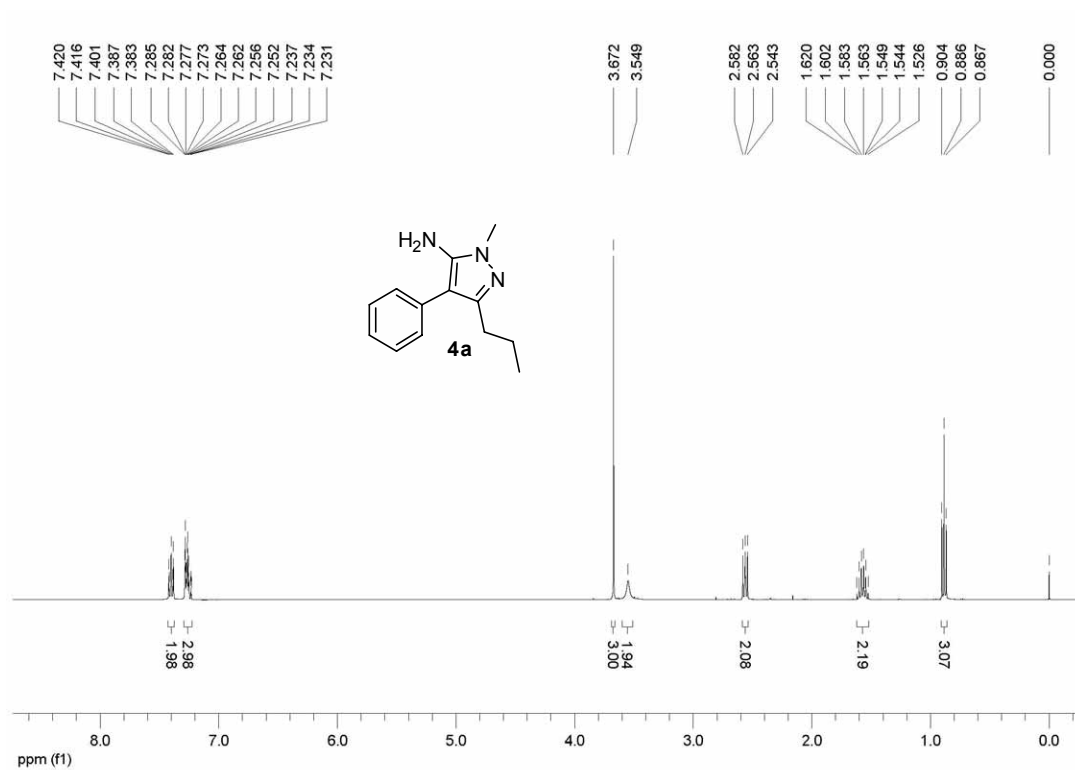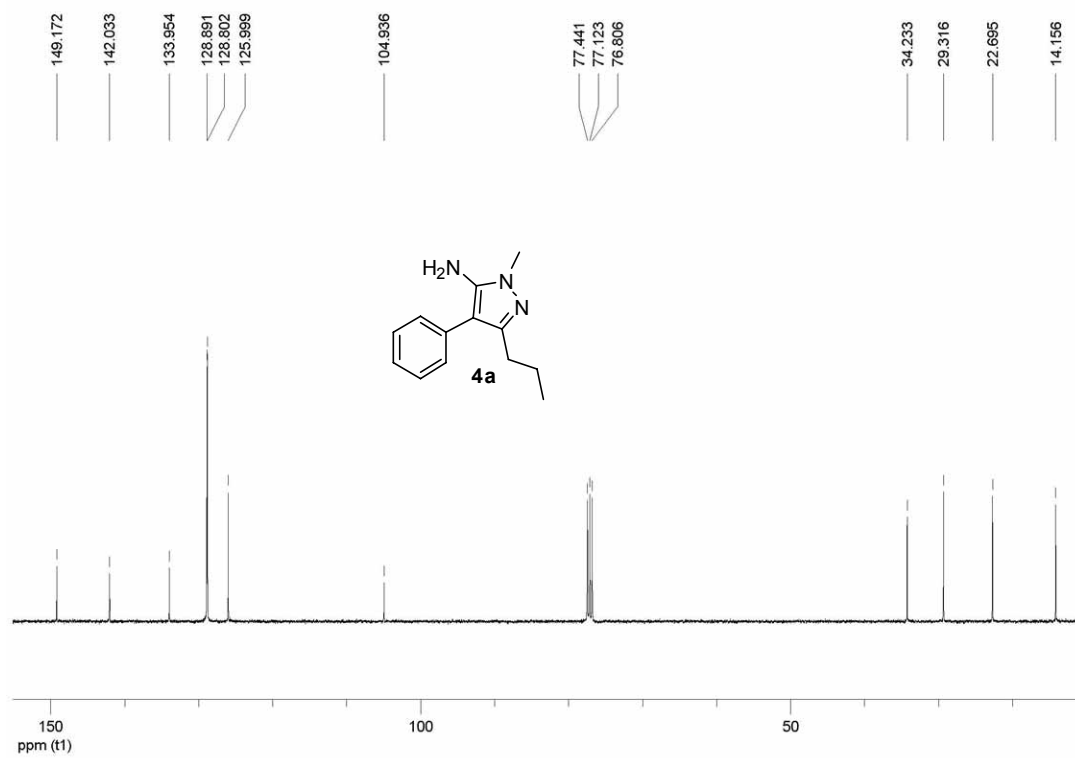



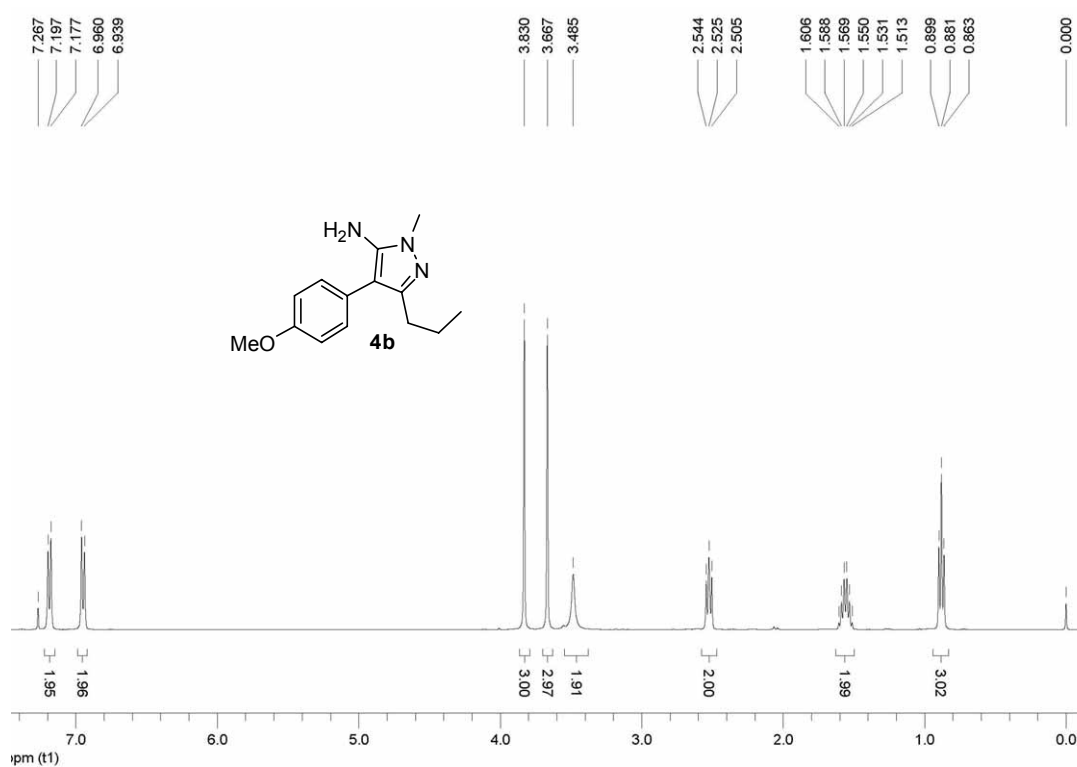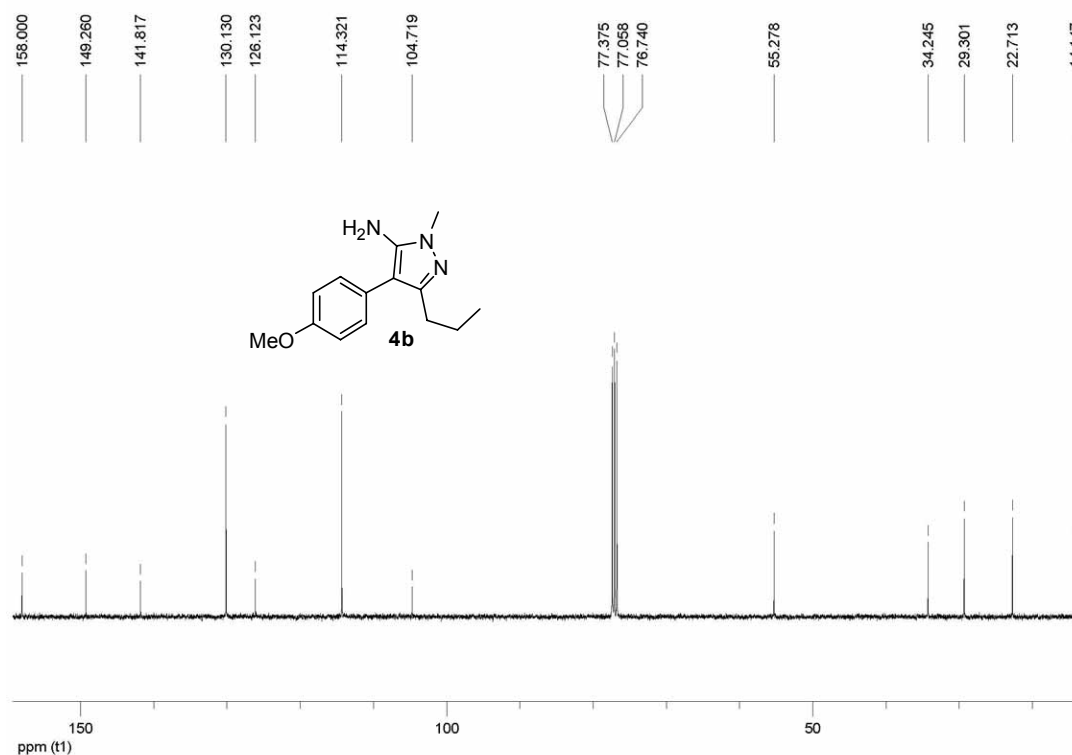

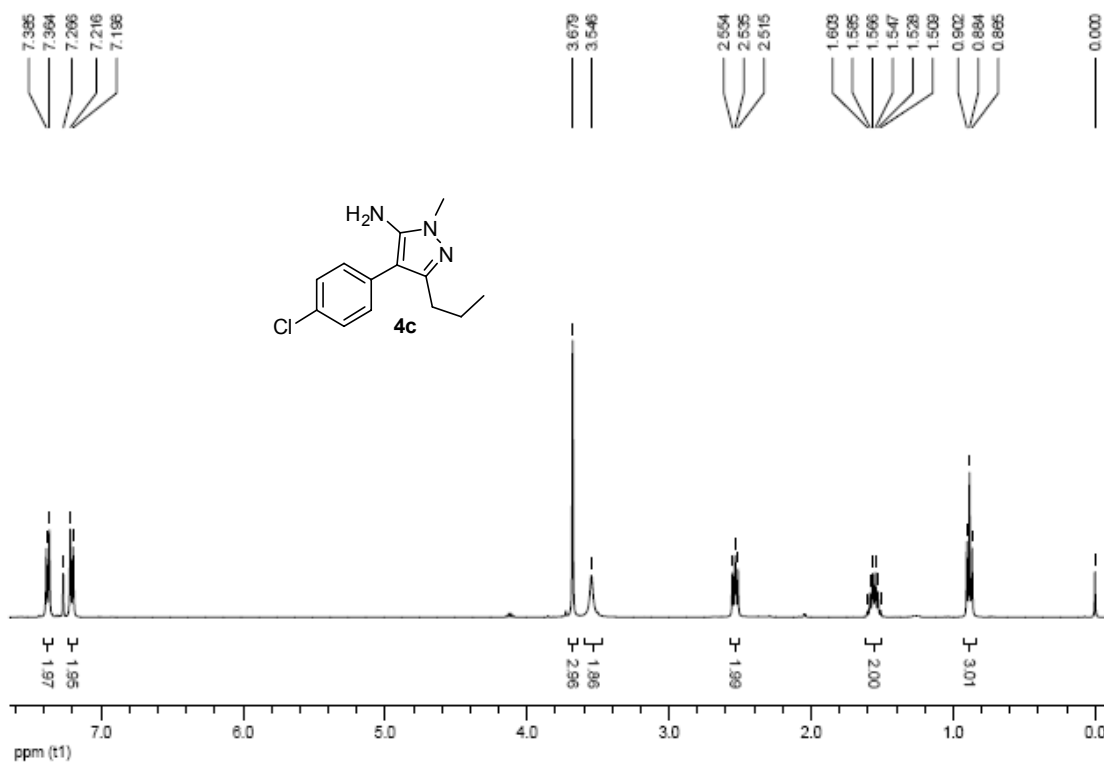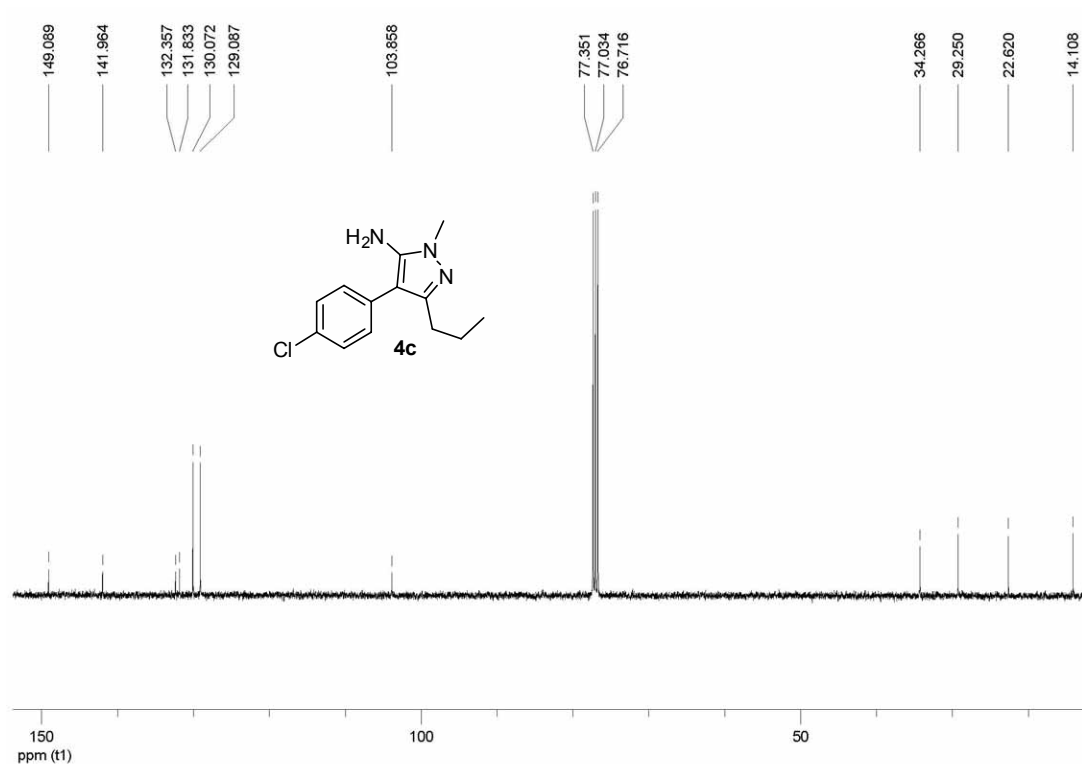

### X-ray structure and data of 2a

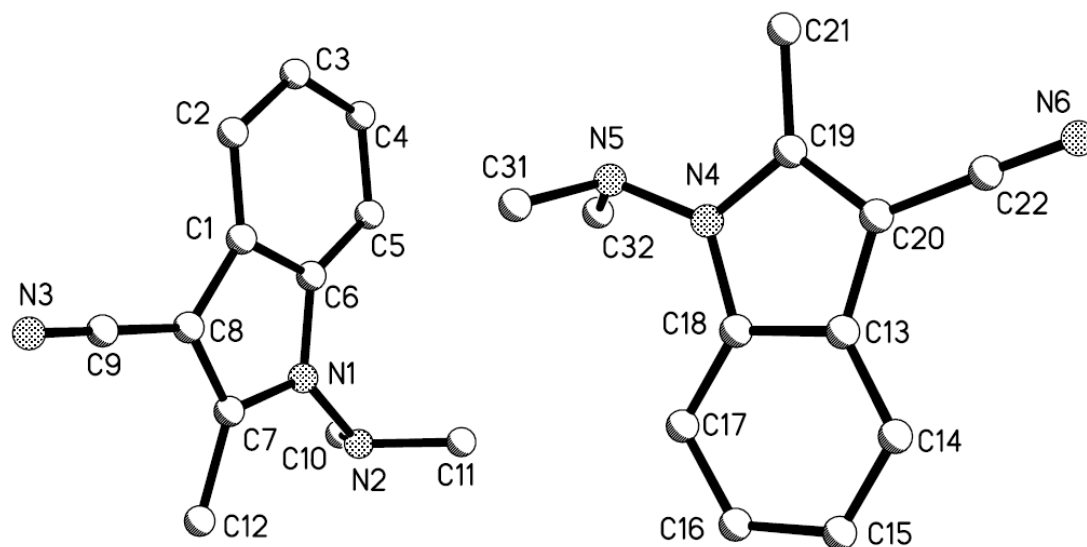

Table 1. Crystal data and structure refinement for **2a**.

The crystal of **2a** has been deposited in CCDC with number 772745.

|                             |                                                         |                                                                         |
|-----------------------------|---------------------------------------------------------|-------------------------------------------------------------------------|
| Identification code         | <b>2a</b>                                               |                                                                         |
| Empirical formula           | C <sub>12</sub> H <sub>13</sub> N <sub>3</sub>          |                                                                         |
| Formula weight              | 199.25                                                  |                                                                         |
| Temperature                 | 293(2) K                                                |                                                                         |
| Wavelength                  | 0.71073 Å                                               |                                                                         |
| Crystal system, space group | Triclinic, P-1                                          |                                                                         |
| Unit cell dimensions        | a = 8.8268(18) Å<br>b = 8.9764(18) Å<br>c = 16.501(3) Å | alpha = 99.27(3) deg.<br>beta = 96.72(3) deg.<br>gamma = 118.09(3) deg. |
| Volume                      | 1110.1(4) Å <sup>3</sup>                                |                                                                         |
| Z, Calculated density       | 4, 1.192 Mg/m <sup>3</sup>                              |                                                                         |
| Absorption coefficient      | 0.074 mm <sup>-1</sup>                                  |                                                                         |
| F(000)                      | 424.0                                                   |                                                                         |
| Crystal size                | 0.30 x 0.27 x 0.21 mm                                   |                                                                         |

|                                   |                                             |
|-----------------------------------|---------------------------------------------|
| Theta range for data collection   | 2.99 to 25.20 deg.                          |
| Limiting indices                  | -10<=h<=10, -10<=k<=10, -19<=l<=19          |
| Reflections collected / unique    | 10965/3982 [R(int) = 0.0291]                |
| Completeness to theta = 25.20     | 99.7 %                                      |
| Absorption correction             | Multi-scan                                  |
| Max. and min. transmission        | 0.9847 and 0.9782                           |
| Refinement method                 | Full-matrix least-squares on F <sup>2</sup> |
| Data / restraints / parameters    | 3982 / 0 / 277                              |
| Goodness-of-fit on F <sup>2</sup> | 1.069                                       |
| Final R indices [I>2sigma(I)]     | R1 = 0.0535, wR2 = 0.1461                   |
| R indices (all data)              | R1 = 0.1123, wR2 = 0.2100                   |
| Largest diff. peak and hole       | 0.22 and -0.20 e.A <sup>-3</sup>            |

Table 2. Atomic coordinates ( $\times 10^4$ ) and equivalent isotropic displacement parameters ( $\text{\AA}^2 \times 10^3$ ) for **2a**.

U(eq) is defined as one third of the trace of the orthogonalized  $U_{ij}$  tensor.

|       | x        | y        | z         | U(eq)    |
|-------|----------|----------|-----------|----------|
| C(1)  | 1519(3)  | -803(4)  | 939.2(18) | 660(7)   |
| C(2)  | 560(4)   | -2202(4) | 1288(2)   | 778(9)   |
| C(3)  | 37(4)    | -1861(4) | 2018(2)   | 808(9)   |
| C(4)  | 433(4)   | -189(4)  | 2408(2)   | 771(8)   |
| C(5)  | 1373(4)  | 1203(4)  | 2078(18)  | 711(8)   |
| C(6)  | 1914(3)  | 879(4)   | 1342(18)  | 635(7)   |
| C(7)  | 3015(3)  | 1074(4)  | 168(18)   | 664(7)   |
| C(8)  | 2236(4)  | -640(4)  | 200(18)   | 681(7)   |
| C(9)  | 2163(4)  | -1991(4) | -417(2)   | 796(9)   |
| C(10) | 2355(4)  | 4390(4)  | 984(2)    | 848(9)   |
| C(11) | 5031(4)  | 4657(4)  | 1800(2)   | 820(9)   |
| C(12) | 3881(4)  | 1916(4)  | -479(2)   | 857(9)   |
| C(13) | 11012(4) | 3684(4)  | 4366(17)  | 659(7)   |
| C(14) | 12663(4) | 4905(4)  | 4271(2)   | 796(9)   |
| C(15) | 12759(5) | 5705(4)  | 3623(2)   | 889(10)  |
| C(16) | 11229(5) | 5282(4)  | 3063(2)   | 884(10)  |
| C(17) | 9578(5)  | 4037(4)  | 3115      | (19)     |
| C(18) | 9496(4)  | 3248(4)  | 3777(17)  | 653(7)   |
| C(19) | 8629(4)  | 1649(4)  | 4744(17)  | 653(7)   |
| C(20) | 10431(4) | 2676(4)  | 4970(17)  | 656(7)   |
| C(21) | 7397(4)  | 406(4)   | 5168(19)  | 802(9)   |
| C(22) | 11500(4) | 2739(4)  | 5698(19)  | 714(8)   |
| C(31) | 6034(5)  | -50(5)   | 2778(2)   | 1002(11) |
| C(32) | 5509(4)  | 2178(5)  | 3562(2)   | 1022(12) |
| N(1)  | 2845(3)  | 1994(3)  | 8634(14)  | 664(6)   |
| N(2)  | 3642(3)  | 3815(3)  | 1036(15)  | 691(6)   |
| N(3)  | 2110(4)  | -3083(4) | -908(2)   | 1043(10) |
| N(4)  | 8065(3)  | 1981(3)  | 4019(14)  | 680(6)   |
| N(5)  | 6279(3)  | 1037(3)  | 3596(15)  | 763(7)   |
| N(6)  | 12393(4) | 2807(4)  | 6286(18)  | 955(9)   |

Table 3. Bond lengths [Å] and angles [deg] for **2a**.

|              |          |
|--------------|----------|
| C(1)-C(6)    | 1.404(4) |
| C(1)-C(2)    | 1.404(4) |
| C(1)-C(8)    | 1.436(4) |
| C(2)-C(3)    | 1.380(4) |
| C(2)-H(2)    | 0.9300   |
| C(3)-C(4)    | 1.389(4) |
| C(3)-H(3)    | 0.9300   |
| C(4)-C(5)    | 1.376(4) |
| C(4)-H(4)    | 0.9300   |
| C(5)-C(6)    | 1.393(4) |
| C(5)-H(5)    | 0.9300   |
| C(6)-N(1)    | 1.390(3) |
| C(7)-N(1)    | 1.369(3) |
| C(7)-C(8)    | 1.371(4) |
| C(7)-C(12)   | 1.484(4) |
| C(8)-C(9)    | 1.422(4) |
| C(9)-N(3)    | 1.145(4) |
| C(10)-N(2)   | 1.452(4) |
| C(10)-H(10A) | 0.9600   |
| C(10)-H(10B) | 0.9600   |
| C(10)-H(10C) | 0.9600   |
| C(11)-N(2)   | 1.457(4) |
| C(11)-H(11A) | 0.9600   |
| C(11)-H(11B) | 0.9600   |
| C(11)-H(11C) | 0.9600   |
| C(12)-H(12A) | 0.9600   |
| C(12)-H(12B) | 0.9600   |
| C(12)-H(12C) | 0.9600   |
| C(13)-C(14)  | 1.398(4) |
| C(13)-C(18)  | 1.404(4) |
| C(13)-C(20)  | 1.430(4) |
| C(14)-C(15)  | 1.369(4) |
| C(14)-H(14)  | 0.9300   |
| C(15)-C(16)  | 1.391(4) |
| C(15)-H(15)  | 0.9300   |
| C(16)-C(17)  | 1.380(4) |
| C(16)-H(16)  | 0.9300   |
| C(17)-C(18)  | 1.386(4) |
| C(17)-H(17)  | 0.9300   |
| C(18)-N(4)   | 1.400(3) |
| C(19)-C(20)  | 1.374(4) |
| C(19)-N(4)   | 1.372(3) |

---

|                     |          |
|---------------------|----------|
| C(19)-C(21)         | 1.484(4) |
| C(20)-C(22)         | 1.414(4) |
| C(21)-H(21A)        | 0.9600   |
| C(21)-H(21B)        | 0.9600   |
| C(21)-H(21C)        | 0.9600   |
| C(22)-N(6)          | 1.150(3) |
| C(31)-N(5)          | 1.459(4) |
| C(31)-H(31A)        | 0.9600   |
| C(31)-H(31B)        | 0.9600   |
| C(31)-H(31C)        | 0.9600   |
| C(32)-N(5)          | 1.476(4) |
| C(32)-H(32A)        | 0.9600   |
| C(32)-H(32B)        | 0.9600   |
| C(32)-H(32C)        | 0.9600   |
| N(1)-N(2)           | 1.403(3) |
| N(4)-N(5)           | 1.409(3) |
| C(6)-C(1)-C(2)      | 119.3(3) |
| C(6)-C(1)-C(8)      | 106.2(3) |
| C(2)-C(1)-C(8)      | 134.5(3) |
| C(3)-C(2)-C(1)      | 118.2(3) |
| C(3)-C(2)-H(2)      | 120.9    |
| C(1)-C(2)-H(2)      | 120.9    |
| C(2)-C(3)-C(4)      | 121.8(3) |
| C(2)-C(3)-H(3)      | 119.1    |
| C(4)-C(3)-H(3)      | 119.1    |
| C(5)-C(4)-C(3)      | 121.0(3) |
| C(5)-C(4)-H(4)      | 119.5    |
| C(3)-C(4)-H(4)      | 119.5    |
| C(4)-C(5)-C(6)      | 117.8(3) |
| C(4)-C(5)-H(5)      | 121.1    |
| C(6)-C(5)-H(5)      | 121.1    |
| C(5)-C(6)-N(1)      | 130.9(3) |
| C(5)-C(6)-C(1)      | 121.8(3) |
| N(1)-C(6)-C(1)      | 107.2(3) |
| N(1)-C(7)-C(8)      | 108.0(3) |
| N(1)-C(7)-C(12)     | 122.1(3) |
| C(8)-C(7)-C(12)     | 130.0(3) |
| C(7)-C(8)-C(9)      | 124.2(3) |
| C(7)-C(8)-C(1)      | 108.5(3) |
| C(9)-C(8)-C(1)      | 127.4(3) |
| N(3)-C(9)-C(8)      | 179.5(4) |
| N(2)-C(10)-H(10A)   | 109.5    |
| N(2)-C(10)-H(10B)   | 109.5    |
| H(10A)-C(10)-H(10B) | 109.5    |

---

---

|                     |          |
|---------------------|----------|
| N(2)-C(10)-H(10C)   | 109.5    |
| H(10A)-C(10)-H(10C) | 109.5    |
| H(10B)-C(10)-H(10C) | 109.5    |
| N(2)-C(11)-H(11A)   | 109.5    |
| N(2)-C(11)-H(11B)   | 109.5    |
| H(11A)-C(11)-H(11B) | 109.5    |
| N(2)-C(11)-H(11C)   | 109.5    |
| H(11A)-C(11)-H(11C) | 109.5    |
| H(11B)-C(11)-H(11C) | 109.5    |
| C(7)-C(12)-H(12A)   | 109.5    |
| C(7)-C(12)-H(12B)   | 109.5    |
| H(12A)-C(12)-H(12B) | 109.5    |
| C(7)-C(12)-H(12C)   | 109.5    |
| H(12A)-C(12)-H(12C) | 109.5    |
| H(12B)-C(12)-H(12C) | 109.5    |
| C(14)-C(13)-C(18)   | 119.4(3) |
| C(14)-C(13)-C(20)   | 134.0(3) |
| C(18)-C(13)-C(20)   | 106.6(3) |
| C(15)-C(14)-C(13)   | 119.2(3) |
| C(15)-C(14)-H(14)   | 120.4    |
| C(13)-C(14)-H(14)   | 120.4    |
| C(14)-C(15)-C(16)   | 120.1(3) |
| C(14)-C(15)-H(15)   | 120.0    |
| C(16)-C(15)-H(15)   | 120.0    |
| C(17)-C(16)-C(15)   | 122.7(3) |
| C(17)-C(16)-H(16)   | 118.7    |
| C(15)-C(16)-H(16)   | 118.7    |
| C(16)-C(17)-C(18)   | 116.7(3) |
| C(16)-C(17)-H(17)   | 121.6    |
| C(18)-C(17)-H(17)   | 121.6    |
| C(17)-C(18)-N(4)    | 131.4(3) |
| C(17)-C(18)-C(13)   | 121.9(3) |
| N(4)-C(18)-C(13)    | 106.7(3) |
| C(20)-C(19)-N(4)    | 107.5(3) |
| C(20)-C(19)-C(21)   | 129.9(3) |
| N(4)-C(19)-C(21)    | 122.6(3) |
| C(19)-C(20)-C(22)   | 124.6(3) |
| C(19)-C(20)-C(13)   | 108.8(3) |
| C(22)-C(20)-C(13)   | 126.6(3) |
| C(19)-C(21)-H(21A)  | 109.5    |
| C(19)-C(21)-H(21B)  | 109.5    |
| H(21A)-C(21)-H(21B) | 109.5    |
| C(19)-C(21)-H(21C)  | 109.5    |
| H(21A)-C(21)-H(21C) | 109.5    |

---



---

|                     |          |
|---------------------|----------|
| H(21B)-C(21)-H(21C) | 109.5    |
| N(6)-C(22)-C(20)    | 178.9(4) |
| N(5)-C(31)-H(31A)   | 109.5    |
| N(5)-C(31)-H(31B)   | 109.5    |
| H(31A)-C(31)-H(31B) | 109.5    |
| N(5)-C(31)-H(31C)   | 109.5    |
| H(31A)-C(31)-H(31C) | 109.5    |
| H(31B)-C(31)-H(31C) | 109.5    |
| N(5)-C(32)-H(32A)   | 109.5    |
| N(5)-C(32)-H(32B)   | 109.5    |
| H(32A)-C(32)-H(32B) | 109.5    |
| N(5)-C(32)-H(32C)   | 109.5    |
| H(32A)-C(32)-H(32C) | 109.5    |
| H(32B)-C(32)-H(32C) | 109.5    |
| C(7)-N(1)-C(6)      | 110.2(2) |
| C(7)-N(1)-N(2)      | 120.8(2) |
| C(6)-N(1)-N(2)      | 128.9(2) |
| N(1)-N(2)-C(10)     | 112.1(2) |
| N(1)-N(2)-C(11)     | 111.6(2) |
| C(10)-N(2)-C(11)    | 115.7(2) |
| C(19)-N(4)-C(18)    | 110.4(2) |
| C(19)-N(4)-N(5)     | 121.1(2) |
| C(18)-N(4)-N(5)     | 128.4(2) |
| N(4)-N(5)-C(31)     | 111.0(2) |
| N(4)-N(5)-C(32)     | 111.8(2) |
| C(31)-N(5)-C(32)    | 114.1(3) |

---

Symmetry transformations used to generate equivalent atoms:

Table 4. Anisotropic displacement parameters ( $\text{\AA}^2 \times 10^3$ ) for **2a**.  
 The anisotropic displacement factor exponent takes the form:  
 $-2 \pi^2 [ h^2 a^{*2} U11 + \dots + 2 h k a^* b^* U12 ]$

|       | U11    | U22    | U33    | U23    | U13    | U12    |
|-------|--------|--------|--------|--------|--------|--------|
| C(1)  | 59(15) | 70(18) | 65(18) | 18(15) | 9(14)  | 29(14) |
| C(2)  | 71(18) | 72(19) | 86(2)  | 27(17) | 13(17) | 32(16) |
| C(3)  | 68(18) | 89(2)  | 88(2)  | 45(19) | 22(17) | 34(17) |
| C(4)  | 71(18) | 93(2)  | 74(2)  | 34(18) | 24(16) | 40(18) |
| C(5)  | 69(17) | 75(19) | 67(19) | 19(16) | 17(15) | 34(16) |
| C(6)  | 58(15) | 68(18) | 62(17) | 21(14) | 15(13) | 27(14) |
| C(7)  | 58(15) | 74(19) | 59(18) | 15(15) | 11(13) | 27(15) |
| C(8)  | 61(16) | 69(18) | 63(18) | 10(15) | 8(14)  | 27(14) |
| C(9)  | 66(18) | 82(2)  | 78(2)  | 5(18)  | 8(16)  | 33(17) |
| C(10) | 76(19) | 93(2)  | 94(2)  | 36(19) | 19(17) | 45(18) |
| C(11) | 70(18) | 75(19) | 81(2)  | 15(17) | 3(16)  | 26(16) |
| C(12) | 84(2)  | 105(2) | 68(2)  | 28(18) | 25(17) | 43(19) |
| C(13) | 71(18) | 71(18) | 57(17) | 10(14) | 12(14) | 38(15) |
| C(14) | 75(2)  | 83(2)  | 76(2)  | 15(17) | 17(16) | 37(17) |
| C(15) | 92(2)  | 86(2)  | 87(2)  | 25(19) | 32(2)  | 40(19) |
| C(16) | 115(3) | 92(2)  | 79(2)  | 37(19) | 38(2)  | 60(2)  |
| C(17) | 94(2)  | 92(2)  | 66(2)  | 26(17) | 23(17) | 55(2)  |
| C(18) | 70(17) | 71(17) | 59(17) | 15(14) | 15(14) | 38(15) |
| C(19) | 73(18) | 77(18) | 53(16) | 16(14) | 12(14) | 44(16) |
| C(20) | 68(17) | 74(18) | 55(16) | 11(14) | 7(13)  | 38(15) |
| C(21) | 81(2)  | 92(2)  | 74(2)  | 30(18) | 24(17) | 44(18) |
| C(22) | 70(18) | 77(19) | 60(18) | 11(15) | 7(15)  | 34(16) |
| C(31) | 95(2)  | 96(2)  | 80(2)  | -4(2)  | -1(19) | 37(2)  |
| C(32) | 88(2)  | 134(3) | 105(3) | 30(2)  | 12(2)  | 73(2)  |
| N(1)  | 68(14) | 62(14) | 63(15) | 18(12) | 17(12) | 26(12) |
| N(2)  | 62(13) | 60(14) | 74(16) | 16(12) | 9(12)  | 24(11) |
| N(3)  | 95(2)  | 105(2) | 103(2) | -4(19) | 15(18) | 54(19) |
| N(4)  | 65(14) | 81(15) | 59(14) | 15(12) | 8(11)  | 39(13) |
| N(5)  | 66(14) | 92(18) | 67(16) | 14(14) | 4(12)  | 40(14) |
| N(6)  | 93(19) | 113(2) | 75(19) | 23(16) | 3(16)  | 50(18) |

Table 5. Hydrogen coordinates ( $\times 10^4$ ) and isotropic displacement parameters ( $\text{\AA}^2 \times 10^3$ ) for **2a**.

|        | x     | y     | z    | U(eq) |
|--------|-------|-------|------|-------|
| H(2)   | 284   | -3328 | 1033 | 930   |
| H(3)   | -598  | -2775 | 2257 | 970   |
| H(4)   | 57    | -7    | 2899 | 930   |
| H(5)   | 1639  | 2322  | 2338 | 850   |
| H(10A) | 1661  | 3963  | 419  | 1270  |
| H(10B) | 2953  | 5640  | 1135 | 1270  |
| H(10C) | 1601  | 3946  | 1363 | 1270  |
| H(11A) | 4517  | 4448  | 2281 | 1230  |
| H(11B) | 5683  | 5888  | 1848 | 1230  |
| H(11C) | 5809  | 4189  | 1776 | 1230  |
| H(12A) | 3080  | 2100  | -838 | 1290  |
| H(12B) | 4208  | 1177  | -809 | 1290  |
| H(12C) | 4915  | 3016  | -207 | 1290  |
| H(14)  | 13684 | 5170  | 4642 | 960   |
| H(15)  | 13848 | 6532  | 3558 | 1070  |
| H(16)  | 11322 | 5862  | 2636 | 1060  |
| H(17)  | 8571  | 3742  | 2724 | 950   |
| H(21A) | 8056  | 232   | 5612 | 1200  |
| H(21B) | 6625  | -688  | 4766 | 1200  |
| H(21C) | 6713  | 869   | 5399 | 1200  |
| H(31A) | 6607  | 680   | 2417 | 1500  |
| H(31B) | 4799  | -766  | 2527 | 1500  |
| H(31C) | 6535  | -778  | 2850 | 1500  |
| H(32A) | 6117  | 3018  | 3254 | 1530  |
| H(32B) | 5624  | 2771  | 4124 | 1530  |
| H(32C) | 4286  | 1487  | 3286 | 1530  |

Table 6. Torsion angles [deg] for **2a**.

|                      |         |
|----------------------|---------|
| C(6)-N(1)-N(2)-C(10) | -69.51  |
| C(6)-N(1)-N(2)-C(11) | 62.16   |
| C(7)-N(1)-N(2)-C(10) | 114.66  |
| C(7)-N(1)-N(2)-C(11) | -113.67 |
| C(6)-C(1)-C(2)-C(3)  | 0.14    |
| C(8)-C(1)-C(2)-C(3)  | -178.20 |
| C(2)-C(1)-C(6)-N(1)  | -179.44 |
| C(2)-C(1)-C(6)-C(5)  | -0.29   |
| C(8)-C(1)-C(6)-N(1)  | -0.67   |
| C(8)-C(1)-C(6)-C(5)  | 178.47  |
| C(2)-C(1)-C(8)-C(7)  | 178.21  |
| C(2)-C(1)-C(8)-C(9)  | -1.08   |
| C(6)-C(1)-C(8)-C(7)  | -0.28   |
| C(6)-C(1)-C(8)-C(9)  | -179.58 |
| C(1)-C(2)-C(3)-C(4)  | 0.08    |
| C(2)-C(3)-C(4)-C(5)  | -0.16   |
| C(3)-C(4)-C(5)-C(6)  | 0.00    |
| C(4)-C(5)-C(6)-N(1)  | 179.14  |
| C(4)-C(5)-C(6)-C(1)  | 0.22    |
| C(1)-C(6)-N(1)-N(2)  | -174.78 |
| C(1)-C(6)-N(1)-C(7)  | -1.41   |
| C(5)-C(6)-N(1)-N(2)  | 6.19    |
| C(5)-C(6)-N(1)-C(7)  | -177.63 |
| C(8)-C(7)-N(1)-N(2)  | 174.95  |
| C(8)-C(7)-N(1)-C(6)  | -1.59   |
| C(12)-C(7)-N(1)-N(2) | -6.32   |
| C(12)-C(7)-N(1)-C(6) | 177.13  |
| N(1)-C(7)-C(8)-C(1)  | 1.14    |
| N(1)-C(7)-C(8)-C(9)  | -179.54 |
| C(12)-C(7)-C(8)-C(1) | -177.46 |
| C(12)-C(7)-C(8)-C(9) | 1.87    |
| C(6)-C(1)-C(2)-H(2)  | -180    |
| C(8)-C(1)-C(2)-H(2)  | 2       |
| C(1)-C(2)-C(3)-H(3)  | -180    |
| H(2)-C(2)-C(3)-C(4)  | -180    |
| H(2)-C(2)-C(3)-H(3)  | 0       |
| C(2)-C(3)-C(4)-H(4)  | 180     |
| H(3)-C(3)-C(4)-C(5)  | 180     |
| H(3)-C(3)-C(4)-H(4)  | 0       |
| C(3)-C(4)-C(5)-H(5)  | -180    |
| H(4)-C(4)-C(5)-C(6)  | -180    |

---

|                         |         |
|-------------------------|---------|
| H(4)-C(4)-C(5)-H(5)     | 0       |
| H(5)-C(5)-C(6)-N(1)     | -1      |
| H(5)-C(5)-C(6)-C(1)     | -180    |
| N(1)-C(7)-C(12)-H(12A)  | -78     |
| N(1)-C(7)-C(12)-H(12B)  | 162     |
| N(1)-C(7)-C(12)-H(12C)  | 42      |
| C(8)-C(7)-C(12)-H(12A)  | 100     |
| C(8)-C(7)-C(12)-H(12B)  | -20     |
| C(8)-C(7)-C(12)-H(12C)  | -140    |
| H(10A)-C(10)-N(2)-N(1)  | -63     |
| H(10A)-C(10)-N(2)-C(11) | 167     |
| H(10B)-C(10)-N(2)-N(1)  | 177     |
| H(10B)-C(10)-N(2)-C(11) | 47      |
| H(10C)-C(10)-N(2)-N(1)  | 57      |
| H(10C)-C(10)-N(2)-C(11) | -73     |
| H(11A)-C(11)-N(2)-N(1)  | -70     |
| H(11A)-C(11)-N(2)-C(10) | 60      |
| H(11B)-C(11)-N(2)-N(1)  | 170     |
| H(11B)-C(11)-N(2)-C(10) | -60     |
| H(11C)-C(11)-N(2)-N(1)  | 50      |
| H(11C)-C(11)-N(2)-C(10) | 180     |
| C(18)-N(4)-N(5)-C(31)   | 62.80   |
| C(18)-N(4)-N(5)-C(32)   | -65.95  |
| C(19)-N(4)-N(5)-C(31)   | -113.14 |
| C(19)-N(4)-N(5)-C(32)   | 118.10  |
| C(18)-C(13)-C(14)-C(15) | 2.78    |
| C(20)-C(13)-C(14)-C(15) | -177.23 |
| C(14)-C(13)-C(18)-N(4)  | 178.54  |
| C(14)-C(13)-C(18)-C(17) | -2.20   |
| C(20)-C(13)-C(18)-N(4)  | -1.45   |
| C(20)-C(13)-C(18)-C(17) | 177.81  |
| C(14)-C(13)-C(20)-C(19) | -179.06 |
| C(14)-C(13)-C(20)-C(22) | 2.64    |
| C(18)-C(13)-C(20)-C(19) | 0.93    |
| C(18)-C(13)-C(20)-C(22) | -177.36 |
| C(13)-C(14)-C(15)-C(16) | -0.99   |
| C(14)-C(15)-C(16)-C(17) | -1.54   |
| C(15)-C(16)-C(17)-C(18) | 2.12    |
| C(16)-C(17)-C(18)-N(4)  | 178.82  |
| C(16)-C(17)-C(18)-C(13) | -0.23   |
| C(13)-C(18)-N(4)-N(5)   | -174.79 |
| C(13)-C(18)-N(4)-C(19)  | 1.50    |
| C(17)-C(18)-N(4)-N(5)   | 6.05    |
| C(17)-C(18)-N(4)-C(19)  | -177.66 |

---

---

|                          |         |
|--------------------------|---------|
| C(20)-C(19)-N(4)-N(5)    | 175.68  |
| C(20)-C(19)-N(4)-C(18)   | -0.92   |
| C(21)-C(19)-N(4)-N(5)    | -5.57   |
| C(21)-C(19)-N(4)-C(18)   | 177.83  |
| N(4)-C(19)-C(20)-C(13)   | -0.03   |
| N(4)-C(19)-C(20)-C(22)   | 178.32  |
| C(21)-C(19)-C(20)-C(13)  | -178.65 |
| C(21)-C(19)-C(20)-C(22)  | -0.31   |
| C(18)-C(13)-C(14)-H(14)  | -177    |
| C(20)-C(13)-C(14)-H(14)  | 3       |
| C(13)-C(14)-C(15)-H(15)  | 179     |
| H(14)-C(14)-C(15)-C(16)  | 179     |
| H(14)-C(14)-C(15)-H(15)  | -1      |
| C(14)-C(15)-C(16)-H(16)  | 178     |
| H(15)-C(15)-C(16)-C(17)  | 178     |
| H(15)-C(15)-C(16)-H(16)  | -2      |
| C(15)-C(16)-C(17)-H(17)  | -178    |
| H(16)-C(16)-C(17)-C(18)  | -178    |
| H(16)-C(16)-C(17)-H(17)  | 2       |
| H(17)-C(17)-C(18)-N(4)   | -1      |
| H(17)-C(17)-C(18)-C(13)  | 180     |
| N(4)-C(19)-C(21)-H(21A)  | 172     |
| N(4)-C(19)-C(21)-H(21B)  | 52      |
| N(4)-C(19)-C(21)-H(21C)  | -68     |
| C(20)-C(19)-C(21)-H(21A) | -10     |
| C(20)-C(19)-C(21)-H(21B) | -130    |
| C(20)-C(19)-C(21)-H(21C) | 110     |
| H(31A)-C(31)-N(5)-N(4)   | -66     |
| H(31A)-C(31)-N(5)-C(32)  | 62      |
| H(31B)-C(31)-N(5)-N(4)   | 174     |
| H(31B)-C(31)-N(5)-C(32)  | -58     |
| H(31C)-C(31)-N(5)-N(4)   | 54      |
| H(31C)-C(31)-N(5)-C(32)  | -178    |
| H(32A)-C(32)-N(5)-N(4)   | 62      |
| H(32A)-C(32)-N(5)-C(31)  | -65     |
| H(32B)-C(32)-N(5)-N(4)   | -58     |
| H(32B)-C(32)-N(5)-C(31)  | 175     |
| H(32C)-C(32)-N(5)-N(4)   | -178    |
| H(32C)-C(32)-N(5)-C(31)  | 55      |

---

Symmetry transformations used to generate equivalent atoms:

Table 7. Hydrogen bonds for **2a** [A and deg.].

---

| D-H...A | d(D-H) | d(H...A) | d(D...A) | <(DHA) |
|---------|--------|----------|----------|--------|
|---------|--------|----------|----------|--------|
